# Supplementary material for: Stereoselective heterocycle synthesis through a reversible allylic alcohol transposition and nucleophilic addition sequence
Source: Royal Society of Chemistry journal article supplement (doi:10.1039/c1sc00570g), 2011-01-01

## SUPPORTING INFORMATION

### Stereoselective Heterocycle Synthesis through a Reversible Allylic Alcohol Transposition and Nucleophilic Addition Sequence

Youwei Xie and Paul E. Floreancig\*

*Department of Chemistry  
University of Pittsburgh  
Pittsburgh, Pennsylvania 15260, USA*

#### General

<sup>1</sup>H NMR and <sup>13</sup>C NMR spectra were taken on a Bruker Avance 300 spectrometer at 300 MHz and 75 MHz respectively, a Bruker Avance 400 spectrometer at 400 MHz and 100 MHz, or a Bruker Avance 500 spectrometer at 500 MHz and 125 MHz, as specified. The chemical shifts are reported in parts per million (ppm) on the delta (δ) scale. The solvent peak was used as a reference value, for <sup>1</sup>H NMR: CDCl<sub>3</sub> = 7.27 ppm, CD<sub>2</sub>Cl<sub>2</sub> = 5.31 ppm, C<sub>6</sub>D<sub>6</sub> = 7.16 ppm, for <sup>13</sup>C NMR: CDCl<sub>3</sub> = 77.23, CDCl<sub>3</sub> = 53.52, C<sub>6</sub>D<sub>6</sub> = 128.37. Data are reported as follows: m = multiplet, s = singlet; d = doublet; t = triplet; q = quartet; p = pentet; dd = doublet of doublets; dt = doublet of triplets; br = broad. High resolution mass spectra were recorded on a Micromass UK Limited Q-ToF Ultima API or a Fissions VG Autospec spectrometer. Infrared (IR) spectra were taken on a Mattson Cygnus 100 spectrometer. Samples for IR were prepared as thin films on a NaCl plates by dissolving the corresponding compounds in CH<sub>2</sub>Cl<sub>2</sub> followed by evaporation of the CH<sub>2</sub>Cl<sub>2</sub>. Methylene chloride was distilled under N<sub>2</sub> from CaH<sub>2</sub>. Analytical TLC was performed on E. Merck pre-coated (25 mm) silica gel 60F-254 plates. Visualization was done under UV (254 nm). Flash chromatography was done using ICN SiliTech 32-63 60 Å silica gel. Reagent grade ethyl acetate, diethyl ether, pentane and hexanes (commercial mixture) were purchased from EM Science and used as is for chromatography. All reactions were performed in oven or flame-dried glassware under a positive pressure of N<sub>2</sub> with magnetic stirring unless otherwise noted.

#### General procedure for the Re<sub>2</sub>O<sub>7</sub>-mediated cyclization

To a solution of the substrate in CH<sub>2</sub>Cl<sub>2</sub> (~0.05-0.10M) was added Re<sub>2</sub>O<sub>7</sub> (0.05 equiv). The reaction mixture was stirred at rt (unless otherwise mentioned) until the starting was completely consumed as determined by TLC, then the reaction was quenched with a few drops of pyridine or triethylamine and the solvent was removed under vacuum. The final products were isolated after purification by flash chromatography or preparative TLC.

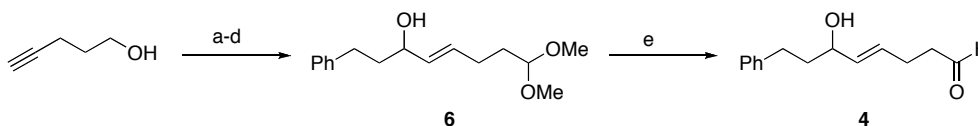

#### Reagents and conditions

a) DIBAL-H, THF, -78 °C, then I<sub>2</sub>, 52%. b) IBX, DMSO, 84%. c) (MeO)<sub>3</sub>CH, PPTs, MeOH, 88%. d) tBuLi, THF, -78 °C, then PhCH<sub>2</sub>CH<sub>2</sub>CHO, 50%. e) HOAc, H<sub>2</sub>O, 100%.

**Scheme 1.** Synthesis of substrates **4** and **6**.

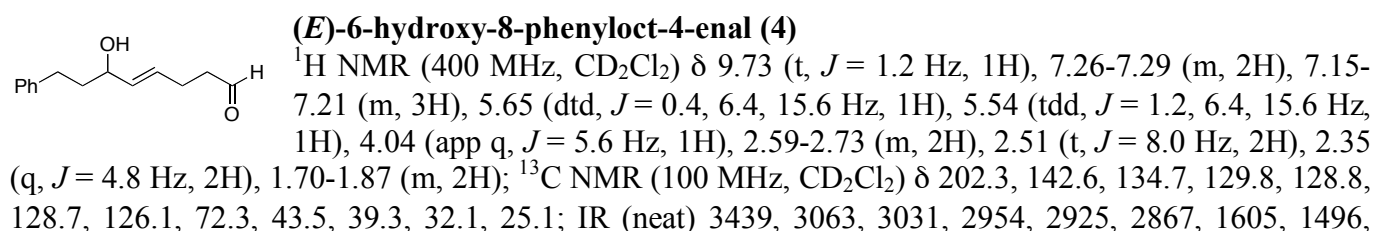

1453, 1375, 1179, 1121, 1024  $\text{cm}^{-1}$ ; HRMS (ESI) calcd for  $\text{C}_{14}\text{H}_{18}\text{O}_2\text{Na}$   $[\text{M}+\text{Na}]^+$  241.1204, found 241.1211.

**5-(4-phenylbut-1-en-1-yl)tetrahydrofuran-2-ol (5)**

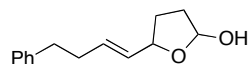

The general cyclization procedure was followed with **5** (50 mg, 0.23 mmol),  $\text{Re}_2\text{O}_7$  (5.5 mg, 0.011 mmol), and  $\text{CH}_2\text{Cl}_2$  (3 mL). The reaction was stirred at rt for 30 min and then was quenched with pyridine (25  $\mu\text{L}$ ). After evaporation of the solvent, the crude mixture was purified by flash chromatography (10-20% ethyl acetate in hexanes) to give the product (10 mg, 20%, dr = 1.2:1).  $^1\text{H}$  NMR (400 MHz,  $\text{CD}_2\text{Cl}_2$ )  $\delta$  7.24-7.28 (m, 2H), 7.14-7.19 (m, 3H), 5.70 (app q,  $J$  = 6.4 Hz, 0.45H), 5.67 (app q,  $J$  = 6.4 Hz, 0.55H), 5.54 (dt,  $J$  = 1.2, 7.6 Hz, 0.45H), 5.49-5.52 (m, 0.55H), 5.44 (dt,  $J$  = 1.2, 7.2 Hz, 0.45H), 5.39-5.41 (m, 0.55H), 4.54 (q,  $J$  = 6.8 Hz, 0.55H), 4.33 (q,  $J$  = 6.8, 0.45H), 2.65-2.72 (m, 2H), 2.57-2.63 (m, 1H), 2.30-2.43 (m, 2H), 1.82-2.16 (m, 2.4H), 1.70-1.82 (m, 1H), 1.46-1.55 (m, 0.6H);  $^{13}\text{C}$  NMR (100 MHz,  $\text{CD}_2\text{Cl}_2$ )  $\delta$  141.9, 133.0, 131.6, 131.4, 131.0, 128.4, 128.2, 125.7, 98.5, 98.4, 81.4, 78.8, 35.5, 34.2, 34.0, 33.8, 33.2, 30.4, 30.0; IR (neat) 3402, 3060, 3025, 2933, 2857, 1603, 1495, 1453, 1191, 1018; HRMS (ESI) calcd for  $\text{C}_{14}\text{H}_{18}\text{O}_2\text{Na}$   $[\text{M}+\text{Na}]^+$  241.1204, found 241.1228.

**(E)-8,8-dimethoxy-1-phenyloct-4-en-3-ol (6)**

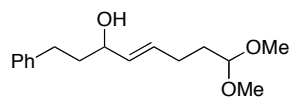

$^1\text{H}$  NMR (400 MHz,  $\text{CDCl}_3$ )  $\delta$  7.28-7.32 (m, 2H), 7.18-7.22 (m, 3H), 5.68 (ddt,  $J$  = 0.4, 6.4 Hz, 15.2, 1H), 5.55 (ddt,  $J$  = 1.2, 6.8, 15.2 Hz, 1H), 4.40 (t,  $J$  = 5.6 Hz, 1H), 4.09 (q,  $J$  = 5.7 Hz, 2H), 3.34 (s, 6H), 2.64-2.77 (m, 2H), 2.10-2.15 (q,  $J$  = 7.1 Hz, 2H), 1.77-1.94 (m, 2H), 1.74 (br, 1H), 1.70-1.70 (m, 2H);  $^{13}\text{C}$  NMR (100 MHz,  $\text{CDCl}_3$ )  $\delta$  142.0, 133.4, 131.2, 128.5, 128.4, 125.8, 103.9, 72.2, 52.76, 53.74, 38.8, 32.0, 31.8, 27.3; IR (neat) 3426, 3060, 3025, 2941, 2857, 2831, 1669, 1602, 1495, 1452, 1385, 1190, 1127, 1058 969, 913, 747  $\text{cm}^{-1}$ ; HRMS (APCI) calcd for  $\text{C}_{16}\text{H}_{24}\text{O}_3\text{Na}$   $[\text{M}+\text{Na}]^+$  287.1623, found 287.1632.

**2-methoxy-5-(4-phenylbut-1-en-1-yl)tetrahydrofuran (8)**

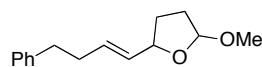

The general cyclization procedure was followed with **6** (50 mg, 0.19 mmol),  $\text{Re}_2\text{O}_7$  (4.6 mg, 0.010 mmol), DCM (3 mL), the reaction was stirred at rt for 30 min, then was quenched with pyridine (25  $\mu\text{L}$ ). After evaporation of the solvent, the crude mixture was purified by flash chromatography (1%-3% ethyl acetate in hexanes) to give the product (36 mg, 83%, dr = 6:4).  $^1\text{H}$  NMR (400 MHz,  $\text{CDCl}_3$ )  $\delta$  7.28-7.35 (m, 2H), 7.18-7.25 (m, 3H), 5.69-5.84 (m, 1H), 5.43-5.65 (m, 1H), 5.08 (dd,  $J$  = 2.0, 5.2 Hz, 0.6H), 4.99 (d,  $J$  = 4.4 Hz, 0.4H), 4.50 (q,  $J$  = 7.1 Hz, 0.6H), 4.45 (q,  $J$  = 7.7 Hz, 0.4H), 3.39 (s, 1.8H), 3.37 (s, 1.2H), 2.62-2.82 (m, 2H), 2.26-2.53 (m, 2H), 1.70-2.20 (m, 3.4H), 1.50-1.62 (m, 0.6H);  $^{13}\text{C}$  NMR (100 MHz,  $\text{CDCl}_3$ )  $\delta$  141.8, 132.8, 132.3, 131.8, 130.6, 128.5, 128.4, 128.32, 128.30, 125.9, 125.8, 105.3, 105.0, 81.5, 78.7, 54.9, 54.5, 35.53, 35.49, 34.1, 34.0, 33.5, 32.4, 30.3, 30.1; IR (neat) 3061, 3026, 2984, 2928, 2828, 1684, 1603, 1495, 1453, 1363, 1203, 1098, 1034, 966, 746  $\text{cm}^{-1}$ ; HRMS (ESI) calcd for  $\text{C}_{15}\text{H}_{20}\text{O}_2\text{Na}$   $[\text{M}+\text{Na}]^+$  255.1361, found 25.1374.

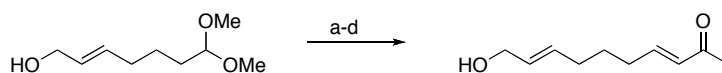

**Reagents and conditions**

a) HOAc,  $\text{H}_2\text{O}$ . b) TBDPSCI, imidazole, DMAP, DMF. c)  $(\text{EtO})_2\text{P}(\text{O})\text{CH}_2\text{C}(\text{O})\text{CH}_3$ , NaH, THF. d) HF-pyridine, THF.

**Scheme 2.** Synthesis of substrate **9**.

**(3E,8E)-10-hydroxydeca-3,8-dien-2-one (9)**

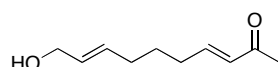

$^1\text{H}$  NMR (400 MHz,  $\text{CH}_2\text{Cl}_2$ )  $\delta$  6.77 (dt,  $J$  = 7.2, 16.0 Hz, 1H), 6.03 (dt,  $J$  = 1.4, 16.0 Hz, 1H), 5.59-5.70 (m, 2H), 4.04 (d,  $J$  = 3.6 Hz, 2H), 2.22 (dt,  $J$  = 1.4, 7.2 Hz, 2H), 2.19 (s, 3H), 2.03-2.11 (m, 2H), 1.56 (p,  $J$  = 7.6 Hz, 2H);  $^{13}\text{C}$  NMR (100 MHz,  $\text{CH}_2\text{Cl}_2$ )  $\delta$  198.3, 147.9, 131.7, 131.4, 130.1, 63.4, 31.8, 31.6, 27.6, 26.6; IR (neat) 3427, 3004, 2928, 2857, 1672, 1625, 1431, 1362, 1431, 1362, 1257, 1089, 972  $\text{cm}^{-1}$ ; HRMS (ESI) calcd for  $\text{C}_{10}\text{H}_{16}\text{O}_2\text{Na}$   $[\text{M}+\text{Na}]^+$  191.1048, found 191.1066.

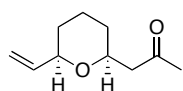

### 1-((2S,6R)-6-vinyltetrahydro-2H-pyran-2-yl)propan-2-one (10)

The general rearrangement procedure was followed with **9** (14.2 mg, 0.084 mmol),  $\text{Re}_2\text{O}_7$  (2.1 mg, 0.004 mmol), and  $\text{CD}_2\text{Cl}_2$  (1.5 mL). The reaction was stirred at 20 °C for 10 min, after which the catalyst was removed by filtration through a small pad of Celite.  $^1\text{H}$  NMR was taken directly to show a quantitative conversion.  $^1\text{H}$  NMR (400 MHz,  $\text{CD}_2\text{Cl}_2$ )  $\delta$  5.90 (ddd,  $J$  = 5.2, 10.4, 17.2 Hz, 1H), 5.16 (dt,  $J$  = 1.6, 17.2 Hz, 1H), 5.02 (dt,  $J$  = 1.6, 10.4 Hz, 1H), 3.75-3.85 (m, 2H), 2.63 (dd,  $J$  = 7.6, 15.6 Hz, 1H), 2.42 (dd,  $J$  = 5.2, 15.6 Hz, 1H), 2.13 (s, 3H), 1.79-1.87 (m, 1H), 1.51-1.65 (m, 3H), 1.13-1.29 (m, 2H);  $^{13}\text{C}$  NMR (100 MHz,  $\text{CD}_2\text{Cl}_2$ ) 207.1, 139.6, 113.7, 78.1, 74.1, 50.3, 31.19, 31.16, 30.6, 20.3; IR (neat) 2934, 2857, 1717, 1438, 1358, 1199, 1089, 1045, 989, 916  $\text{cm}^{-1}$ ; HRMS (EI) calcd for  $\text{C}_{10}\text{H}_{15}\text{O}_2$   $[\text{M}-\text{H}]^+$  167.1072, found 167.1100.

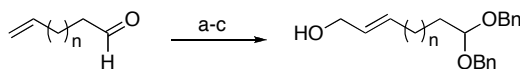

#### Reagents and conditions

a)  $\text{BnOH}$ ,  $p\text{-TsOH}$ ,  $\text{Na}_2\text{SO}_4$ ,  $\text{CH}_2\text{Cl}_2$ , 64% ( $n$  = 1), 51% ( $n$  = 2), 52% ( $n$  = 3). b) Methyl acrylate, Grubbs-Hoveyda metathesis catalyst,  $\text{CH}_2\text{Cl}_2$ , reflux, 89% ( $n$  = 1), 97% ( $n$  = 2), 99% ( $n$  = 3). c) DIBAL-H,  $\text{CH}_2\text{Cl}_2$ , -78 °C, 90% ( $n$  = 1), 89% ( $n$  = 2), 86% ( $n$  = 3).

**Scheme 3.** Synthesis of substrates **11**, **13**, and **15**.

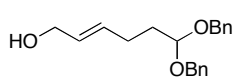

### (*E*)-6,6-bis(benzyloxy)hex-2-en-1-ol (11)

$^1\text{H}$  NMR (400 MHz,  $\text{CDCl}_3$ )  $\delta$  7.34-7.45 (m, 10H), 5.62-5.76 (m, 2H), 4.83 (t,  $J$  = 6.0 Hz, 1H), 4.74 (d,  $J$  = 12.0 Hz, 2H), 4.64 (d,  $J$  = 12.0 Hz, 2H), 4.07 (d,  $J$  = 4.8 Hz, 2H), 2.40 (br, 1H), 2.24 (q,  $J$  = 7.0 Hz, 2H), 1.93 (q,  $J$  = 7.0 Hz, 2H);  $^{13}\text{C}$  NMR (100 MHz,  $\text{CDCl}_3$ )  $\delta$  138.3, 131.6, 129.8, 128.6, 127.9, 127.8, 101.6, 67.4, 63.4, 32.8, 27.6; IR (neat) 3401, 3087, 3062, 3030, 2930-2868, 1670, 1605, 1496, 1453, 1385, 1353, 1208, 1124, 1023, 737  $\text{cm}^{-1}$ ; HRMS (APCI) calcd for  $\text{C}_{20}\text{H}_{24}\text{O}_3\text{Na}$   $[\text{M}+\text{Na}]^+$  355.1623, found 355.1608.

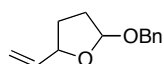

### 2-(benzyloxy)-5-vinyltetrahydrofuran (12)

The general cyclization procedure was followed with **11** (100 mg, 0.32 mmol),  $\text{Re}_2\text{O}_7$  (7.8 mg, 0.016 mmol), and  $\text{CH}_2\text{Cl}_2$  (5 mL). The reaction was stirred at rt for 30 min and then was quenched with pyridine (25  $\mu\text{L}$ ). After evaporation of the solvent, the crude mixture was purified by flash chromatography (1%-3% ethyl acetate in hexanes) to give the product (55 mg, 84%, dr = 6:4).  $^1\text{H}$  NMR (400 MHz,  $\text{CDCl}_3$ )  $\delta$  7.28-7.40 (m, 5H), 5.95 (ddd,  $J$  = 7.2, 10.0, 17.2 Hz, 0.4H), 5.90 (ddd,  $J$  = 6.8, 10.4, 17.2 Hz, 0.6H), 5.23-5.33 (m, 2H), 5.13-5.18 (m, 1H), 4.82 (d,  $J$  = 12.0 Hz, 0.4H), 4.81 (d,  $J$  = 12.0 Hz, 0.6H), 4.81 (q,  $J$  = 6.8 Hz, 0.6H), 4.50-4.55 (m, 1.4H), 2.20-2.30 (m, 0.6H), 2.08-2.16 (m, 1.5H), 1.88-2.04 (m, 1.5H), 1.61-1.70 (m, 0.8H);  $^{13}\text{C}$  NMR (100 MHz,  $\text{CDCl}_3$ ) 140.5, 138.5, 138.34, 138.32, 128.4, 127.94, 127.88, 127.5, 115.7, 115.6, 103.5, 103.2, 81.8, 78.9, 69.0, 68.6, 33.5, 32.1, 30.02, 30.0; IR (neat) 3064, 3030, 2924, 2853, 1605, 1455, 1273, 1205, 1025, 733  $\text{cm}^{-1}$ ; HRMS (APCI) calcd for  $\text{C}_{13}\text{H}_{16}\text{O}_2\text{Na}$   $[\text{M}+\text{Na}]^+$  227.1048, found 227.1049.

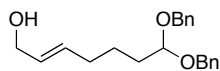

### (*E*)-7,7-bis(benzyloxy)hept-2-en-1-ol (13)

$^1\text{H}$  NMR (300 MHz,  $\text{CDCl}_3$ ) 7.33-7.44 (m, 10H), 5.62-5.76 (m, 2H), 4.83 (t,  $J$  = 6.0 Hz, 1H), 4.75 (d,  $J$  = 11.7 Hz, 2H), 4.65 (d,  $J$  = 11.7 Hz, 2H), 2.14 (q,  $J$  = 6.5 Hz, 2H), 1.86 (q,  $J$  = 7.2 Hz, 2H), 1.95 (p,  $J$  = 7.6 Hz, 2H);  $^{13}\text{C}$  NMR (75 MHz,  $\text{CDCl}_3$ )  $\delta$  138.4, 132.1, 129.8, 128.6, 127.9, 127.8, 102.1, 67.3, 63.4, 32.9, 32.1, 24.4; IR 3403, 3062, 3030, 2932, 2865, 1669, 1605, 1496, 1454, 1384, 1351, 1208, 1124, 1023, 736 (neat)  $\text{cm}^{-1}$ ; HRMS (ESI) calcd for  $\text{C}_{21}\text{H}_{26}\text{O}_3\text{Na}$   $[\text{M}+\text{Na}]^+$  349.1780, found 349.1754.

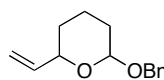

### 2-(benzyloxy)-6-vinyltetrahydro-2H-pyran (14)

The general rearrangement procedure was followed with **13** (100 mg, 0.31 mmol),  $\text{Re}_2\text{O}_7$  (7.4 mg, 0.015 mmol), and DCM (5 mL). The reaction was stirred at rt for 30 min and then

was quenched with pyridine (25  $\mu$ L). After evaporation of the solvent, the crude mixture was purified by flash chromatography (1%-3% ethyl acetate in hexanes) to give the product (55 mg, 81%, dr = 7:3).  $^1\text{H}$  NMR (400 MHz,  $\text{CDCl}_3$ )  $\delta$  7.28-7.41 (m, 5H), 5.95 (ddd,  $J$  = 5.2, 10.4, 17.2 Hz, 0.3H), 5.88 (ddd,  $J$  = 6.0, 10.8, 17.2 Hz, 0.7), 5.31 (dt,  $J$  = 1.6, 17.2 Hz, 0.3H), 5.26 (dt,  $J$  = 1.6, 17.6 Hz, 0.7H), 5.14 (dt,  $J$  = 1.4, 10.8 Hz, 0.3H), 5.13 (dt,  $J$  = 1.4, 10.4 Hz, 0.7H), 5.00 (d,  $J$  = 1.6 Hz, 0.7H), 4.95 (d,  $J$  = 12.0 Hz, 0.3H), 4.76 (d,  $J$  = 12.0 Hz, 0.7H), 4.65 (d,  $J$  = 12.0 Hz, 0.3H), 4.55 (dd,  $J$  = 2.0, 9.2 Hz, 0.3H), 4.52 (d,  $J$  = 12.0 Hz, 0.7H), 4.31 (dddd,  $J$  = 1.6, 1.6, 1.6, 5.6, 10.4 Hz, 0.7H), 3.93 (dddd,  $J$  = 1.2, 1.6, 2.4, 5.2, 11.2 Hz, 0.3H), 1.25-2.05 (m, 6H);  $^{13}\text{C}$  NMR (100 MHz,  $\text{CDCl}_3$ )  $\delta$  139.3, 138.6, 138.4, 138.1, 128.4, 128.0, 127.8, 127.6, 127.5, 114.8, 114.6, 101.0, 96.7, 76.5, 69.8, 69.7, 68.5, 31.1, 31.0, 30.8, 29.5, 22.0, 18.0; IR (neat) 3065, 3030, 2940, 2867, 1646, 1604, 1496, 1454, 1357, 1261, 1205, 1121, 1023, 736  $\text{cm}^{-1}$ ; HRMS (APCI) calcd for  $\text{C}_{14}\text{H}_{18}\text{O}_2\text{Na}$   $[\text{M}+\text{Na}]^+$  241.1204, found 241.1184.

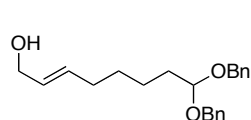

**(E)-8,8-bis(benzyloxy)oct-2-en-1-ol (15)**

$^1\text{H}$  NMR (400 MHz,  $\text{CDCl}_3$ )  $\delta$  7.34-7.46 (m, 10H), 5.64-5.76 (m, 2H), 4.83 (t,  $J$  = 5.6 Hz, 1H), 4.74 (d,  $J$  = 12.0 Hz, 2H), 4.65 (d,  $J$  = 12.0 Hz, 2H), 4.09 (d,  $J$  = 4.8 Hz, 2H), 2.64 (br, 1H), 2.12 (q,  $J$  = 6.1 Hz, 2H), 1.86 (q,  $J$  = 6.8 Hz, 2H), 1.41-1.58 (m, 4H);  $^{13}\text{C}$  NMR (100 MHz,  $\text{CDCl}_3$ )  $\delta$  138.4, 132.5, 129.5, 128.5, 127.9, 127.7, 102.2, 67.3, 63.4, 33.2, 32.2, 29.0, 24.3; IR (neat) 3406, 3062, 3030, 2932, 2861, 1669, 1605, 1494, 1454, 1384, 1351, 1205, 1125, 1022, 736  $\text{cm}^{-1}$ ; HRMS (APCI) calcd for  $\text{C}_{22}\text{H}_{28}\text{O}_3\text{Na}$   $[\text{M}+\text{Na}]^+$  363.1936, found 363.1925.

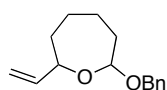

**2-(Benzyloxy)-7-vinyloxepane (16)**

The general rearrangement procedure was followed with **15** (100 mg, 0.29 mmol),  $\text{Re}_2\text{O}_7$  (7.1 mg, 0.015 mmol), and  $\text{CH}_2\text{Cl}_2$  (5 mL). The reaction was stirred at rt for 30 min and then was quenched with pyridine (25  $\mu$ L). After evaporation of the solvent, the crude mixture was purified by flash chromatography (1%-3% ethyl acetate in hexanes) to give the product (55 mg, 81%, dr = 9:1).  $^1\text{H}$  NMR (400 MHz,  $\text{CDCl}_3$ )  $\delta$  7.28-7.40 (m, 5H), 5.94 (ddd,  $J$  = 5.2, 10.4, 17.2 Hz, 1H), 5.34 (dt,  $J$  = 1.6, 17.2 Hz, 1H), 5.14 (dt,  $J$  = 1.6, 10.4 Hz, 0.1H), 5.13 (dt,  $J$  = 1.6, 10.4 Hz, 0.9H), 4.93 (dd,  $J$  = 5.6, 8.8 Hz, 0.9H), 4.88 (d,  $J$  = 12.0 Hz, 0.1H), 4.81 (d,  $J$  = 11.6 Hz, 0.9H), 4.70 (dd,  $J$  = 3.6, 7.6 Hz, 0.1H), 4.57 (d,  $J$  = 12.0 Hz, 0.1H), 4.52 (d,  $J$  = 11.6 Hz, 0.9H), 4.45 (dd,  $J$  = 5.2, 9.6 Hz, 0.9H), 4.01-4.04 (m, 0.1H), 2.13-2.22 (m, 1H), 1.88-1.98 (m, 1H), 1.65-1.87 (m, 3H), 1.36-1.60 (m, 3H);  $^{13}\text{C}$  NMR (100 MHz,  $\text{CDCl}_3$ )  $\delta$  140.3, 139.5, 138.4, 138.1, 128.4, 128.1, 128.0, 127.5, 113.6, 103.3, 100.3, 77.8, 71.1, 69.2, 69.1, 36.5, 35.9, 35.7, 35.4, 29.5, 24.7, 23.3, 22.5; IR (neat) 3064, 3030, 2931, 2856, 1645, 1605, 1496, 1452, 1356, 1206, 1131, 1055, 1024, 735  $\text{cm}^{-1}$ ; HRMS (APCI) calcd for  $\text{C}_{15}\text{H}_{20}\text{O}_2\text{Na}$   $[\text{M}+\text{Na}]^+$  255.1361, found 255.1359.

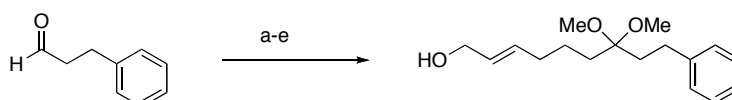

**Reagents and conditions**

a) Pentenylmagnesium bromide, THF, 0  $^\circ\text{C}$ , 89%. b) PCC, Celite,  $\text{CH}_2\text{Cl}_2$ , 96%. c)  $p$ -TsOH,  $(\text{MeO})_3\text{CH}$ , MeOH, 50  $^\circ\text{C}$ , 93%. d) Ethyl acrylate, Grubbs-Hoveyda metathesis catalyst,  $\text{CH}_2\text{Cl}_2$ , reflux. e) DIBAL-H,  $\text{CH}_2\text{Cl}_2$ , -78  $^\circ\text{C}$ .

**Scheme 4.** Synthesis of substrate **17**.

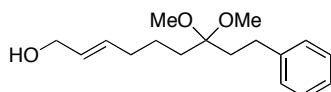

**(E)-7,7-Dimethoxy-9-phenylnon-2-en-1-ol (17)**

$^1\text{H}$  NMR (400 MHz,  $\text{C}_6\text{D}_6$ )  $\delta$  7.04-7.18 (m, 5H), 5.47-5.57 (m, 2H), 3.87 (br, 2H), 3.05 (s, 6H), 2.58-2.63 (m, 2H), 1.94-2.01 (m, 2H), 1.89-1.93 (m, 2H), 1.66-1.71 (m, 2H), 1.40 (p,  $J$  = 7.6 Hz, 2H);  $^{13}\text{C}$  NMR (100 MHz,  $\text{C}_6\text{D}_6$ )  $\delta$  142.1, 131.1, 130.3, 128.4, 128.2, 125.8, 102.8, 63.1, 47.2, 34.7, 32.3, 32.2, 30.4, 23.5; IR (neat) 3400, 3025, 2949, 2829, 1669, 1603, 1495, 1454, 1368, 1181, 1054, 971, 743  $\text{cm}^{-1}$ ; HRMS (ESI) calcd for  $\text{C}_{17}\text{H}_{26}\text{O}_3\text{Na}$   $[\text{M}+\text{Na}]^+$  301.1780, found 301.1811.

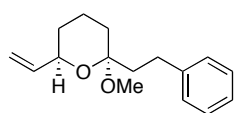

**(±)-(2S, 6R)-2-methoxy-2-phenethyl-6-vinyltetrahydro-2H-pyran (18)**

The general rearrangement cyclization procedure was followed with **17** (11 mg, 0.039 mmol),  $\text{Re}_2\text{O}_7$  (2.0 mg, 0.004 mmol), and  $\text{CD}_2\text{Cl}_2$  (1.0 mL). The reaction was stirred at 0 °C for 2 min, after which the cold bath was removed, and the reaction was stirred for another 8 min and then was quenched with pyridine (25  $\mu\text{L}$ ).  $\text{Me}_2(\text{Bn})\text{SiH}$  (5  $\mu\text{L}$ ) was added as an internal standard and crude NMR was used to determine the yield of 85%.  $^1\text{H}$  NMR (400 MHz,  $\text{C}_6\text{D}_6$ )  $\delta$  7.12-7.19 (m, 2H), 7.04-7.11 (m, 3H), 5.88 (ddd,  $J$  = 5.6, 9.8, 17.2 Hz, 1H), 5.29 (dt,  $J$  = 1.8, 17.2 Hz, 1H), 5.03 (dt,  $J$  = 1.6, 17.2 Hz, 1H), 4.08 (dddd,  $J$  = 1.2, 1.6, 2.4, 5.2, 11.6 Hz, 1H), 3.07 (s, 3H), 2.53-2.69 (m, 2H), 1.99-2.09 (m, 1H), 1.81-1.98 (m, 2H), 1.72 (dddd,  $J$  = 1.6, 1.6, 1.6, 12.8 Hz, 1H) 1.36-1.51 (m, 2H), 1.19-1.30 (m, 2H);  $^{13}\text{C}$  NMR (100 MHz,  $\text{C}_6\text{D}_6$ )  $\delta$  142.3, 139.8, 128.4, 128.3, 125.7, 113.3, 99.1, 70.7, 46.7, 38.4, 32.2, 31.0, 30.0 18.9; IR (neat) 3063, 3026, 2941, 2867, 1646, 1603, 1496, 1454, 1367, 1273, 1216, 1104, 1024, 924, 755, 738  $\text{cm}^{-1}$ ; HRMS (ESI) calcd for  $\text{C}_{16}\text{H}_{22}\text{O}_2\text{Na}$   $[\text{M}+\text{Na}]^+$  269.1517, found 269.1548.

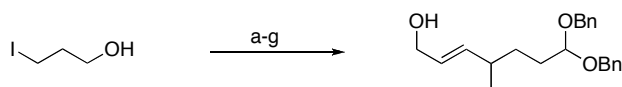

**Reagents and conditions**

a) IBX, DMSO,  $\text{CH}_2\text{Cl}_2$ . b)  $\text{BnOH}$ ,  $p\text{-TsOH}$ ,  $\text{Na}_2\text{S}_2\text{O}_4$ ,  $\text{CH}_2\text{Cl}_2$ , 27% (two steps). c) LDA, propionic acid pseudoephedrine amide,  $\text{LiCl}$ , THF, 0 °C, 73%. d)  $\text{BH}_3\cdot\text{NH}_3$ , LDA, THF. e) IBX, DMSO, 73% (two steps). f)  $\text{NaH}$ , triethyl phosphonoacetate, THF, 0 °C, 99%. g) DIBAL-H,  $\text{CH}_2\text{Cl}_2$ , -78 °C, 92%

**Scheme 5.** Synthesis of substrate **19**.

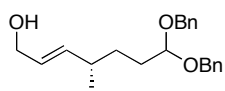

**(S,E)-7,7-Bis(benzyloxy)-4-methylhept-2-en-1-ol (19)**

$^1\text{H}$  NMR (300 MHz,  $\text{CDCl}_3$ )  $\delta$  7.31-7.45 (m, 10H), 5.53-5.66 (m, 2H), 4.79 (t,  $J$  = 5.7 Hz, 1H), 4.73 (d,  $J$  = 11.7 Hz, 2H), 4.63 (d,  $J$  = 11.7 Hz, 2H), 4.10 (d,  $J$  = 4.2 Hz, 2H), 2.19 (heptet,  $J$  = 6.6 Hz, 1H), 1.94 (br, 1H), 1.74-1.88 (m, 2H), 1.40-1.54 (m, 2H), 1.06 (d,  $J$  = 6.9 Hz, 3H);  $^{13}\text{C}$  NMR (75 MHz,  $\text{CDCl}_3$ )  $\delta$  138.3, 138.1, 128.5, 127.9, 127.7, 102.3, 67.28, 67.26, 67.23, 63.6, 36.3, 31.7, 31.2, 20.5; IR (neat) 3403, 3063, 3030, 2926, 2867, 1667, 1605, 1493, 1454, 1380, 1349, 1208, 1122, 1022, 736  $\text{cm}^{-1}$ ; HRMS (ESI) calcd for  $\text{C}_{22}\text{H}_{28}\text{O}_3\text{Na}$   $[\text{M}+\text{Na}]^+$  363.1936, found 363.1973.

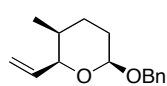

**(2S,3S,6S)-6-(Benzyloxy)-3-methyl-2-vinyltetrahydro-2H-pyran (20)**

The general rearrangement procedure was followed with **19** (50 mg, 0.16 mmol),  $\text{Re}_2\text{O}_7$  (2 mg, 0.004 mmol), and  $\text{CH}_2\text{Cl}_2$  (5 mL). The reaction was stirred at rt for 20 min and then was quenched with pyridine (25  $\mu\text{L}$ ). After evaporation of the solvent, the crude mixture was purified by flash chromatography (1%-3% ethyl acetate in hexanes) to give the product (33 mg, 100%, dr = 3:3:1:1).  $^1\text{H}$  NMR (400 MHz,  $\text{C}_6\text{D}_6$ )  $\delta$  7.29-7.34 (m, 2H), 7.16-7.20 (m, 2H), 7.07-7.12 (m, 1H), 5.74 (ddd,  $J$  = 4.8, 10.8, 17.2 Hz, 1H), 5.39 (dt,  $J$  = 2.0, 17.2 Hz, 1H), 5.10 (dt,  $J$  = 2.0, 10.8 Hz, 2H), 4.85 (d,  $J$  = 3.2 Hz, 1H), 4.70 (d,  $J$  = 12.0 Hz, 1H), 4.51 (dddd,  $J$  = 0.5, 1.4, 1.6, 2.4 Hz, 1H), 4.37 (d,  $J$  = 12.0 Hz, 1H), 2.13 (dddd,  $J$  = 4.6, 4.6, 13.6, 13.6 Hz, 1H), 1.68 (dddd,  $J$  = 4.4, 4.4, 14.0, 14.0 Hz, 1H), 1.54 (m, 1H), 1.45 (dddd,  $J$  = 1.2, 2.8, 4.4, 14.0 Hz, 1H), 1.21 (dddd,  $J$  = 2.4, 2.8, 5.2, 13.6 Hz, 1H), 0.93 (d,  $J$  = 7.2 Hz, 3H);  $^{13}\text{C}$  NMR (100 MHz,  $\text{C}_6\text{D}_6$ )  $\delta$  138.7, 138.4, 128.2, 127.8, 127.3, 113.6, 96.4, 70.8, 68.3, 31.3, 25.3, 24.2, 11.4; IR (neat) 3065, 3030, 2938, 2892, 1645, 1606, 1453, 1351, 1211, 1126, 1019, 729  $\text{cm}^{-1}$ ; HRMS (APCI) calcd for  $\text{C}_{15}\text{H}_{20}\text{O}_2\text{Na}$   $[\text{M}+\text{Na}]^+$  255.1361, found 255.1372.

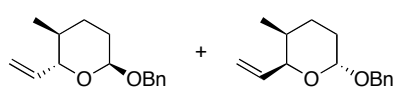

**(2R, 3S, 6S)-6-(Benzyloxy)-3-methyl-2-vinyltetrahydro-2H-pyran and (2S, 3S, 6R)-6-(benzyloxy)-3-methyl-2-vinyltetrahydro-2H-pyran**

$^1\text{H}$  NMR (400 MHz,  $\text{C}_6\text{D}_6$ )  $\delta$  7.28-7.36 (m, 2H), 7.13-7.19 (m, 2H), 7.05-7.11 (m, 1H), 5.87 (ddd,  $J$  = 6.8, 10.4, 17.2 Hz, 0.75H), 5.81 (ddd,  $J$  = 5.2, 10.8, 17.2 Hz, 0.25H), 5.35 (dt,  $J$  = 2, 17.2 Hz, 0.25H), 5.27 (ddd  $J$  = 0.8, 2.0, 17.2 Hz, 0.75H), 5.06-5.11 (m, 1H), 4.96 (d,  $J$  = 12.0 Hz, 0.25H), 4.89 (d,  $J$  = 3.2 Hz, 0.75H), 4.73 (d,  $J$  = 12.0 Hz, 0.75H), 4.53 (d,  $J$  = 12.0 Hz, 0.25H), 4.41 (dd,  $J$  = 2.8, 8.4 Hz, 0.25H), 4.40 (d,  $J$  = 12.0 Hz, 0.75H), 3.91 (dd,  $J$  = 7.2, 9.6 Hz, 0.75H), 3.84 (dddd,  $J$  = 1.6, 1.6, 3.8, 5.8 Hz, 0.25H), 1.45-1.85 (m, 3H), 1.25-1.45 (m, 2H), 0.87 (d,  $J$  = 6.4 Hz, 0.75H),



0.71 (d,  $J = 6.4$  Hz, 2.25H);  $^{13}\text{C}$  NMR (100 MHz,  $\text{C}_6\text{D}_6$ )  $\delta$  138.8, 138.7, 138.2, 137.7, 128.21, 128.17, 127.8, 127.3, 116.0, 114.3, 100.9, 95.9, 69.3, 68.2, 35.1, 31.4, 30.2, 28.3, 26.8, 26.7, 17.7, 12.5; IR (neat) 3066, 3030, 2930, 2876, 1645, 1604, 1455, 1376, 1232, 1123, 1023, 923, 730  $\text{cm}^{-1}$ ; HRMS (APCI) calcd for  $\text{C}_{15}\text{H}_{20}\text{O}_2\text{Na}$   $[\text{M}+\text{Na}]^+$  255.1361, found 255.1377.

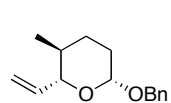

**(2R, 3S, 6R)-6-(Benzyloxy)-3-methyl-2-vinyltetrahydro-2H-pyran**

$^1\text{H}$  NMR (400 MHz,  $\text{C}_6\text{D}_6$ )  $\delta$  7.33-7.37 (m, 2H), 7.13-7.20 (m, 2H), 7.06-7.12 (m, 2H), 5.89 (ddd,  $J = 6.8, 10.4, 17.2$  Hz, 1H), 5.29 (ddd,  $J = 1.2, 2.0, 17.2$  Hz, 1H), 5.09 (ddd,  $J = 0.8, 2.0, 10.4$  Hz, 1H), 4.98 (d,  $J = 12.0$  Hz, 1H), 4.57 (d,  $J = 12.0$  Hz, 1H), 4.37 (dd,  $J = 2.8, 8.8$  Hz, 1H), 3.25 (dd,  $J = 2.8$  Hz, 10), 1.60-1.75 (m, 2H), 1.41-1.48 (dt,  $J = 3.6, 13.6$  Hz, 2H), 1.15-1.28 (m, 2H), 0.80-0.91 (m, 2H), 0.61 (d,  $J = 6.4$  Hz, 3H);  $^{13}\text{C}$  NMR (100 MHz,  $\text{C}_6\text{D}_6$ )  $\delta$  138.8, 137.6, 128.2, 127.8, 127.3, 115.8, 100.7, 82.7, 69.5, 34.7, 31.7, 31.1, 16.8; IR (neat) 3065, 3029, 2952, 2929, 2873, 2853, 1645, 1606, 1496, 1362, 1146, 1055, 1091, 920, 736  $\text{cm}^{-1}$ ; HRMS (APCI) calcd for  $\text{C}_{15}\text{H}_{20}\text{O}_2\text{Na}$   $[\text{M}+\text{Na}]^+$  255.1361, found 255.1342.

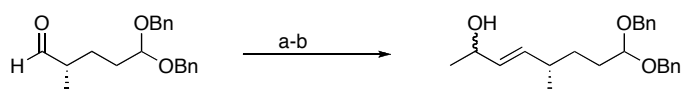

**Reagents and conditions**

a) Diethyl 2-oxopropylphosphonoacetate, NaH, THF, 83%. b) CBS-catalyst,  $\text{BH}_3\cdot\text{THF}$ , THF,  $-25^\circ\text{C}$ , 80%.

**Scheme 6. Synthesis of substrate 21.**

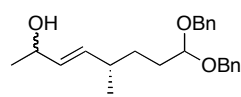

**(5S,E)-8,8-Bis(benzyloxy)-5-methyloct-3-en-2-ol (21)**

$^1\text{H}$  NMR (400 MHz,  $\text{CDCl}_3$ )  $\delta$  7.29-7.44 (m, 10H), 5.44-5.56 (m, 2H), 4.76 (t,  $J = 5.6$  Hz, 1H), 4.69 (d,  $J = 12.0$  Hz, 2H), 4.59 (d,  $J = 12.0$  Hz, 2H), 4.26 (p,  $J = 5.6$  Hz, 1H), 2.07-2.18 (m, 1H), 1.72-1.82 (m, 2H), 1.65 (br, 1H), 1.37-1.49 (m, 2H), 1.27 (d,  $J = 6.4$  Hz, 3H), 1.02 (d,  $J = 6.8$  Hz, 1H), 1.01 (d,  $J = 6.8$  Hz, 2H);  $^{13}\text{C}$  NMR (100 MHz,  $\text{CDCl}_3$ )  $\delta$  138.3, 136.1, 136.0, 133.08, 133.04, 128.5, 127.8, 127.7, 102.27, 102.25, 68.9, 68.8, 67.24, 67.15, 67.13, 36.2, 36.1, 31.7, 31.6, 31.1, 23.6, 23.5, 20.6, 20.5; IR (neat) 3417, 3063, 3030, 2958, 2869, 1666, 1605, 1496, 1453, 1369, 1207, 1124, 1023, 972, 736  $\text{cm}^{-1}$ ; HRMS (ESI) calcd for  $\text{C}_{23}\text{H}_{30}\text{O}_3\text{Na}$   $[\text{M}+\text{Na}]^+$  377.2093, found 377.2063.

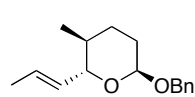

**(2S, 3S, 6S)-6-(Benzyloxy)-3-methyl-2-((E)-prop-1-en-1-yl)tetrahydro-2H-pyran (22)**

The general cyclization procedure was followed with **21** (50 mg, 0.14 mmol),  $\text{Re}_2\text{O}_7$  (3 mg, 0.007 mmol), and  $\text{CH}_2\text{Cl}_2$  (3 mL). The reaction was stirred at rt for 30 min and then was quenched with pyridine (25  $\mu\text{L}$ ). After evaporation of the solvent, the crude mixture was purified by flash chromatography (1%-3% ethyl acetate in hexanes) to give the product (30 mg, 86%, dr = 3:1, *trans*:*cis* > 10:1 as determined by the  $^1\text{H}$  NMR spectrum of the crude mixture).  $^1\text{H}$  NMR (400 MHz,  $\text{CD}_2\text{Cl}_2$ )  $\delta$  7.24-7.36 (m, 5H), 6.66 (dq,  $J = 6.4, 15.2$  Hz, 1H), 5.39 (ddq,  $J = 1.6, 8, 15.2$  Hz, 1H), 4.88 (dd,  $J = 2.0, 2.4$  Hz, 1H), 4.67 (d,  $J = 12.0$  Hz, 1H), 4.42 (d,  $J = 12.0$  Hz, 1H), 3.74 (dd,  $J = 8.8, 9.2$  Hz, 1H), 1.66-1.75 (m, 2H), 1.70 (dd,  $J = 1.6, 6.4$  Hz, 3H), 1.48-1.58 (m, 2H), 1.35-1.47 (m, 1H), 0.77 (d,  $J = 6.4$  Hz, 3H);  $^{13}\text{C}$  NMR (100 MHz,  $\text{CD}_2\text{Cl}_2$ )  $\delta$  138.8, 131.2, 128.8, 128.2, 127.8, 127.3, 96.4, 76.4, 68.3, 35.0, 30.2, 26.7, 17.8, 17.5. IR (neat) 3063, 3030, 2929, 2876, 1676, 1604, 1454, 1376, 1230, 1049, 1022, 972, 920, 730  $\text{cm}^{-1}$ ; HRMS (ESI) calcd for  $\text{C}_{16}\text{H}_{22}\text{O}_2\text{Na}$   $[\text{M}+\text{Na}]^+$  269.1517, found 269.1558.

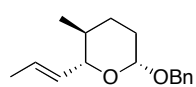

**(2S, 3S, 6R)-6-(Benzyloxy)-3-methyl-2-((E)-prop-1-en-1-yl)tetrahydro-2H**

$^1\text{H}$  NMR (400 MHz,  $\text{C}_6\text{D}_6$ )  $\delta$  7.35-7.38 (m, 2H), 7.14-7.19 (m, 2H), 7.05-7.11 (m, 1H), 5.67 (ddq,  $J = 0.8, 6.0, 15.2$  Hz, 1H), 5.58 (ddq,  $J = 1.6, 6.8, 15.2$  Hz, 1H), 5.01 (d,  $J = 12.0$  Hz, 1H), 4.59 (d,  $J = 12.0$  Hz, 1H), 4.40 (dd,  $J = 2.8, 8.8$  Hz, 1H), 3.28 (dd,  $J = 6.8, 9.6$  Hz, 1H), 1.63-1.79 (m, 2H), 1.59 (d,  $J = 6.4$  Hz, 3H), 1.49 (dq,  $J = 3.6, 13.2$  Hz, 1H), 1.19-1.33 (m, 1H), 0.83-0.95 (m, 1H), 0.65 (d,  $J = 6.8$  Hz, 3H);  $^{13}\text{C}$  NMR (100 MHz,  $\text{C}_6\text{D}_6$ )  $\delta$  138.8, 131.3, 128.2, 127.8, 127.4, 127.2,

100.7, 82.6, 69.4, 34.9, 31.8, 31.2, 17.5, 17.1; IR (neat) 3030, 2950, 2929, 2853, 1676, 1606, 1454, 1365, 1146, 1102, 1078, 1031, 966, 735  $\text{cm}^{-1}$ ; HRMS (ESI) calcd for  $\text{C}_{16}\text{H}_{22}\text{O}_2\text{Na}$   $[\text{M}+\text{Na}]^+$  269.1517, found 269.1529.

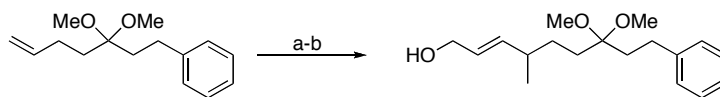

**Reagents and conditions**

a) Vinyl oxirane, Grubbs-Hoveyda metathesis catalyst,  $\text{CH}_2\text{Cl}_2$ , reflux, 25%. b)  $\text{Me}_2\text{CuCNLi}$ , THF,  $-78^\circ\text{C}$  to rt, 60%

**Scheme 7.** Synthesis of substrate **23**.

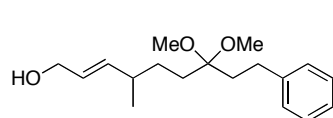

**(E)-7,7-dimethoxy-4-methyl-9-phenylnon-2-en-1-ol (23)**

$^1\text{H}$  NMR (500 MHz,  $\text{C}_6\text{D}_6$ )  $\delta$  7.05-7.21 (m, 5H), 5.48 (dt,  $J = 5.5, 15.5$ , 1H), 5.42 (ddt,  $J = 1.0, 7.5, 15.5$  Hz, 1H), 3.86 (br, 2H), 3.07 (s, 3H), 3.06 (s, 3H), 2.62-2.66 (m, 2H), 1.95-2.04 (m, 3H), 1.65-1.80 (m, 2H), 1.34 (q,  $J = 7.0$ , 2H), 0.95 (d,  $J = 7.0$  Hz, 3H);  $^{13}\text{C}$  NMR (125 MHz,  $\text{C}_6\text{D}_6$ )  $\delta$  142.1, 136.8, 128.6, 128.4, 128.3, 125.8, 102.9, 63.1, 47.2, 36.7, 34.6, 30.9, 30.4, 30.3, 20.4; IR (neat) 3403, 3025, 2955, 2869, 1667, 1603, 1454, 1374, 1299, 1185, 1058, 972, 741  $\text{cm}^{-1}$ ; HRMS (APCI) calcd for  $\text{C}_{18}\text{H}_{29}\text{O}_3$   $[\text{M}+\text{H}]^+$  293.2117, found 293.2088.

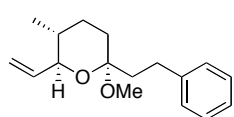

**(±)-(2S, 5R, 6S)-2-Methoxy-5-methyl-2-phenethyl-6-vinyltetrahydro-2H-pyran (24)**

The general rearrangement procedure was followed with **23** (50 mg, 0.17 mmol),  $\text{Re}_2\text{O}_7$  (4 mg, 0.008 mmol), and  $\text{CD}_2\text{Cl}_2$  (3.0 mL). The reaction was stirred at  $0^\circ\text{C}$  for 30 min, after which the cold bath was removed, the reaction was stirred for another 10 min, then was quenched with pyridine (25  $\mu\text{L}$ ).  $\text{BnMe}_2\text{SiH}$  (5  $\mu\text{L}$ ) was added as an internal standard, and a  $^1\text{H}$  NMR spectrum was taken of the crude mixture to determine the yield (81%, dr = 10:1).  $^1\text{H}$  NMR (500 MHz,  $\text{CD}_2\text{Cl}_2$ )  $\delta$  7.24-7.29 (m, 2H), 7.14-7.22 (m, 2H), 5.78 (ddd,  $J = 7.5, 10.0, 17.5$  Hz, 1H), 5.23 (dd,  $J = 17.5, 2.0$  Hz, 1H), 5.14 (dd,  $J = 10.0, 17.5$  Hz, 1H), 3.60 (dd,  $J = 7.5, 10.0$  Hz, 1H), 2.61 (m, 2H), 1.97 (ddd,  $J = 5.0, 12.0, 14.0$  Hz, 2H), 1.81-1.85 (m, 1H), 1.76 (ddd,  $J = 4.5, 12.5, 14.0$  Hz, 2H), 1.50-1.62 (m, 3H), 1.31-1.38 (m, 1H), 0.82 (d,  $J = 6.5$  Hz, 3H);  $^{13}\text{C}$  NMR (125 MHz,  $\text{CD}_2\text{Cl}_2$ ) 142.4, 138.1, 128.3, 128.2, 125.7, 116.5, 98.8, 78.1, 47.1, 38.0, 34.5, 32.9, 29.8, 27.6, 17.5; IR 3063, 3026, 2953, 2875, 1645, 1605, 1496, 1455, 1368, 1236, 1079, 1041, 932, 740 (neat)  $\text{cm}^{-1}$ ; HRMS (ESI) calcd for  $\text{C}_{17}\text{H}_{24}\text{O}_2\text{Na}$   $[\text{M}+\text{Na}]^+$  283.1674, found 283.1700.

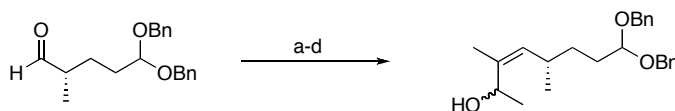

**Reagents and conditions**

a) Diethyl phosphonopropionate, NaH, THF, 65%. b) DIBAL-H,  $\text{CH}_2\text{Cl}_2$ ,  $-78^\circ\text{C}$ , 95%. c) IBX, DMSO, 100%. d)  $\text{MeMgBr}$ , THF,  $0^\circ\text{C}$ , 100%, dr = 2.2:1.

**Scheme 8.** Synthesis of substrate **25**.

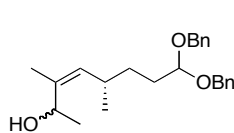

**(5S, Z)-8,8-Bis(benzyloxy)-3,5-dimethyloct-3-en-2-ol (25)**

Major isomer:  $^1\text{H}$  NMR (400 MHz,  $\text{C}_6\text{D}_6$ )  $\delta$  7.31-7.36 (m, 2H), 7.16-7.21 (m, 2H), 7.09-7.12 (m, 1H), 4.83 (d,  $J = 10.0$  Hz, 1H), 4.71 (t,  $J = 5.6$  Hz, 1H), 4.61 (dd,  $J = 4.8, 12.0$  Hz, 2H), 4.52-4.58 (m, 1H), 4.49 (d,  $J = 12.0$  Hz, 2H), 2.27-2.39 (m, 1H), 1.70-1.87 (m, 2H), 1.70 (d,  $J = 0.8$  Hz, 3H), 1.38-1.46 (m, 1H), 1.22-1.34 (m, 1H), 1.13 (dd,  $J = 2.8, 6.4$  Hz, 3H), 0.84 (d,  $J = 6.4$  Hz, 3H);  $^{13}\text{C}$  NMR (100 MHz,  $\text{CD}_2\text{Cl}_2$ )  $\delta$  138.62, 138.58, 137.2, 132.5, 128.3, 127.8, 127.9, 127.50, 127.49, 102.55, 67.4, 67.2, 65.6, 32.5, 31.4, 31.3, 21.52, 21.49, 16.8; IR (neat) 3439, 3063, 3030, 2954, 2867, 1605, 1496, 1453, 1375, 1121, 1024, 736  $\text{cm}^{-1}$ ; HRMS (ESI) calcd for  $\text{C}_{24}\text{H}_{32}\text{O}_3\text{Na}$   $[\text{M}+\text{Na}]^+$  391.2249, found 391.2263. Minor isomer:  $^1\text{H}$  NMR (400 MHz,  $\text{C}_6\text{D}_6$ )  $\delta$  7.29-7.35

(m, 2H), 7.14-7.21 (m, 2H), 7.07-7.13 (m, 1H), 4.85 (d,  $J = 9.6$  Hz, 1H), 4.68 (t,  $J = 5.6$  Hz, 1H), 4.60 (dd,  $J = 3.6, 12.0$  Hz, 2H), 5.53-4.60 (br, 1H), 4.47 (d,  $J = 12.0$  Hz, 2H), 2.25-2.40 (m, 1H), 1.60-1.80 (m, 2H), 1.70 (s, 3H), 1.35-1.45 (m, 1H), 1.23-1.34 (m, 1H), 1.50 (dd,  $J = 1.2, 6.4$  Hz, 3H), 0.60 (d,  $J = 6.4$  Hz, 3H);  $^{13}\text{C}$  NMR (100 MHz,  $\text{C}_6\text{D}_6$ )  $\delta$  138.8, 137.4, 132.2, 128.3, 127.6, 127.4, 102.1, 66.9, 66.8, 65.4, 32.6, 31.5, 31.4, 21.6, 21.5, 17.1; IR (neat) 3415, 3063, 3030, 2920, 1605, 1496, 1453, 1376, 1119, 1024, 898,  $735\text{ cm}^{-1}$ ; HRMS (APCI) calcd for  $\text{C}_{24}\text{H}_{32}\text{O}_3\text{Na}$   $[\text{M}+\text{Na}]^+$  391.2249, found 391.2242.

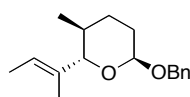

**(2S, 3S, 6S)-6-(Benzyloxy)-2-((E)-but-2-en-2-yl)-3-methyltetrahydro-2H-pyran (26)**

The general cyclization procedure was followed with **25** (50 mg, 0.14 mmol),  $\text{Re}_2\text{O}_7$  (3 mg, 0.007 mmol), and  $\text{CH}_2\text{Cl}_2$  (1.5 mL), the reaction was stirred at rt for 30 min and then was quenched with pyridine (25  $\mu\text{L}$ ). After evaporation of the solvent, the crude mixture was purified by flash chromatography (1%-3% ethyl acetate in hexanes) to give the product (32 mg, 91%, dr = 3:1).  $^1\text{H}$  NMR (400 MHz,  $\text{C}_6\text{D}_6$ )  $\delta$  7.34-7.37 (m, 2H), 7.14-7.20 (m, 2H), 7.06-7.11 (m, 1H), 5.44 (qq,  $J = 1.2, 6.8$  Hz, 1H), 4.92 (d,  $J = 3.2$  Hz, 1H), 4.79 (d,  $J = 12.4$  Hz, 1H), 4.43 (d,  $J = 12.4$  Hz, 1H), 3.92 (d,  $J = 10.4$  Hz, 1H), 1.66-1.78 (m, 2H), 1.71 (d,  $J = 1.2$  Hz, 3H), 1.52-1.63 (m, 2H), 1.53 (dq,  $J = 1.2, 6.4$  Hz, 3H), 1.39-1.46 (m, 1H), 0.68 (d,  $J = 6.4$  Hz, 3H);  $^{13}\text{C}$  NMR (100 MHz,  $\text{C}_6\text{D}_6$ )  $\delta$  139.0, 135.2, 128.2, 127.6, 127.2, 122.8, 96.1, 91.8, 68.1, 32.1, 20.4, 27.0, 17.8, 12.7, 10.8; IR (neat) 3030, 2950, 2927, 2888, 1671, 1604, 1485, 1376, 1231, 1123, 1020, 920,  $727\text{ cm}^{-1}$ ; HRMS (APCI) calcd for  $\text{C}_{17}\text{H}_{24}\text{O}_2\text{Na}$   $[\text{M}+\text{Na}]^+$  283.1674, found 283.1665.

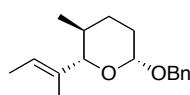

**(2S, 3S, 6R)-6-(Benzyloxy)-2-((E)-but-2-en-2-yl)-3-methyltetrahydro-2H-pyran**

$^1\text{H}$  NMR (400 MHz,  $\text{C}_6\text{D}_6$ )  $\delta$  7.32-7.37 (m, 2H), 7.13-7.19 (m, 2H), 7.05-7.10 (m, 1H), 5.42 (q,  $J = 6.4$  Hz, 1H), 4.97 (d,  $J = 12.0$  Hz, 1H), 4.57 (d,  $J = 12.0$  Hz, 1H), 4.20 (dd,  $J = 2.4, 9.2$  Hz, 1H), 1.62-1.79 (m, 2H), 1.72 (s, 3H), 1.53 (d,  $J = 6.8$  Hz, 3H), 1.48-1.56 (m, 1H), 1.37-1.48 (m, 1H), 0.85-0.97 (m, 1H), 0.58 (d,  $J = 6.4$  Hz, 3H);  $^{13}\text{C}$  NMR (100 MHz,  $\text{C}_6\text{D}_6$ )  $\delta$  138.9, 135.2, 128.1, 127.8, 127.2, 122.4, 101.0, 88.5, 69.4, 31.9, 31.7, 31.2, 17.0, 12.7, 12.7, 11.1; IR (neat) 3063, 3029, 2950, 2926, 2854, 1672, 1607, 1454, 1375, 1308, 1148, 1056, 1021,  $734\text{ cm}^{-1}$ ; HRMS (APCI) calcd for  $\text{C}_{17}\text{H}_{24}\text{O}_2\text{Na}$   $[\text{M}+\text{Na}]^+$  283.1674, found 283.1685.

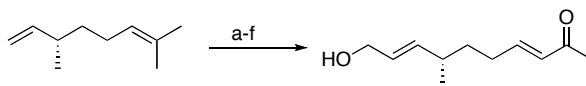

**Reagents and conditions**

a)  $\text{O}_3$ ,  $\text{CH}_2\text{Cl}_2$ ,  $-78^\circ\text{C}$ , then  $\text{Me}_2\text{S}$ , 33%. b)  $(\text{MeO})_3\text{CH}$ ,  $p\text{-TsOH}$ ,  $\text{MeOH}$ ,  $50^\circ\text{C}$ , 52%.  
c) Methyl acrylate, Grubbs-Hoveyda second generation metathesis catalyst,  $\text{CH}_2\text{Cl}_2$ , reflux, 85%. d) DIBAL-H,  $\text{CH}_2\text{Cl}_2$ ,  $-78^\circ\text{C}$ , 58%. e)  $\text{HOAc}$ ,  $\text{H}_2\text{O}$ , 95%.  
f)  $(\text{EtO})_2\text{P}(\text{O})\text{CH}_2\text{C}(\text{O})\text{CH}_3$ ,  $\text{NaH}$ , THF, 58%.

**Scheme 9.** Synthesis of substrate **27**.

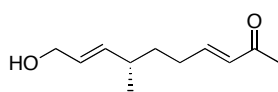

**(7S,3E,8E)-10-hydroxy-7-methyldeca-3,8-dien-2-one (27)**

$^1\text{H}$  NMR (300 MHz,  $\text{CD}_2\text{Cl}_2$ )  $\delta$  6.77 (dt,  $J = 6.9, 15.9$  Hz, 1H), 6.01 (dt,  $J = 1.5, 15.9$  Hz, 1H), 5.45-5.64 (m, 2H), 4.03 (d,  $J = 5.1$  Hz, 2H), 2.08-2.26 (m, 4H), 2.18 (s, 3H), 1.39-1.49 (m, 2H), 0.99 (d,  $J = 6.6$  Hz, 3H);  $^{13}\text{C}$  NMR (75 MHz,  $\text{CD}_2\text{Cl}_2$ )  $\delta$  198.6, 148.5, 137.1, 131.2, 128.5, 63.2, 36.0, 35.0, 30.2, 26.6, 20.2; IR (neat) 3426, 2957, 2924, 2868, 1672, 1625, 1427, 1363,  $1256, 975\text{ (neat) cm}^{-1}$ ; HRMS (ESI) calcd for  $\text{C}_{11}\text{H}_{18}\text{O}_2\text{Na}$   $[\text{M}+\text{Na}]^+$  205.1204, found 205.1235.

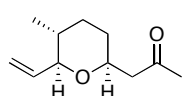

**1-((2R,5S,6R)-5-methyl-6-vinyltetrahydro-2H-pyran-2-yl)propan-2-one (28)**

The general rearrangement procedure was followed with **27** (26.5 mg, 0.145 mmol),  $\text{Re}_2\text{O}_7$  (3.5 mg, 0.007 mmol), and  $\text{CH}_2\text{Cl}_2$  (1.5 mL). The reaction was stirred at rt for 24hr and then quenched with pyridine (25  $\mu\text{L}$ ).  $\text{Me}_2(\text{Bn})\text{SiH}$  (5  $\mu\text{L}$ ) was added as an internal standard and crude NMR was used to determine the yield of 88%.  $^1\text{H}$  NMR (400 MHz,  $\text{CH}_2\text{Cl}_2$ )  $\delta$  5.75 (ddd,  $J = 6.8, 10.4$  Hz, 17.2, 1H), 5.18 (ddd,  $J = 1.2, 2.0, 17.2$  Hz, 1H), 5.11 (ddd,  $J = 0.8, 2.0, 10.4$  Hz, 1H), 3.71-3.78 (m, 1H), 3.36 (dd,  $J = 7.2, 8.8$  Hz, 1H), 2.62 (dd,  $J = 7.6, 15.6$  Hz, 1H), 2.42 (dd,  $J = 5.2, 15.6$  Hz, 1H), 2.12 (s,



3H), 1.77-1.82 (m, 1H), 1.60-1.65 (m, 1H), 1.17-1.36 (m, 3H), 0.78 (d,  $J = 6.4$  Hz, 3H);  $^{13}\text{C}$  NMR (100 MHz,  $\text{CH}_2\text{Cl}_2$ )  $\delta$  207.0, 137.9, 116.2, 85.1, 73.7, 50.2, 34.9, 32.3, 31.8, 30.5, 17.4; IR (neat) 3079, 2927, 2873, 2851, 1716, 1457, 1425, 1356, 1225, 1152, 1072, 1018, 991, 923  $\text{cm}^{-1}$ ; HRMS (ESI) calcd for  $\text{C}_{11}\text{H}_{18}\text{O}_2\text{Na}$   $[\text{M}+\text{Na}]^+$  205.1204, found 205.1224.

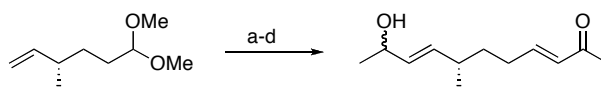

**Reagents and conditions**

a) Methyl vinyl ketone, Grubbs-Hoveyda second generation metathesis catalyst,  $\text{CH}_2\text{Cl}_2$ , reflux, 85%. b) DIBAL-H,  $\text{CH}_2\text{Cl}_2$ ,  $-78^\circ\text{C}$ , 45%, two steps. c) HOAc,  $\text{H}_2\text{O}$ , 82%. d)  $(\text{EtO})_2\text{P}(\text{O})\text{CH}_2\text{C}(\text{O})\text{CH}_3$ , NaH, THF, 53%.

**Scheme 10.** Synthesis of substrate **29**.

**(3*E*,7*S*,8*E*)-10-hydroxy-7-methylundeca-3,8-dien-2-one (29)**  
 $^1\text{H}$  NMR (300 MHz,  $\text{CD}_2\text{Cl}_2$ )  $\delta$  6.76 (dt,  $J = 6.9, 15.9$  Hz, 1H), 6.03 (dd,  $J = 1.2, 15.9$  Hz, 1H), 5.38-5.52 (m, 2H), 4.26 (q,  $J = 6.0$  Hz, 2H), 2.21 (s, 3H), 2.04-2.21 (m, 3H), 1.38-1.47 (m, 2H), 1.23 (d,  $J = 6.3$  Hz, 3H), 0.98 (d,  $J = 6.6$  Hz, 1.5H), 0.97 (d,  $J = 6.6$  Hz, 1.5H);  $^{13}\text{C}$  NMR (75 MHz,  $\text{CD}_2\text{Cl}_2$ )  $\delta$  198.8, 148.47, 148.42, 135.4, 135.3, 133.5, 131.2, 68.7, 68.6, 35.89, 35.87, 35.0, 30.2, 26.9, 23.6, 23.56, 20.4; IR (neat) 3431, 2966, 2925, 2870, 1672, 1625, 1453, 1364, 1255, 1140, 1059, 975  $\text{cm}^{-1}$ ; HRMS (ESI) calcd for  $\text{C}_{12}\text{H}_{20}\text{O}_2\text{Na}$   $[\text{M}+\text{Na}]^+$  219.1361, found 219.1392.

**1-((2*R*,5*S*,6*S*)-5-methyl-6-((*E*)-prop-1-en-1-yl)tetrahydro-2*H*-pyran-2-yl)propan-2-one (30)**  
The general rearrangement procedure was followed with **29** (20.0 mg, 0.102 mmol),  $\text{Re}_2\text{O}_7$  (2.5 mg, 0.005 mmol), and  $\text{CH}_2\text{Cl}_2$  (1.5 mL). The reaction was stirred at rt for 50 min and then was quenched with pyridine (25  $\mu\text{L}$ ).  $\text{Me}_2(\text{Bn})\text{SiH}$  (5  $\mu\text{L}$ ) was added as an internal standard. Crude  $^1\text{H}$  NMR was used to determine the yield of 90%.  $^1\text{H}$  NMR (400 MHz,  $\text{CH}_2\text{Cl}_2$ )  $\delta$  5.68 (ddq,  $J = 0.8, 6.4, 15.2$  Hz, 1H), 5.40 (ddq,  $J = 1.6, 7.6, 15.2$  Hz, 1H), 3.77 (dddd,  $J = 2.4, 2.4, 6.4, 10.8$  Hz, 1H), 3.35 (dd,  $J = 8.4, 8.8$  Hz, 1H), 2.74 (dd,  $J = 6.4, 15.6$  Hz, 1H), 2.47 (dd,  $J = 6.0, 15.6$  Hz, 1H), 2.17 (s, 3H), 1.78-1.84 (m, 1H), 1.70 (dd,  $J = 1.6, 6.4$  Hz, 3H), 1.64-1.69 (m, 1H), 1.20-1.37 (m, 3H), 0.78 (d,  $J = 6.4$  Hz, 3H);  $^{13}\text{C}$  NMR (100 MHz,  $\text{CH}_2\text{Cl}_2$ )  $\delta$  207.5, 130.9, 129.0, 85.1, 73.6, 50.3, 35.0, 32.3, 31.9, 31.0, 17.9, 17.8; IR (neat) 2925, 2872, 2852, 1716, 1676, 1453, 1357, 1224, 1186, 1169, 1151, 1069, 1014, 965  $\text{cm}^{-1}$ ; HRMS (APCI) calcd for  $\text{C}_{12}\text{H}_{20}\text{O}_2\text{Na}$   $[\text{M}+\text{Na}]^+$  219.1361, found 219.1383.

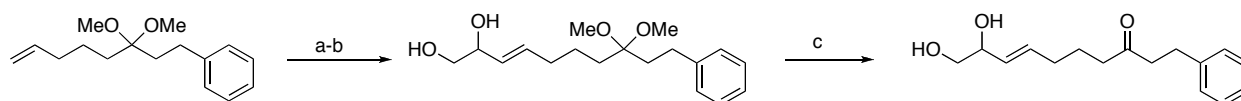

**Reagents and conditions**

a) Butenediol bis(triethylsilyl) ether, Grubbs-Hoveyda metathesis catalyst,  $\text{CH}_2\text{Cl}_2$ , reflux, 42%. b)  $\text{Bu}_4\text{NF}$ , THF, 97%. c) HOAc,  $\text{H}_2\text{O}$ , 85%.

**Scheme 11.** Synthesis of substrate **38** and **46**.

**(*E*)-8,8-Dimethoxy-10-phenyldec-3-ene-1,2-diol (38)**  
 $^1\text{H}$  NMR (500 MHz,  $\text{CD}_2\text{Cl}_2$ )  $\delta$  7.23-7.29 (m, 2H), 7.14-7.21 (m, 3H), 5.76 (ddt,  $J = 2.0, 7.0, 15.5$  Hz, 1H), 5.47 (ddt,  $J = 1.2, 6.5, 5.0$  Hz, 1H), 4.11-4.18 (m, 1H), 3.54-3.60 (m, 1H), 3.39-3.45 (m, 1H), 3.24 (s, 6H), 2.51-2.56 (m, 2H), 2.24 (br, 1H), 2.04-2.10 (q,  $J = 7.0$  Hz, 2H), 2.04-2.10 (br, 1H), 1.81-1.86 (m, 2H), 1.59-1.64 (m, 2H), 1.34-1.41 (m, 2H);  $^{13}\text{C}$  NMR (125 MHz,  $\text{CD}_2\text{Cl}_2$ )  $\delta$  142.2, 133.2, 129.4, 128.3, 128.2, 125.8, 102.8, 73.1, 66.6, 47.5, 34.2, 32.3, 31.8, 30.1, 23.2; IR (neat) 3399, 3061, 3025, 2949, 2828, 1669, 1603, 1495, 1454, 1303, 1182, 1072, 971, 742  $\text{cm}^{-1}$ ; HRMS (ESI) calcd for  $\text{C}_{18}\text{H}_{28}\text{O}_4\text{Na}$   $[\text{M}+\text{Na}]^+$  331.1885, found 331.1889.

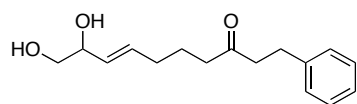

**(E)-9,10-Dihydroxy-1-phenyldec-7-en-3-one (46)**

$^1\text{H}$  NMR (400 MHz,  $\text{CD}_2\text{Cl}_2$ )  $\delta$  7.23-7.30 (m, 2H), 7.14-7.20 (m, 3H), 5.69 (ddt,  $J$  = 1.2, 6.8, 15.2 Hz, 1H), 5.43 (ddt,  $J$  = 1.4, 6.4, 15.2 Hz, 1H), 4.09-4.17 (m, 1H), 3.56 (dd,  $J$  = 2.0, 10.8 Hz, 1H), 3.41 (dd,  $J$  = 7.4, 11.2 Hz, 1H), 2.85 (t,  $J$  = 7.4 Hz, 2H), 2.85 (br, 1H), 2.71 (t,  $J$  = 7.4 Hz, 2H), 2.71 (br, 1H), 2.38 (t,  $J$  = 7.4 Hz, 2H), 2.01 (q,  $J$  = 7.4 Hz, 2H), 1.62 (p,  $J$  = 7.4 Hz, 2H);  $^{13}\text{C}$  NMR (100 MHz,  $\text{CD}_2\text{Cl}_2$ )  $\delta$  210.0, 141.4, 132.5, 129.6, 128.4, 128.3, 126.0, 73.0, 66.6, 44.1, 42.0, 31.6, 29.6, 23.0; IR (neat) 3378, 3030, 2929, 1709, 1603, 1495, 1453, 1408, 1372, 1074, 1029, 972, 748  $\text{cm}^{-1}$ ; HRMS (ESI) calcd for  $\text{C}_{16}\text{H}_{22}\text{O}_3\text{Na}$   $[\text{M}+\text{Na}]^+$  285.1467, found 285.1470.

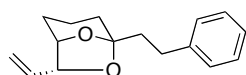

**(±)-(1R, 5S, 7S)-5-Phenethyl-7-vinyl-6,8-dioxabicyclo[3.2.1]octane (40)**

The general rearrangement procedure was followed with **38** (100 mg, 0.32 mmol),  $\text{Re}_2\text{O}_7$  (8 mg, 0.02 mmol), and  $\text{CH}_2\text{Cl}_2$  (5.0 mL). The reaction was stirred at rt for 21 h then was quenched with pyridine (25  $\mu\text{L}$ ). The crude material was purified by flash chromatography (1%-3% ethyl acetate in hexanes) to give the product (39 mg, 49%, dr = 4:3, for substrate **46**, 40%, dr = 4:3).  $^1\text{H}$  NMR (400 MHz,  $\text{CD}_2\text{Cl}_2$ )  $\delta$  7.22-7.29 (m, 2H), 7.18-7.22 (m, 2H), 7.12-7.18 (m, 1H), 6.05 (ddd,  $J$  = 6.8, 10.4, 17.2 Hz, 1H), 5.42 (dt,  $J$  = 1.6, 17.2 Hz, 1H), 5.29 (ddd,  $J$  = 1.2, 1.6, 10.4, 1H), 4.49 (ddq,  $J$  = 1.2, 4.4, 6.8, 1H), 4.30 (t,  $J$  = 4.0), 2.73-2.79 (m, 2H), 1.94-2.00 (m, 2H), 1.90-2.00 (m, 1H), 1.72-1.83 (m, 1H), 1.63-1.79 (m, 2H), 1.53-1.63 (m, 2H);  $^{13}\text{C}$  NMR (100 MHz,  $\text{CD}_2\text{Cl}_2$ )  $\delta$  142.7, 133.3, 128.34, 128.25, 125.6, 118.4, 108.7, 81.6, 77.7, 39.9, 33.4, 29.0, 24.6, 17.1; IR (neat) 3062, 2954, 2915, 1603, 1496, 1456, 1373, 1253, 1236, 1099, 1028, 988, 862, 749  $\text{cm}^{-1}$ ; HRMS (APCI) calcd for  $\text{C}_{16}\text{H}_{21}\text{O}_2$   $[\text{M}+\text{H}]^+$  245.1442, found 245.1521.

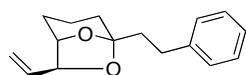

**(±)-(1R, 5S, 7R)-5-Phenethyl-7-vinyl-6,8-dioxabicyclo[3.2.1]octane (39)**

$^1\text{H}$  NMR (400 MHz,  $\text{CD}_2\text{Cl}_2$ )  $\delta$  7.23-7.28 (m, 2H), 7.13-7.21 (m, 3H), 5.88 (ddd,  $J$  = 7.2, 10.0, 17.2 Hz, 1H), 5.24 (ddd,  $J$  = 1.2, 1.6, 17.2 Hz, 1H), 5.10 (ddd,  $J$  = 0.8, 1.6, 10.0 Hz, 1H), 4.44 (dd,  $J$  = 0.4, 3.6 Hz, 1H), 4.20 (br, 1H), 2.72-2.78 (m, 2H), 1.94-2.00 (m, 2H), 1.85-1.94 (m, 1H), 1.75-1.84 (m, 1H), 1.61-1.69 (m, 3H), 1.54-1.61 (m, 1H);  $^{13}\text{C}$  NMR (100 MHz,  $\text{CD}_2\text{Cl}_2$ )  $\delta$  142.6, 139.0, 128.32, 128.27, 125.6, 115.3, 109.3, 80.8, 79.8, 39.6, 33.9, 29.4, 28.1, 17.1; IR (neat) 3062, 3026, 2925, 2871, 1728, 1607, 1496, 1457, 1374, 1343, 1278, 1234, 1179, 1111, 1085, 1032, 1004, 924, 750  $\text{cm}^{-1}$ ; HRMS (APCI) calcd for  $\text{C}_{16}\text{H}_{21}\text{O}_2$   $[\text{M}+\text{H}]^+$  245.1442, found 245.1581.

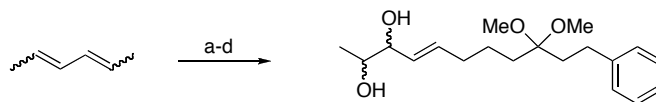

**Reagents and conditions**

a) AD-Mix  $\beta$ ,  $\text{CH}_3\text{SO}_2\text{NH}_2$ ,  $t\text{BuOH}$ ,  $\text{H}_2\text{O}$ , 0  $^\circ\text{C}$ . b) TESCl, imidazole, DMAP, DMF, 74% (two steps). c) Alkenyl ketal, Grubbs-Hoveyda metathesis catalyst,  $\text{CH}_2\text{Cl}_2$ , reflux, 27%. d)  $\text{Bu}_4\text{NF}$ , THF, 75%.

**Scheme 12.** Synthesis of **43**.

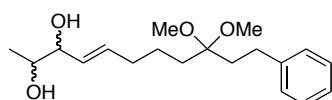

**(E)-9,9-dimethoxy-11-phenylundec-4-ene-2,3-diol (43)**

$^1\text{H}$  NMR (400 MHz,  $\text{CD}_2\text{Cl}_2$ )  $\delta$  7.25-7.30 (m, 2H), 7.15-7.21 (m, 3H), 5.75 (ddt,  $J$  = 0.8, 6.8, 15.2 Hz, 1H), 5.46 (ddt,  $J$  = 1.4, 7.2, 15.2 Hz, 1H), 3.74 (t,  $J$  = 6.8 Hz, 1H), 3.60 (t,  $J$  = 6.4 Hz, 1H), 3.15 (s, 6H), 2.51-2.56 (m, 2H), 2.08 (q,  $J$  = 6.8 Hz, 2H), 1.82-1.88 (m, 2H), 1.60-1.65 (m, 2H), 1.35-1.43 (m, 2H), 1.12 (d,  $J$  = 6.0 Hz, 3H);  $^{13}\text{C}$  NMR (100 MHz,  $\text{CD}_2\text{Cl}_2$ )  $\delta$  142.2, 133.9, 130.0, 128.4, 128.2, 125.8, 102.9, 77.8, 70.8, 47.5, 34.2, 32.4, 31.9, 30.1, 23.2, 18.8; IR (neat) 3411, 3061, 3025, 2951, 2829, 1669, 1603, 1495, 1454, 1368, 1266, 1181, 1055, 972, 742  $\text{cm}^{-1}$ ; HRMS (EI) calcd for  $\text{C}_{19}\text{H}_{30}\text{O}_4\text{Na}$   $[\text{M}+\text{Na}]^+$  345.2042, found 345.2051.

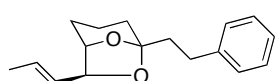

**(1R, 5S, 7R)-5-Phenethyl-7-((E)-prop-1-en-1-yl)-6,8-dioxabicyclo[3.2.1]octane (44)**

The general cyclization procedure was followed with **43** (50 mg, 0.16 mmol),  $\text{Re}_2\text{O}_7$  (4 mg, 0.008 mmol), and  $\text{CH}_2\text{Cl}_2$  (5.0 mL). The reaction was stirred at rt for 15 h and then was quenched with pyridine (25  $\mu\text{L}$ ). The crude mixture was purified by flash chromatography (1%-3% ethyl acetate in hexanes) to give the product (21 mg, 53%, dr = 7.5 : 1).  $^1\text{H}$  NMR (400 MHz,  $\text{CD}_2\text{Cl}_2$ )  $\delta$  7.23-7.29 (m, 2H), 7.18-7.22 (m, 2H), 7.12-7.18 (m, 1H), 5.67 (ddt,  $J$  = 0.4, 6.4, 15.2 Hz, 1H), 5.52 (ddt,  $J$  = 1.4, 8.0, 15.2 Hz, 1H), 4.40 (d,  $J$  = 8.0 Hz, 1H), 2.72-2.78 (m, 2H), 1.91-1.98 (m, 2H), 1.83-1.91 (m, 1H), 1.73-1.81 (m, 1H), 1.69 (dd,  $J$  = 1.6, 6.4 Hz, 3H), 1.59-1.66 (m, 3H), 1.52-1.58 (m, 1H);  $^{13}\text{C}$  NMR (100 MHz,  $\text{CD}_2\text{Cl}_2$ )  $\delta$  142.7, 132.1, 128.33, 128.25, 127.3, 125.6, 108.9, 80.7, 79.9, 39.6, 34.0, 29.4, 28.1, 17.3, 17.1; IR (neat) 3061, 3026, 2950, 1671, 1603, 1496, 1453, 1373, 1344, 1175, 1067, 1024, 990, 906, 751  $\text{cm}^{-1}$ ; HRMS (APCI) calcd for  $\text{C}_{17}\text{H}_{23}\text{O}_2$   $[\text{M}+\text{H}]^+$  259.1698, found 259.1673.

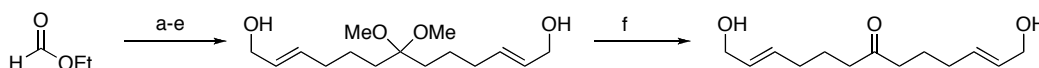

**Reagents and conditions**

a) Pentenylmagnesium bromide, THF, 0  $^\circ\text{C}$ , 82%. b) PCC, Celite,  $\text{CH}_2\text{Cl}_2$ , 81%. c)  $(\text{MeO})_3\text{CH}$ ,  $p$ -TsOH, MeOH, 50  $^\circ\text{C}$ , 92%. d) Methyl acrylate, Grubbs-Hoveyda metathesis catalyst,  $\text{CH}_2\text{Cl}_2$ , reflux, 68%. e) DIBAL-H,  $\text{CH}_2\text{Cl}_2$ , -78  $^\circ\text{C}$ , 77%. f) HOAc,  $\text{H}_2\text{O}$ , 84%.

**Scheme 13.** Synthesis of substrates **47** and **50**.

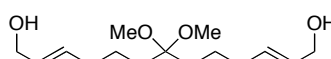

**(2E,11E)-7,7-dimethoxytrideca-2,11-diene-1,13-diol (47)**

$^1\text{H}$  NMR (400 MHz,  $\text{C}_6\text{D}_6$ )  $\delta$  5.53-5.75 (m, 4H), 4.06 (br, 4H), 3.22-3.38 (br, 2H), 3.07 (s, 6H), 2.00 (q,  $J$  = 3.2 Hz, 4H), 1.65-1.71 (m, 4H), 1.42 (p,  $J$  = 7.6 Hz, 4H);  $^{13}\text{C}$  NMR (100 MHz,  $\text{C}_6\text{D}_6$ )  $\delta$  131.2, 130.3, 103.3, 62.9, 47.2, 32.3, 32.1, 23.5; IR (neat) 3384, 2946, 1710, 1670, 1457, 1369, 1314, 1180, 1088, 970  $\text{cm}^{-1}$ ; HRMS (ESI) calcd for  $\text{C}_{15}\text{H}_{28}\text{O}_4\text{Na}$   $[\text{M}+\text{Na}]^+$  295.1885, found 295.1860.

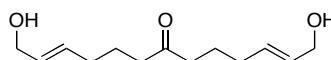

**(2E,11E)-1,13-dihydroxytrideca-2,11-dien-7-one (50)**

$^1\text{H}$  NMR (400 MHz,  $\text{CD}_2\text{Cl}_2$ )  $\delta$  5.60-5.70 (m, 4H), 4.06 (br, 4H), 2.42 (t,  $J$  = 7.2 Hz, 4H), 2.25-2.35 (br, 2H), 2.02-2.09 (m, 4H), 1.66 (p,  $J$  = 7.2 Hz, 4H);  $^{13}\text{C}$  NMR (100 MHz,  $\text{CD}_2\text{Cl}_2$ )  $\delta$  211.0, 131.5, 130.1, 63.2, 41.8, 31.5, 23.1; IR (neat) 3250, 3052, 3011, 2933, 2865, 1698, 1457, 1415, 1371, 1266, 1088, 1016, 970  $\text{cm}^{-1}$ ; HRMS (EI) calcd for  $\text{C}_{13}\text{H}_{22}\text{O}_3\text{Na}$   $[\text{M}+\text{Na}]^+$  249.1467, found 249.1451.

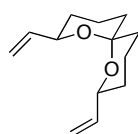

**(±)-(2R, 6R, 8R)-2,8-Divinyl-1,7-dioxaspiro[5.5]undecane (48)**

The general rearrangement procedure was followed with **47** (14 mg, 0.051 mmol),  $\text{Re}_2\text{O}_7$  (1.2 mg, 0.0025 mmol), and  $\text{CD}_2\text{Cl}_2$  (1.0 mL). The reaction was stirred at rt for 30 min.  $\text{BnMe}_2\text{SiH}$  (5  $\mu\text{L}$ ) was added as an internal standard, and a  $^1\text{H}$  NMR spectrum was taken of the crude mixture to show an 88% yield and 1:1 ratio of two stereoisomers. Additional stirring (>12 h) resulted in the mixture giving essentially a single diastereomer (dr > 20:1) with a decrease in overall yield (60%). The general rearrangement cyclization procedure was also followed with **50** (50 mg, 0.221 mmol),  $\text{Re}_2\text{O}_7$  (5.4 mg, 0.011 mmol), and  $\text{CD}_2\text{Cl}_2$  (3.0 mL). The reaction was stirred at rt for 30 min.  $\text{BnMe}_2\text{SiH}$  (5  $\mu\text{L}$ ) was added as an internal standard, and a  $^1\text{H}$  NMR spectrum was taken of the crude mixture to show a 94% yield and 1:1 ratio of two stereoisomers. Additional stirring (48 h) with the addition of MeOH showed isomerization of the mixture to give essentially a single stereoisomer with a decrease in overall yield (61%).  $^1\text{H}$  NMR (400 MHz,  $\text{C}_6\text{D}_6$ )  $\delta$  5.89 (ddd,  $J$  = 5.2, 10.4, 17.2 Hz, 2H), 5.30 (dt,  $J$  = 1.6, 17.2 Hz, 2H), 5.02 (dt,  $J$  = 1.6, 10.4 Hz, 2H), 4.17 (dddd,  $J$  = 1.2, 1.6, 2.4, 5.6, 11.2 Hz, 2H), 2.03 (dq,  $J$  = 4.0, 13.2 Hz, 2H), 1.63 (dddd,  $J$  = 1.6, 2.4, 4.0, 13.2 Hz, 2H), 1.41-1.49 (m, 2H), 1.34-1.41 (m, 2H), 1.17-1.34 (m, 4H);  $^{13}\text{C}$  NMR (100 MHz,  $\text{C}_6\text{D}_6$ )  $\delta$  140.0, 113.2, 95.9, 69.7, 35.2, 31.1, 18.8; IR 3012, 2927, 2854, 1646, 456, 1374, 1279, 1220, 981, 917 (neat)  $\text{cm}^{-1}$ ; HRMS (APCI) calcd for  $\text{C}_{13}\text{H}_{21}\text{O}_2$   $[\text{M}+\text{H}]^+$  209.1542, found 209.1567.

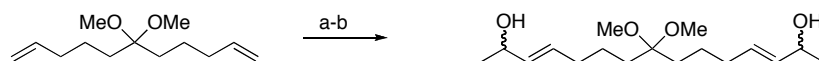

**Reagents and conditions**

a) Methyl vinyl ketone, Grubbs-Hoveyda metathesis catalyst,  $\text{CH}_2\text{Cl}_2$ , reflux, 44%. b) DIBAL-H,  $\text{CH}_2\text{Cl}_2$ ,  $-78^\circ\text{C}$ , 81%.

**Scheme 14.** Synthesis of substrate **51**.

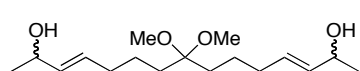

**(3E, 12E)-8,8-dimethoxy-pentadeca-3,12-diene-2,14-diol (51)**

$^1\text{H}$  NMR (400 MHz,  $\text{C}_6\text{D}_6$ )  $\delta$  5.52-5.62 (m, 4H), 4.21 (p,  $J = 5.2$  Hz, 2H), 3.07 (s, 6H), 2.89 (br, 2H), 1.94-2.0 (m, 4H), 1.65-1.70 (m, 4H), 1.37-1.45 (m, 4H), 1.25 (d,  $J = 6.4$  Hz, 6H);  $^{13}\text{C}$  NMR (100 MHz,  $\text{C}_6\text{D}_6$ )  $\delta$  135.5, 129.1, 103.2, 68.1, 47.1, 32.1, 32.0, 23.6, 23.5; IR (neat) 3388, 2950, 1711, 1670, 1455, 1368, 1294, 1181, 1060, 969, 941, 864  $\text{cm}^{-1}$ ; HRMS (APCI) calcd for  $\text{C}_{17}\text{H}_{32}\text{O}_4\text{Na}$   $[\text{M}+\text{Na}]^+$  323.2198, found 323.2199.

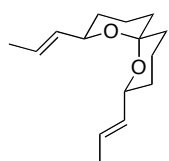

**(±)-(2R, 6R, 8R)-2,8-Di((E)-prop-1-en-1-yl)-1,7-dioxaspiro[5.5]undecane (52)**

The general rearrangement procedure was followed with **51** (44 mg, 0.15 mmol),  $\text{Re}_2\text{O}_7$  (4 mg, 0.007 mmol), and  $\text{CD}_2\text{Cl}_2$  (3.0 mL). The reaction was stirred at  $0^\circ\text{C}$  for 60 min.  $\text{BnMe}_2\text{SiH}$  (5  $\mu\text{l}$ ) was added as an internal standard, and a  $^1\text{H}$  NMR spectrum was taken of the crude mixture to show a 54% yield.  $^1\text{H}$  NMR (400 MHz,  $\text{CDCl}_3$ )  $\delta$  5.70 (ddq,  $J = 1.2, 6.4, 15.2$  Hz, 2H), 5.52 (ddq,  $J = 1.6, 6.4, 15.2$  Hz, 2H), 4.04 (ddp,  $J = 1.2, 6.4, 11.6$  Hz, 2H), 1.94 (tq,  $J = 4.0, 13.2$  Hz, 2H), 1.71 (dd,  $J = 1.6, 6.4$  Hz, 6H), 1.52-1.67 (m, 6H), 1.36-1.45 (m, 2H), 1.25-1.36 (m, 2H);  $^{13}\text{C}$  NMR (100 MHz,  $\text{CDCl}_3$ )  $\delta$  132.7, 126.4, 96.4, 69.6, 35.1, 31.0, 18.8, 17.9; IR 2937, 2867, 1731, 1676, 1452, 1438, 1377, 1279, 1219, 1201, 1036, 979, 964 (neat)  $\text{cm}^{-1}$ ; HRMS (APCI) calcd for  $\text{C}_{15}\text{H}_{25}\text{O}_2$   $[\text{M}+\text{H}]^+$  237.1855, found 237.1837.

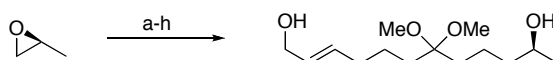

**Reagents and conditions**

a) Butenylmagnesium bromide,  $\text{CuCN}$ ,  $\text{Et}_2\text{O}$ ,  $0^\circ\text{C}$ , 30%. b)  $\text{Me}_3\text{CC}(\text{O})\text{Cl}$ ,  $\text{Et}_3\text{N}$ , DMAP,  $\text{CH}_2\text{Cl}_2$ . c)  $\text{O}_3$ ,  $\text{CH}_2\text{Cl}_2$ ,  $-78^\circ\text{C}$ , then  $\text{Me}_2\text{S}$ , 27% (two steps). d) Pentenylmagnesium bromide,  $\text{Et}_2\text{O}$ ,  $0^\circ\text{C}$ , 56%. e) PCC, Celite,  $\text{CH}_2\text{Cl}_2$ , 86%. f)  $(\text{MeO})_3\text{CH}$ ,  $p\text{-TsOH}$ ,  $\text{MeOH}$ , 100%. g) Methyl acrylate, Grubbs-Hoveyda second generation metathesis catalyst,  $\text{CH}_2\text{Cl}_2$ , reflux, 96%. h) DIBAL-H,  $\text{CH}_2\text{Cl}_2$ ,  $-78^\circ\text{C}$ , 66%.

**Scheme 15.** Synthesis of substrate **53**.

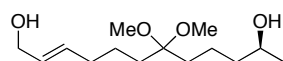

**(S, E)-7,7-dimethoxydodec-2-ene-1,11-diol (53)**

$^1\text{H}$  NMR (400 MHz,  $\text{C}_6\text{D}_6$ )  $\delta$  5.58-5.71 (m, 2H), 4.04 (br, 2H), 3.63-3.70 (m, 1H), 3.09 (s, 3H), 3.08 (s, 3H), 1.95-2.05 (m, 2H), 1.62-1.76 (m, 4H), 1.28-1.60 (m, 6H), 1.12 (d,  $J = 6.0$ , 3H);  $^{13}\text{C}$  NMR (100 MHz,  $\text{C}_6\text{D}_6$ )  $\delta$  131.1, 130.5, 103.4, 67.2, 62.9, 47.2, 39.4, 32.6, 32.1, 31.8, 23.6, 23.4, 20.1; IR (neat) 3396, 2949, 2871, 1669, 1458, 1372, 1131, 1041, 971  $\text{cm}^{-1}$ ; HRMS (ESI) calcd for  $\text{C}_{14}\text{H}_{28}\text{O}_4\text{Na}$   $[\text{M}+\text{Na}]^+$  283.1885, found 283.1915;  $[\alpha]_D = +6.26$  (c 0.91,  $\text{CHCl}_3$ ); ee > 99% as determined by Mosher ester analysis.

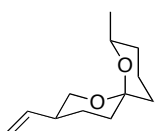

**(2S, 6R, 8R)-2-methyl-8-vinyl-1,7-dioxaspiro[5.5]undecane (55)**

The general rearrangement procedure was followed with **53** (50 mg, 0.19 mmol) and  $\text{Re}_2\text{O}_7$  (5 mg, 0.01 mmol) in  $\text{CD}_2\text{Cl}_2$  (3.0 mL), the reaction was stirred at rt for 24 h.  $\text{BnMe}_2\text{SiH}$  (5  $\mu\text{l}$ ) was added as an internal standard, and a  $^1\text{H}$  NMR spectrum was taken of the crude mixture to show a 61% yield.  $^1\text{H}$  NMR (400 MHz,  $\text{CDCl}_3$ )  $\delta$  5.88 (ddd,  $J = 5.2, 10.4, 17.2$  Hz, 1H), 5.26 (dt,  $J = 1.6, 17.2$  Hz, 1H), 5.09 (dt,  $J = 1.6, 10.4$  Hz, 1H), 4.08 (dddd,  $J = 1.2, 1.6, 2.4, 5.2, 10.4$  Hz, 1H), 3.72 (dddd,  $J = 2.0, 6.0, 6.0, 6.0, 8.0$  Hz, 1H), 1.86-2.02 (m, 2H), 1.49-1.70 (m, 6H), 1.35-1.46 (m, 2H), 1.18-1.35 (m, 2H), 1.15 (d,  $J = 6.4$ , 3H);  $^{13}\text{C}$  NMR (100 MHz,  $\text{CDCl}_3$ )  $\delta$  139.8, 114.0, 96.3, 69.5, 65.2, 35.2, 35.1, 32.7, 30.8, 21.9, 18.9, 18.8; IR (neat) 2924, 2853, 1658, 1459, 1377, 1224, 1087, 992  $\text{cm}^{-1}$ ; HRMS (ESI) calcd for  $\text{C}_{12}\text{H}_{20}\text{O}_2\text{Na}$   $[\text{M}+\text{Na}]^+$  219.1361, found 219.1387.

$[\alpha]_D = -43.2$  (c 0.31,  $\text{CHCl}_3$ ); ee: 96% as determined by HPLC analysis using a Phenomenex Lux  $5\mu$  Cellulose-3 column (250 x 4.60 mm) with MeOH/ $\text{H}_2\text{O}$  (60/40, v/v) as the mobile phase.

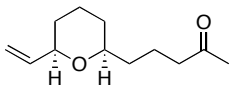 **5-((2S, 6R)-6-vinyltetrahydro-2H-pyran-2-yl)pentan-2-one (57)**  
 $^1\text{H}$  NMR (400 MHz,  $\text{CD}_2\text{Cl}_2$ )  $\delta$  5.82 (ddd,  $J = 5.2, 10.4, 17.2$  Hz, 1H), 5.18 (dt,  $J = 1.6, 17.2$  Hz, 1H), 5.02 (dt,  $J = 1.6, 10.4$  Hz, 1H), 3.77 (ddddd,  $J = 1.2, 1.6, 2.4, 5.2, 10.8$  Hz, 1H), 3.30 (ddddd,  $J = 2.0, 5.2, 7.6, 10.8$  Hz, 1H), 2.41 (t,  $J = 7.2$  Hz, 2H), 2.08 (s, 3H), 1.78-1.85 (m, 2H), 1.35-1.70 (m, 6H), 1.08-1.27 (m, 4H);  $^{13}\text{C}$  NMR (100 MHz,  $\text{CD}_2\text{Cl}_2$ )  $\delta$  208.7, 140.0, 113.5, 78.0, 77.3, 43.5, 35.8, 31.6, 31.3, 29.6, 23.5, 20.0; IR 3080, 2933, 2857, 1715, 1647, 1440, 1410, 1364, 1201, 1167, 1090, 1046, 990, 919 (neat)  $\text{cm}^{-1}$ ; HRMS (APCI) calcd for  $\text{C}_{12}\text{H}_{21}\text{O}_2$   $[\text{M}+\text{H}]^+$  197.1542, found 197.1566.

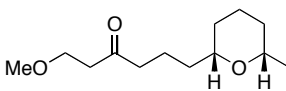 **1-methoxy-6-((2S,6S)-6-methyltetrahydro-2H-pyran-2-yl)hexan-3-one (58)**  
 $^1\text{H}$  NMR (400 MHz,  $\text{CD}_2\text{Cl}_2$ )  $\delta$  3.58 (t,  $J = 6.4$ , 2H), 3.36 (ddddd,  $J = 2.0, 6.0, 6.0, 6.0, 11.2$ , 1H), 3.22 (ddddd,  $J = 2.0, 5.2, 7.2, 10.8$ , 1H), 1.72-1.81 (m, 1H), 1.58-1.78 (m, 1H), 1.47-1.58 (m, 4H), 1.27-1.47 (m, 3H), 1.09 (d,  $J = 6.4$ , 3H), 1.05-1.15 (m, 1H).  $^{13}\text{C}$  NMR (100 MHz,  $\text{CD}_2\text{Cl}_2$ )  $\delta$  209.0, 77.3, 73.6, 67.6, 58.5, 43.1, 42.7, 35.9, 33.4, 31.3, 23.7, 22.0, 19.8. IR (neat) 2967, 2930, 2860, 1714, 1452, 1387, 1373, 1322, 1202, 1118, 1083, 1041, 963  $\text{cm}^{-1}$ ; HRMS (ESI) calcd for  $\text{C}_{13}\text{H}_{24}\text{O}_3\text{Na}$   $[\text{M}+\text{Na}]^+$  251.1623, found 251.1637.

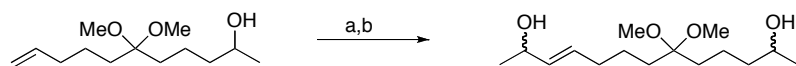

**Reagents and conditions**

a) Methyl vinyl ketone, Grubbs-Hoveyda metathesis catalyst,  $\text{CH}_2\text{Cl}_2$ , reflux, 53%. b) DIBAL-H,  $\text{CH}_2\text{Cl}_2$ ,  $-78^\circ\text{C}$ , 61%.

**Scheme 16.** Synthesis of substrate **54**.

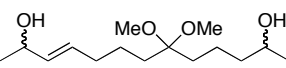 **(E)-8,8-dimethoxytridec-3-ene-2,12-diol (54)**  
 $^1\text{H}$  NMR (400 MHz,  $\text{C}_6\text{D}_6$ )  $\delta$  5.48-5.64 (m, 2H), 4.20 (p,  $J = 6.0$  Hz, 2H), 3.65 (q,  $J = 5.2$  Hz, 1H), 3.091 (s, 3H), 3.087 (s, 3H), 2.79 (d,  $J = 14.8$  Hz, 1H), 2.52 (d,  $J = 15.6$  Hz, 1H), 1.95-2.02 (q,  $J = 7.2$  Hz, 2H), 1.66-1.77 (m, 3H), 1.27-1.59 (m, 6H), 1.24 (d,  $J = 6.4$  Hz, 3H), 1.10 (d,  $J = 6.4$  Hz, 3H);  $^{13}\text{C}$  NMR (100 MHz,  $\text{C}_6\text{D}_6$ )  $\delta$  135.73, 135.68, 129.1, 103.3, 68.12, 68.09, 67.16, 67.10, 47.1, 39.4, 32.61, 32.59, 32.0, 31.8, 31.7, 23.7, 23.53, 23.48, 23.44, 20.12, 20.08. IR (neat) 3391, 2952, 2830, 1170, 1670, 1457, 1370, 1313, 1126, 1064, 969, 941  $\text{cm}^{-1}$ ; HRMS (ESI) calcd for  $\text{C}_{15}\text{H}_{30}\text{O}_4\text{Na}$   $[\text{M}+\text{Na}]^+$  297.2042, found 297.2065.

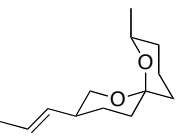 **(2S, 6R, 8R)-2-methyl-8-((E)-prop-1-en-1-yl)-1,7-dioxaspiro[5.5]undecane (56)**  
The general cyclization procedure was followed with **54** (50 mg, 0.18 mmol) and  $\text{Re}_2\text{O}_7$  (4 mg, 0.009 mmol) in  $\text{CDCl}_3$  (3.0 mL). The mixture was stirred at rt for 30 min after which the reaction was quenched with pyridine (25  $\mu\text{L}$ ).  $\text{BnMe}_2\text{SiH}$  (5  $\mu\text{L}$ ) was added as an internal standard, and a  $^1\text{H}$  NMR spectrum was taken of the crude mixture to show a 65% yield.  $^1\text{H}$  NMR (400 MHz,  $\text{CD}_2\text{Cl}_2$ )  $\delta$  5.69 (ddq,  $J = 1.2, 6.4, 15.2$  Hz, 1H), 5.51 (ddq,  $J = 1.6, 6.0, 15.2$  Hz, 1H), 4.02 (ddp,  $J = 1.2, 6.0, 11.6$  Hz, 1H), 3.72 (ddq,  $J = 2.0, 6.4, 11.2$  Hz, 1H), 1.85-1.99 (m, 2H), 1.71 (dd,  $J = 2.4, 6.4$ , 3H), 1.49-1.66 (m, 6H), 1.41 (ddd,  $J = 4.4, 8.4, 13.2$ , 2H), 1.28-1.36 (m, 1H), 1.18-1.28 (m, 1H), 1.15 (d,  $J = 6.4$  Hz, 3H);  $^{13}\text{C}$  NMR (100 MHz,  $\text{CDCl}_3$ )  $\delta$  132.8, 126.2, 96.3, 69.5, 65.1, 35.21, 35.16, 32.8, 31.0, 21.9, 18.9, 18.8, 17.9; IR (neat) 2936, 2869, 1676, 1440, 1383, 1280, 1224, 1204, 1087, 991, 964  $\text{cm}^{-1}$ ; HRMS (APCI) calcd for  $\text{C}_{13}\text{H}_{23}\text{O}_2$   $[\text{M}+\text{H}]^+$  211.1698, found 211.1716.



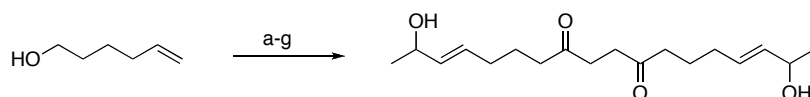

**Reagents and conditions**

a) PCC, Celite, CH<sub>2</sub>Cl<sub>2</sub>. b) MeMgBr, THF, 0 °C, 58% (two steps). c) PCC, Celite, CH<sub>2</sub>Cl<sub>2</sub>. d) (Z)-Hex-3-ene-2,5-diol, Grubbs-Hoveyda 2nd generation metathesis catalyst, CH<sub>2</sub>Cl<sub>2</sub>. e) TBDMSCl, imidazole, DMAP, DMF, 50% (three steps). f) LDA, THF, 0 °C, then CuCl<sub>2</sub>, 26%. g) Bu<sub>4</sub>NF, THF.

**Scheme 17.** Synthesis of substrate **61**.

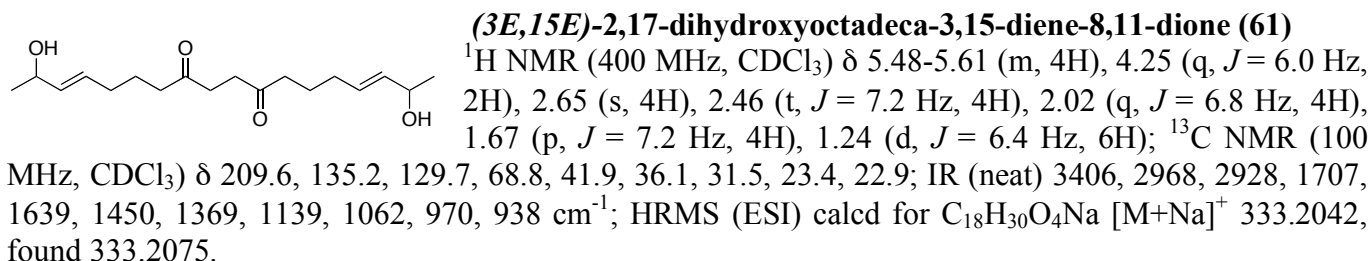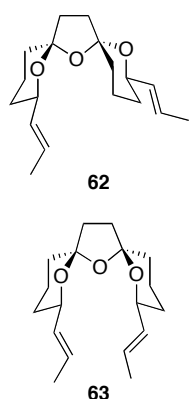

**Spirotricycles 62 and 63**

The general rearrangement procedure was followed with **61** (110 mg, 0.354 mmol), Re<sub>2</sub>O<sub>7</sub> (8.6 mg, 0.018 mmol), and CH<sub>2</sub>Cl<sub>2</sub> (3.0 mL). The reaction was stirred at 0 °C for 2 h and then was quenched with pyridine (25 μL). After evaporation of the solvent, the crude mixture was purified by flash chromatography (1%-3% ethyl acetate in hexanes) to give the product (87 mg, 84%, dr = 1:1, **62**: 43 mg, **63**: 44 mg).

Faster eluting major isomer **62**: <sup>1</sup>H NMR (400 MHz, CD<sub>2</sub>Cl<sub>2</sub>) δ 5.60 (ddq, *J* = 0.8, 6.4, 15.2 Hz, 2H), 5.40 (ddq, *J* = 1.6, 6.8, 15.2 Hz, 2H), 4.21 (dd, *J* = 7.2, 11.2 Hz, 2H), 1.85-1.98 (m, 4H), 1.79-1.83 (m, 2H), 1.65 (d, *J* = 6.4 Hz, 6H), 1.54-1.70 (m, 8H), 1.20-1.31 (m, 2H); <sup>13</sup>C NMR (100 MHz, CD<sub>2</sub>Cl<sub>2</sub>) δ 133.0, 125.8, 106.8, 71.4, 36.7, 34.8, 31.2, 20.3, 17.5; IR (neat) 3023, 2981, 2937, 2864, 1731, 1676, 1452, 1439, 1375, 1314, 1266, 1231, 1072, 1028, 968, 874 cm<sup>-1</sup>; HRMS (ESI) calcd for C<sub>18</sub>H<sub>28</sub>O<sub>3</sub>Na [M+Na]<sup>+</sup> 315.1936, found 315.1919.

The stereochemical arrangement was established by HPLC analysis using a Phenomenex Lux 5μ Cellulose-3 column (250 x 4.60 mm) with MeOH/H<sub>2</sub>O (Black line: 60/40 or Purple Line: 70/30, v/v) as the mobile phase.

Slower eluting minor isomer **63**: <sup>1</sup>H NMR (400 MHz, CD<sub>2</sub>Cl<sub>2</sub>) δ 5.58 (ddq, *J* = 0.8, 6.4, 15.6 Hz, 2H), 5.41 (ddq, *J* = 1.6, 6.8, 15.6 Hz, 2H), 4.28 (dd, *J* = 7.2, 10.8 Hz, 2H), 2.01-2.07 (m, 2H), 1.81-1.91 (m, 2H), 1.73-1.79 (m, 2H), 1.65 (d, *J* = 6.4 Hz, 6H), 1.48-1.63 (m, 8H), 1.22-1.33 (m, 2H); <sup>13</sup>C NMR (100 MHz, CD<sub>2</sub>Cl<sub>2</sub>) δ 133.0, 126.2, 107.2, 72.6, 37.4, 34.8, 31.1, 20.1, 17.5; IR (neat) 3022, 2936, 2864, 1676, 1453, 1439, 1377, 1301, 1233, 1165, 1073, 1028, 964, 866 cm<sup>-1</sup>; HRMS (ESI) calcd for C<sub>18</sub>H<sub>28</sub>O<sub>3</sub>Na [M+Na]<sup>+</sup> 315.1936, found 315.1918.

The two stereoisomers were resubjected to the following isomerization condition: 7.2 mg Re<sub>2</sub>O<sub>7</sub> (0.015 mmol) and 1.5 ml CD<sub>2</sub>Cl<sub>2</sub>. After stirring at 0 °C for 4 h, the isomerizations were quenched with pyridine (25 μL). BnMe<sub>2</sub>SiH (5 μl) was added as an internal standard to each isomerization mixture, and a <sup>1</sup>H NMR spectrum was taken of the crude mixture to show that the equilibration of **62** provided 51% of **60** and 27% of **63**. The equilibration of **61** provided 52% of **62** and 29 % of **63**. Thus, after one cycle of isomerization: a total yield of 64% could be obtained for **62** and a total yield of 54% could be obtained for **63**.

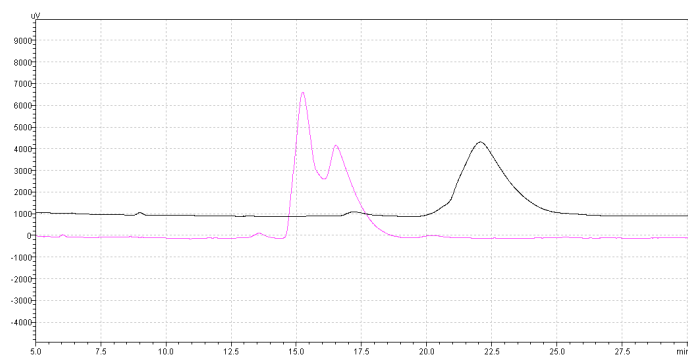

**Figure 1.** HPLC traces of **62** (pink) and **63** (black) using a chiral stationary phase.

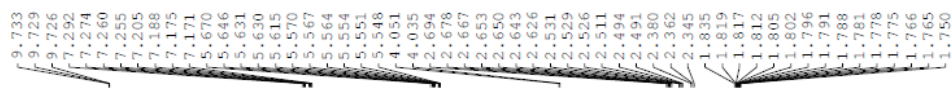

400B 1H CD2Cl2 Deprotection 040511  
PROTON CD2Cl2 C:\Bruker\TOPSPIN floreancig 8

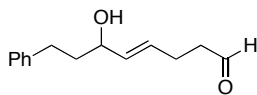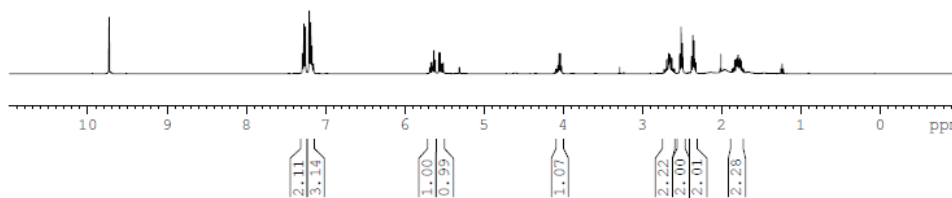

400B 13C CD2Cl2 Deprotection 040511  
C13CPD CD2Cl2 C:\Bruker\TOPSPIN floreancig 13

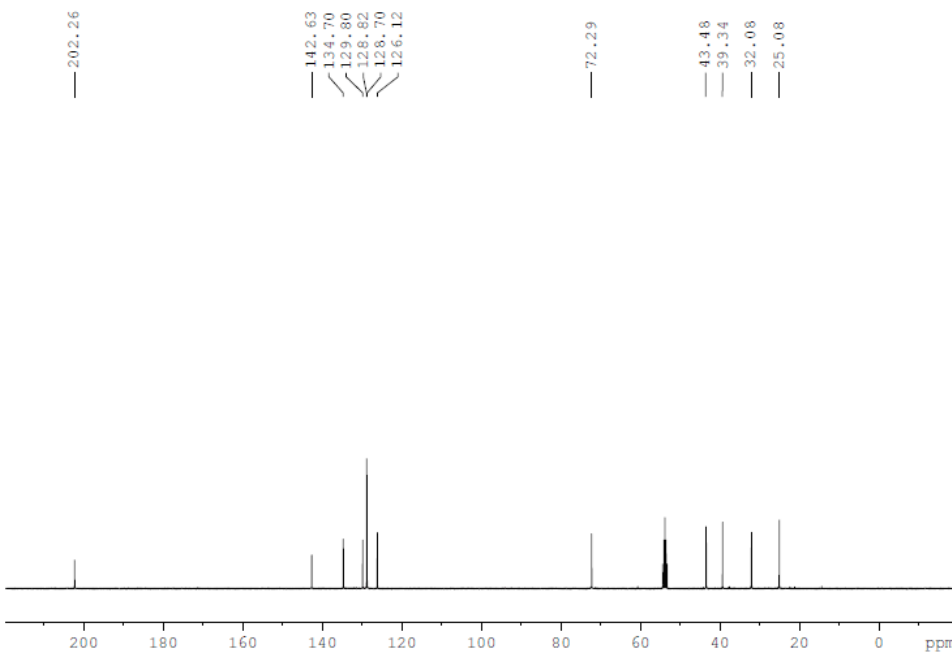







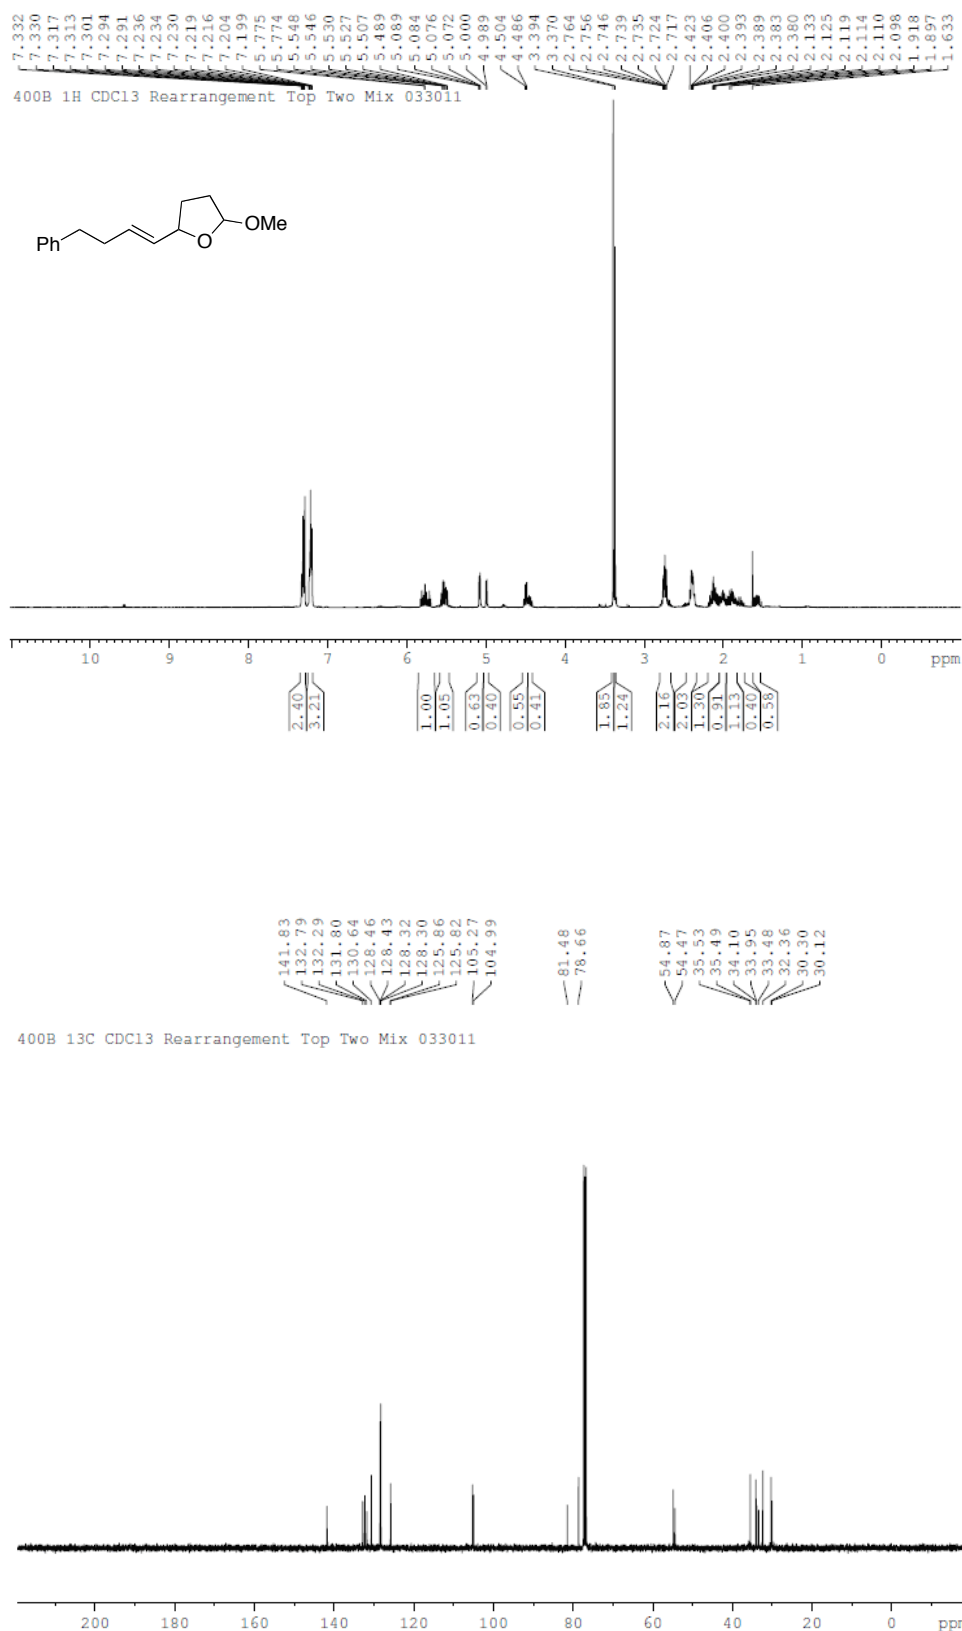

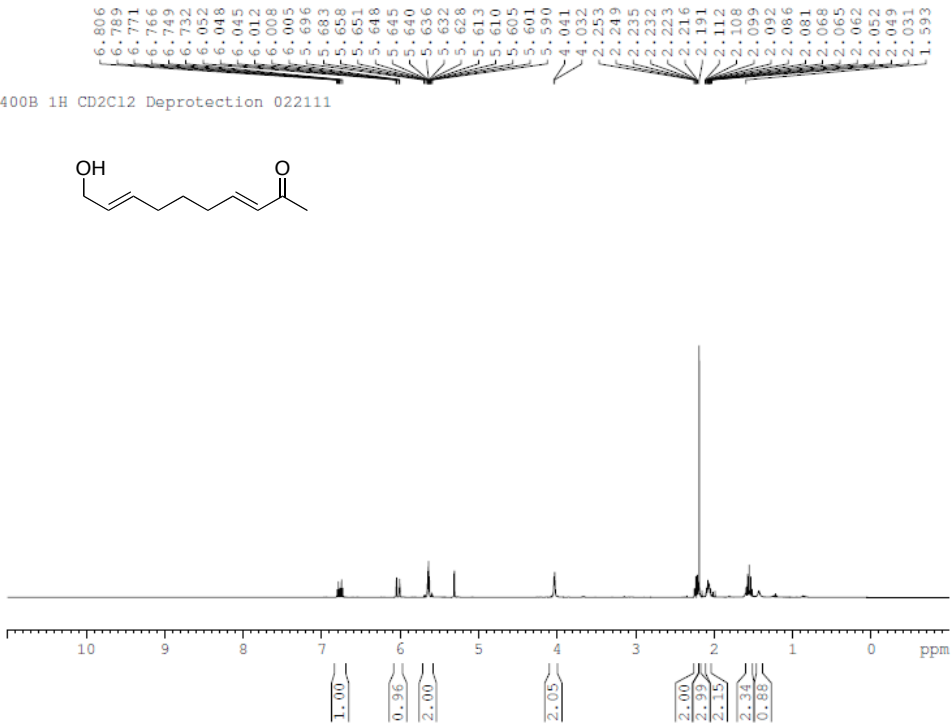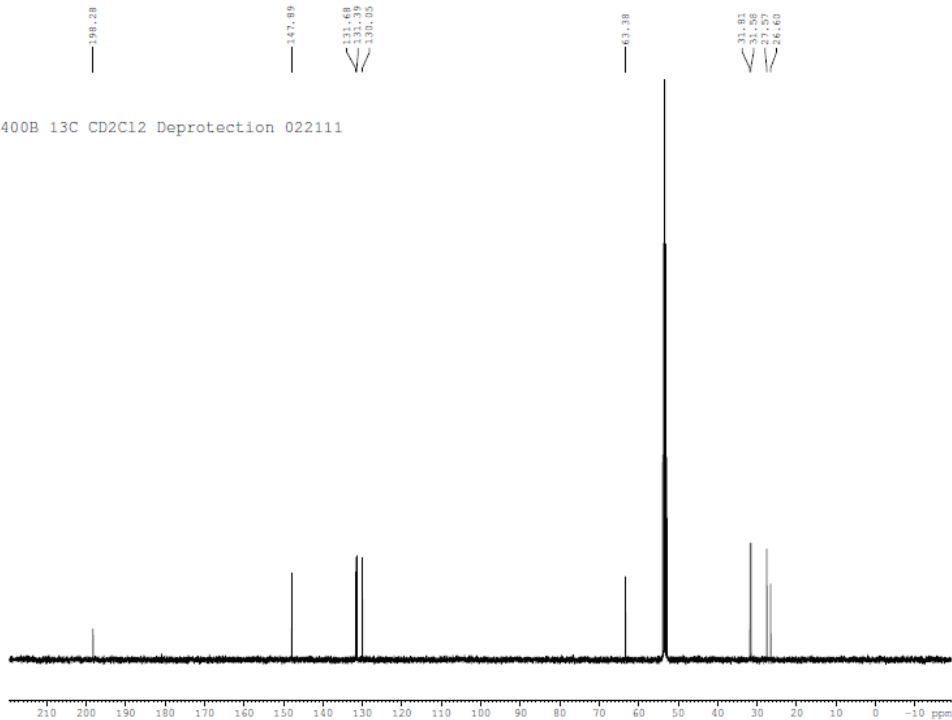

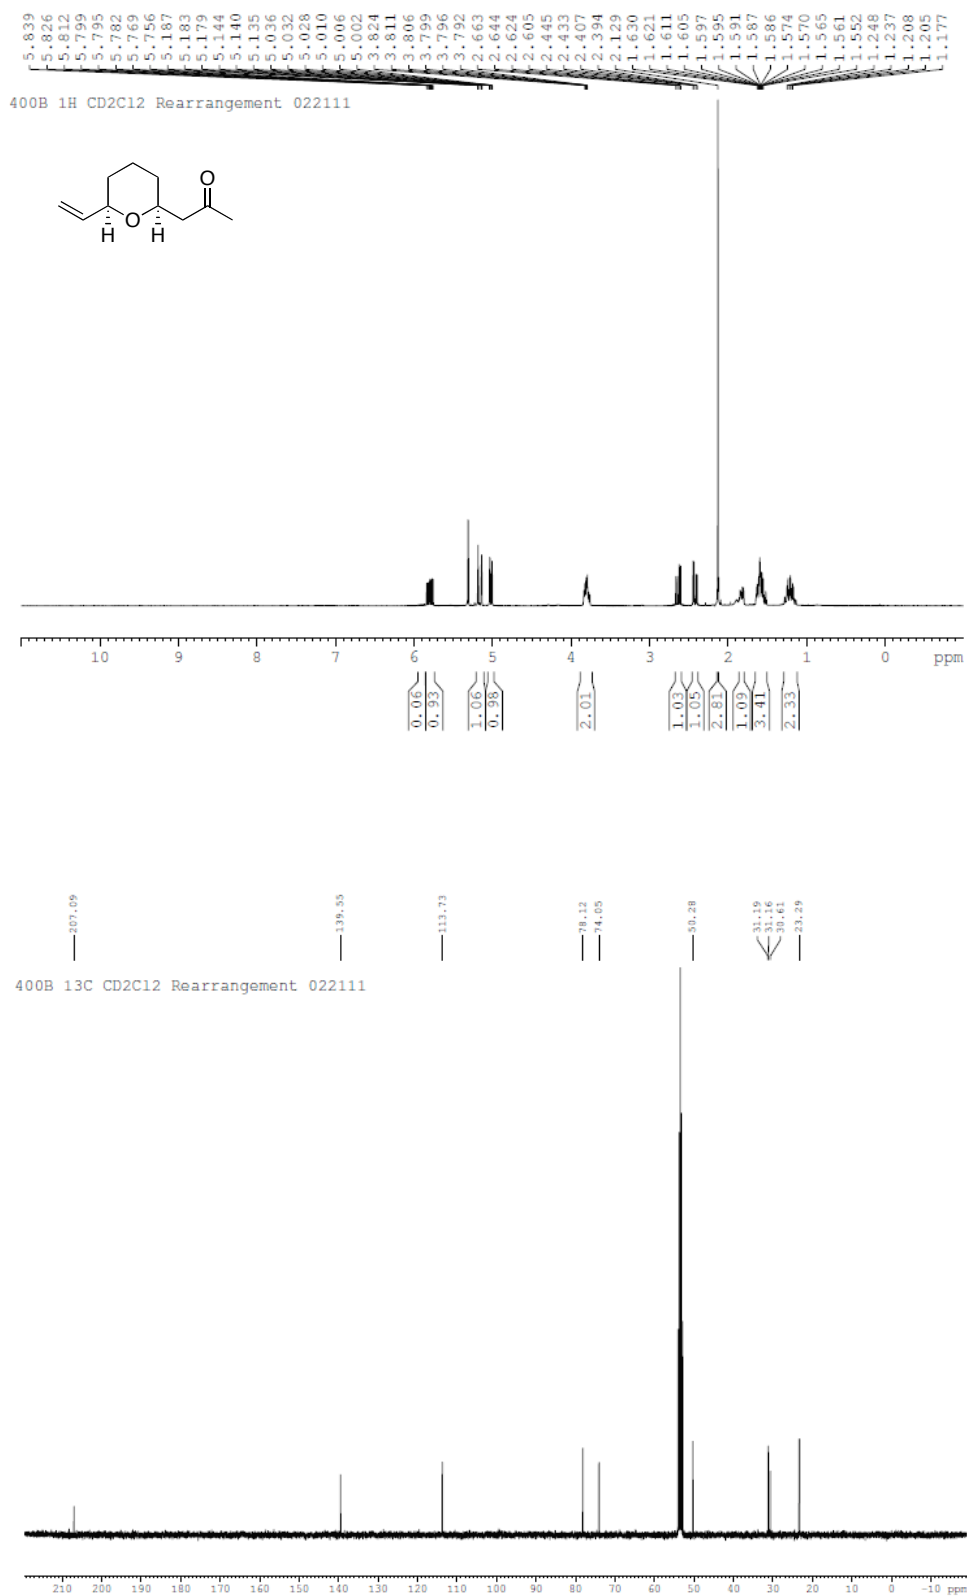

400B 1H COSY CD2Cl2 Rearrangement 022111

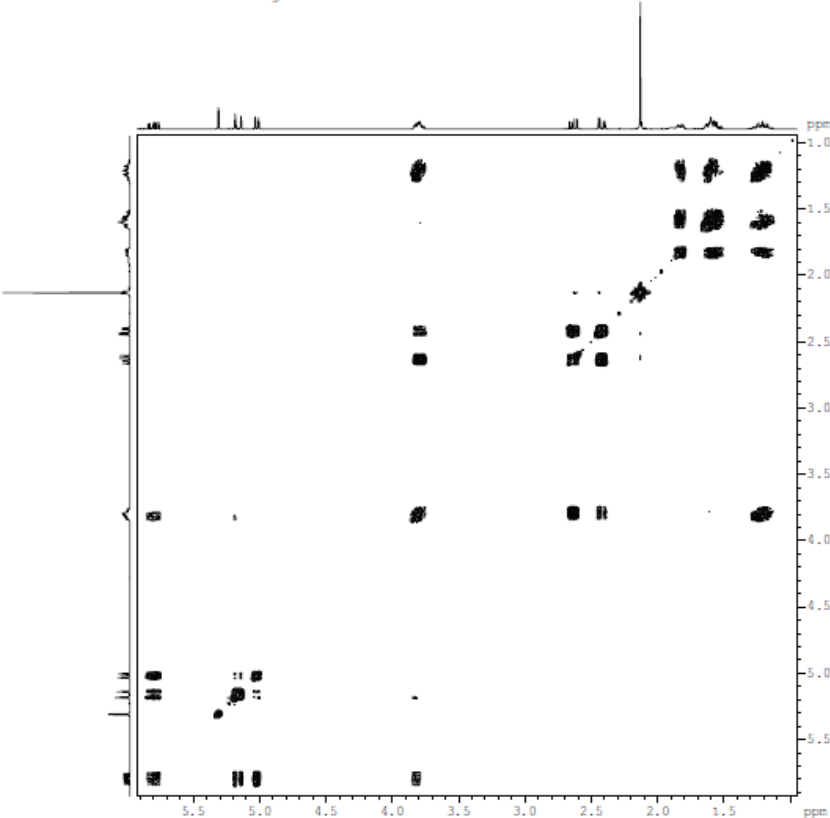

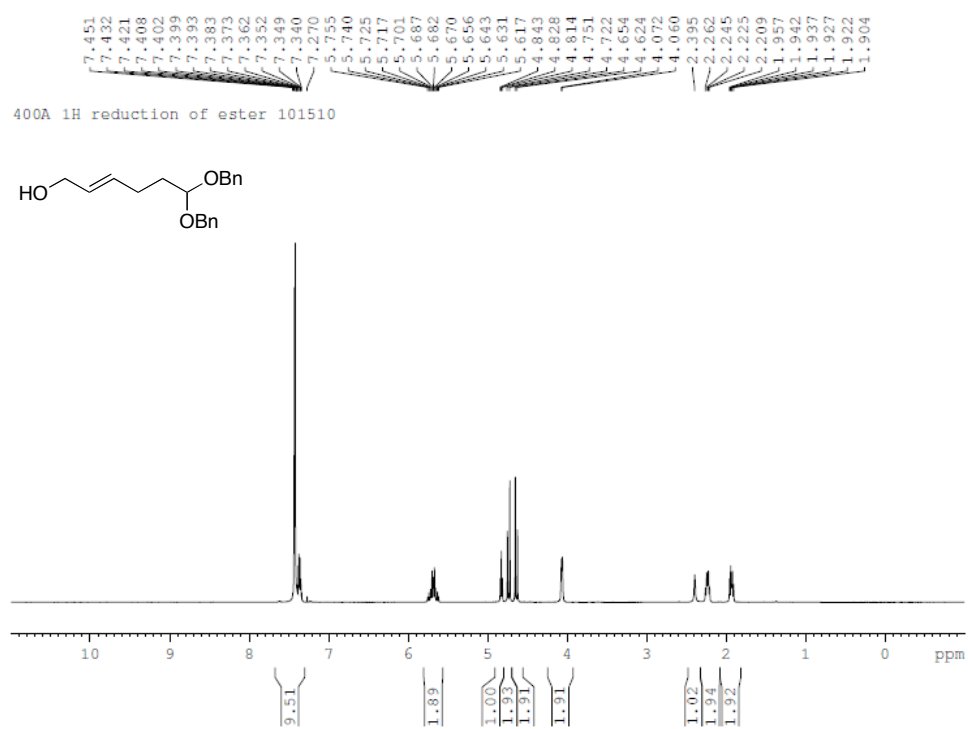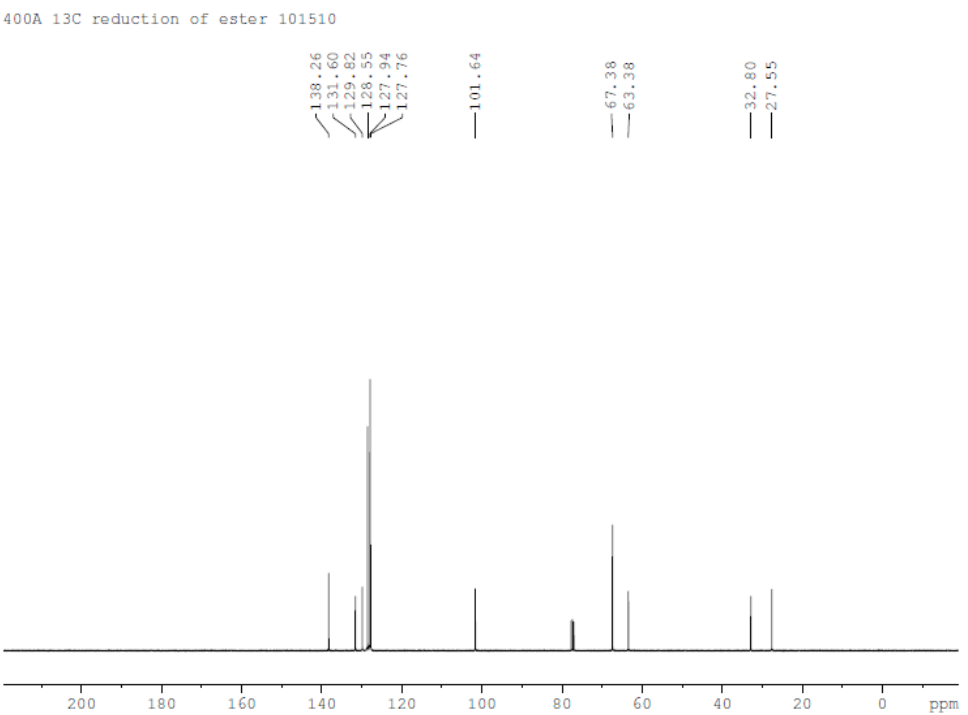



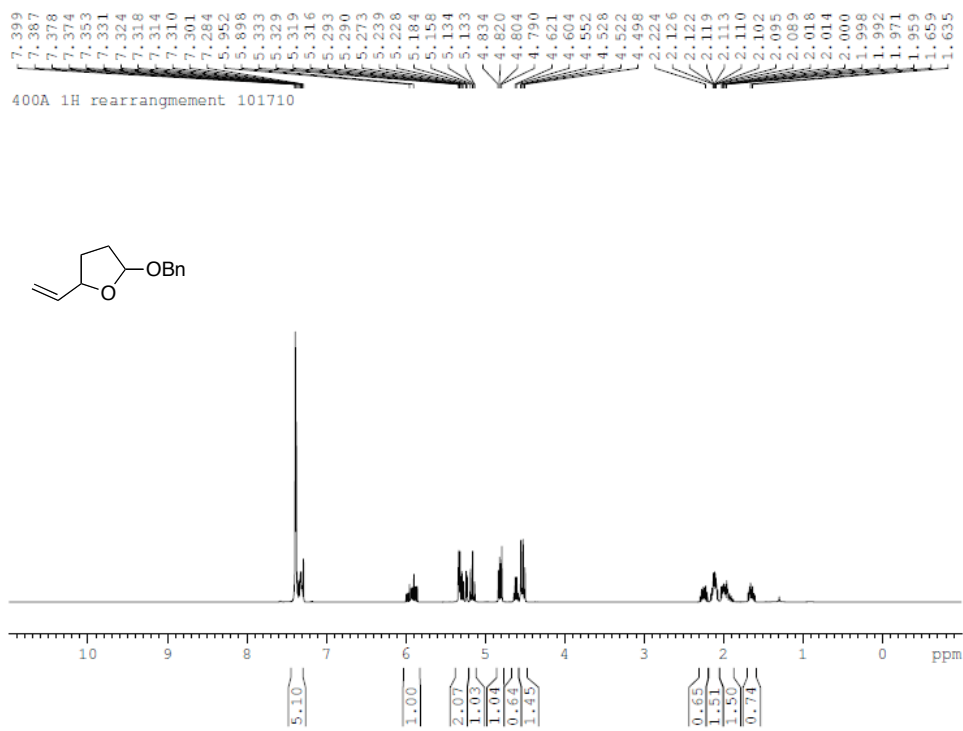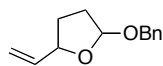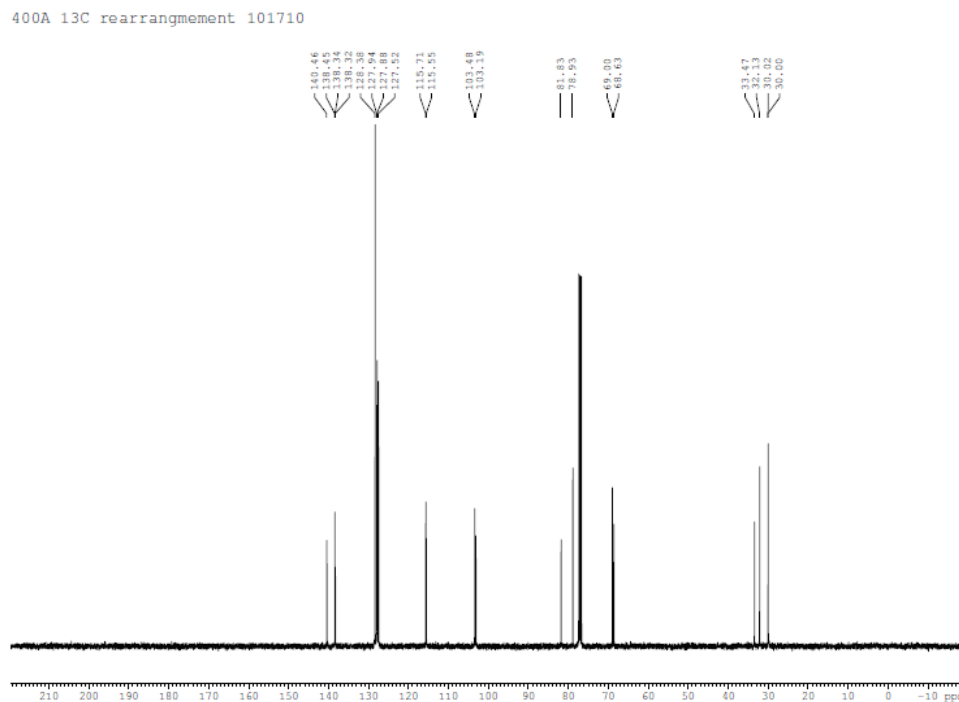

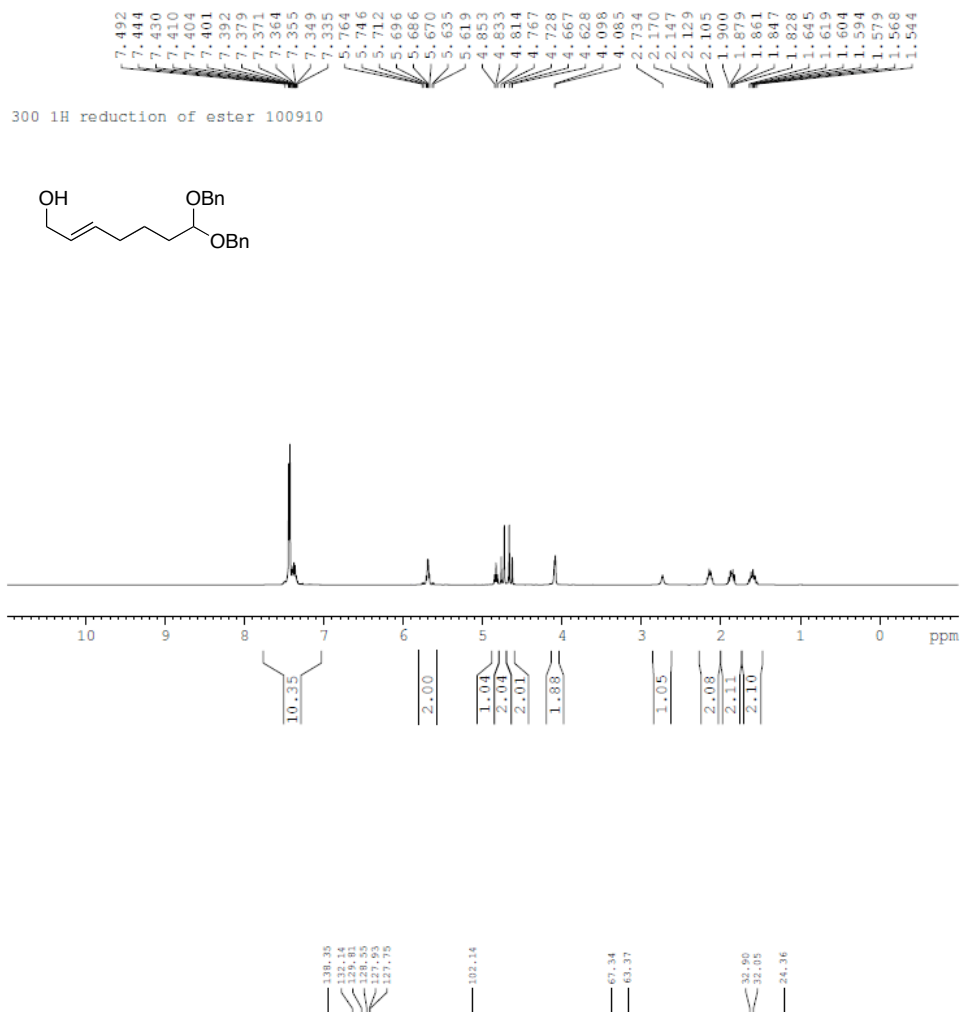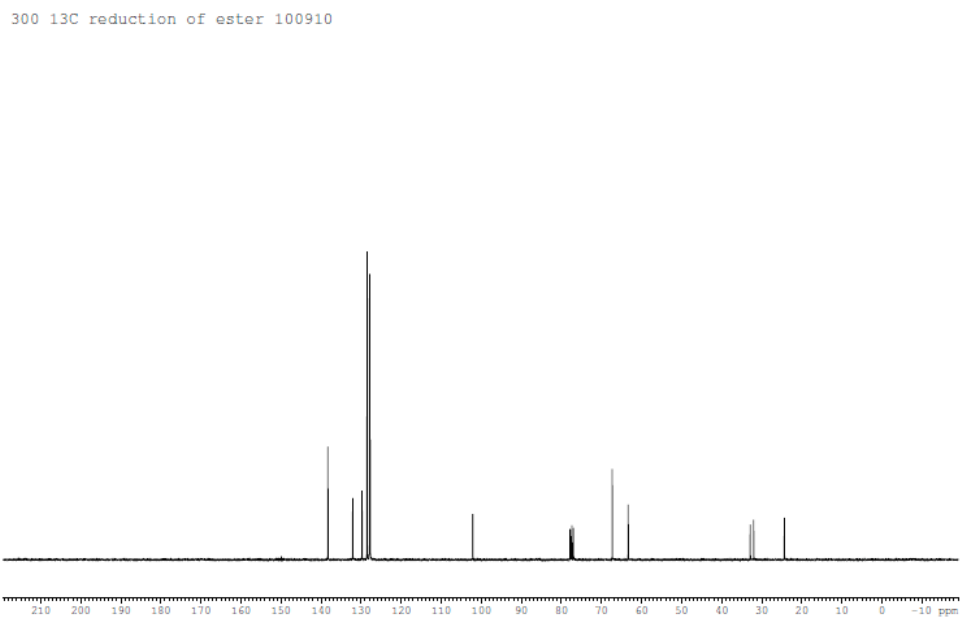

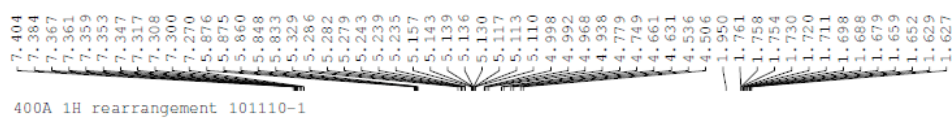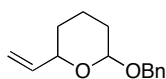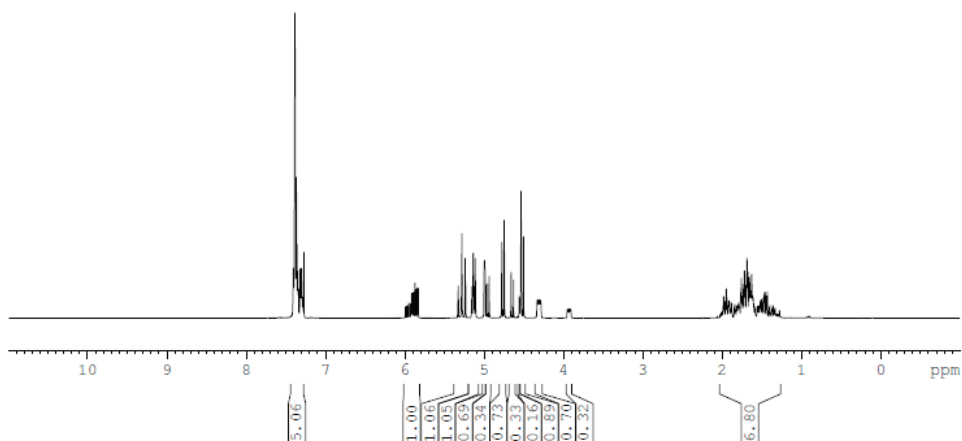

400A 13C rearrangement 101110-1

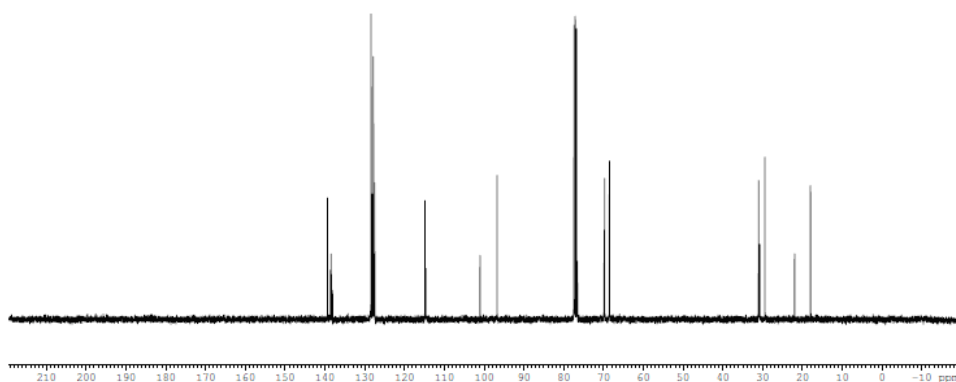







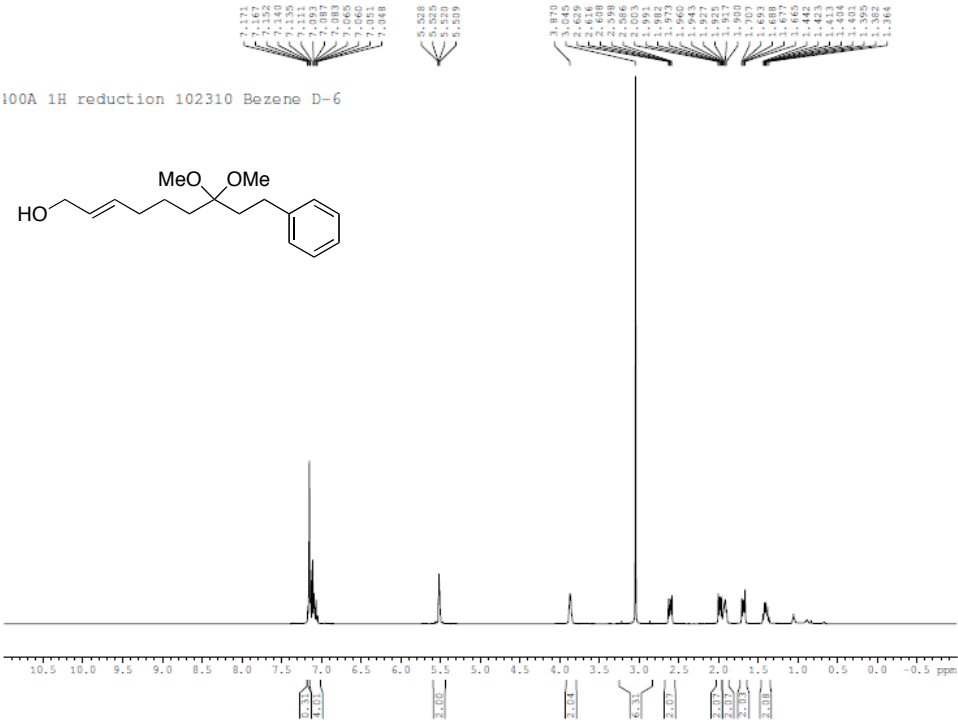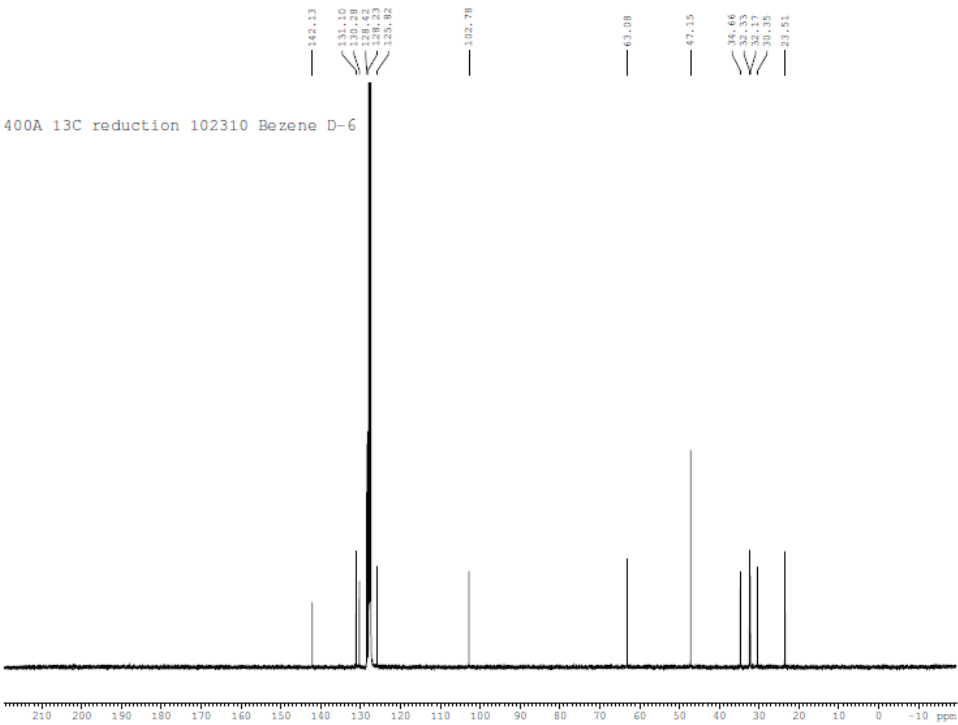



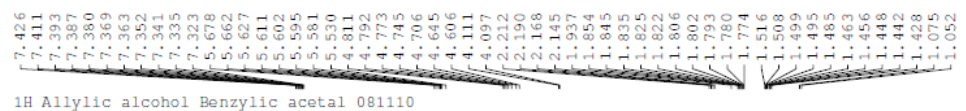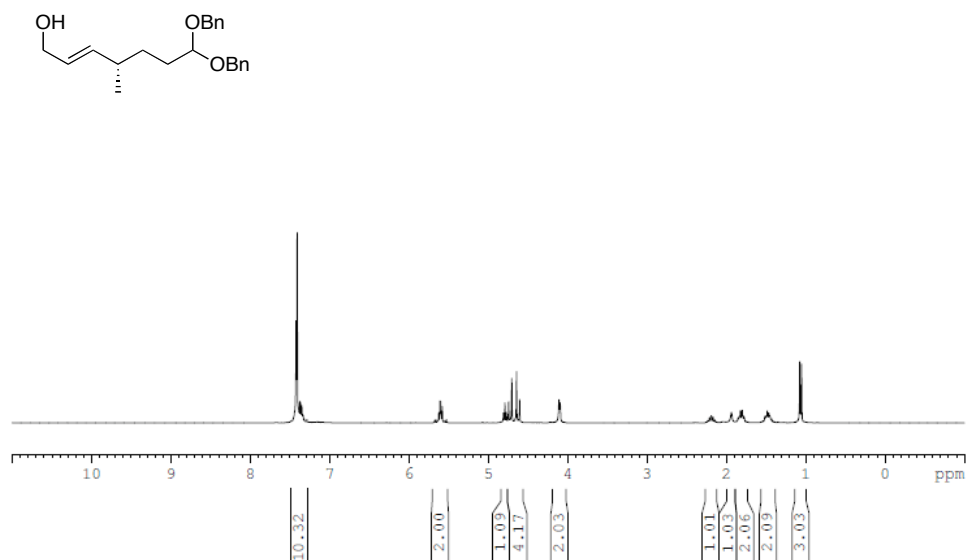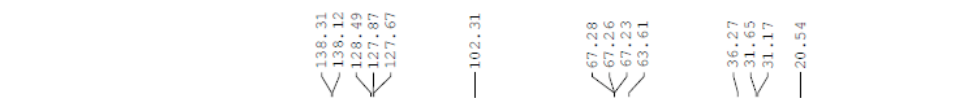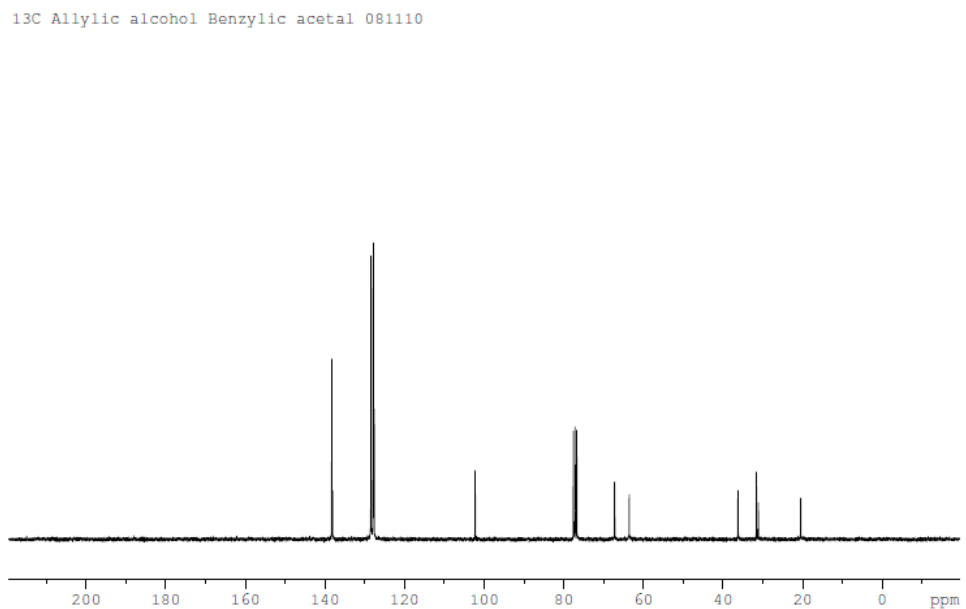

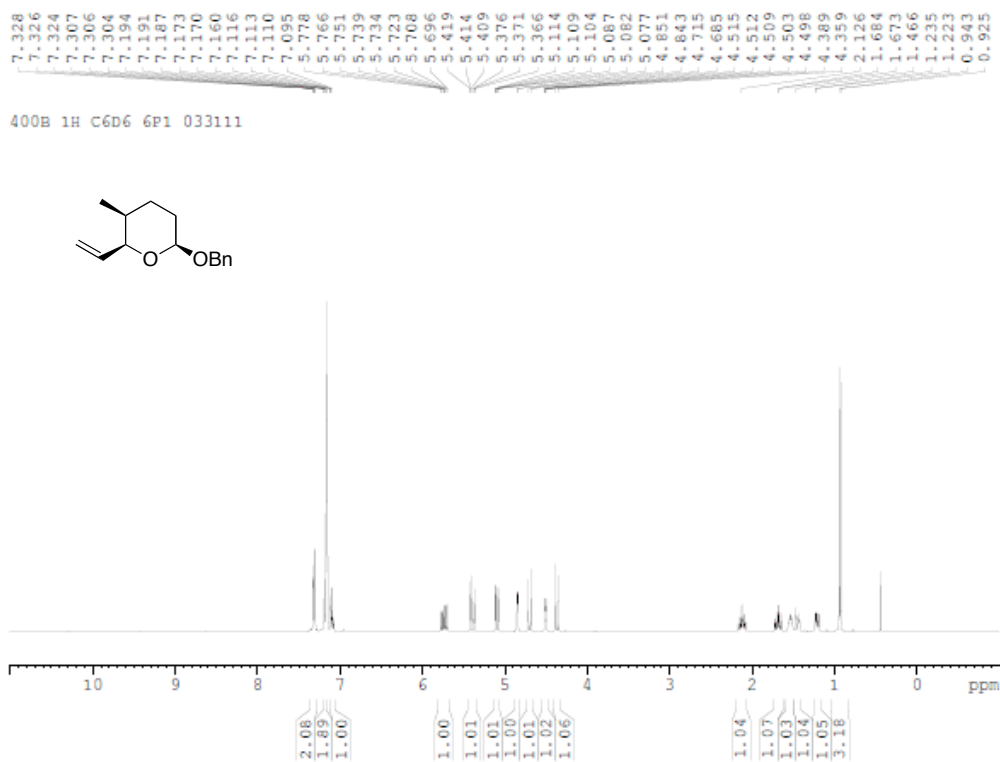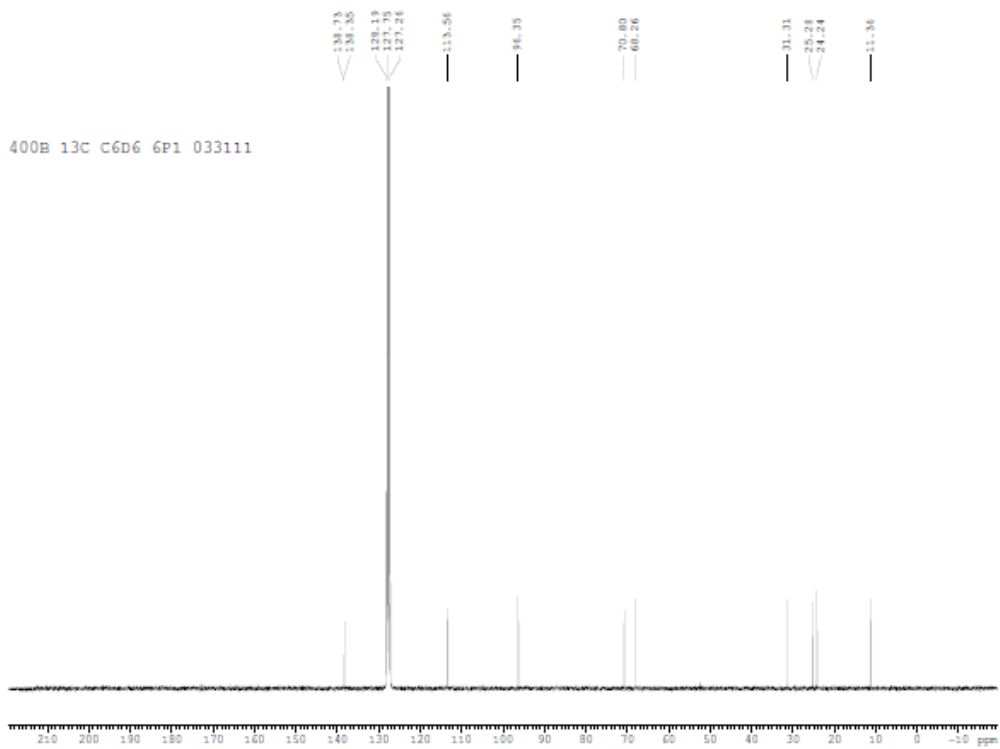

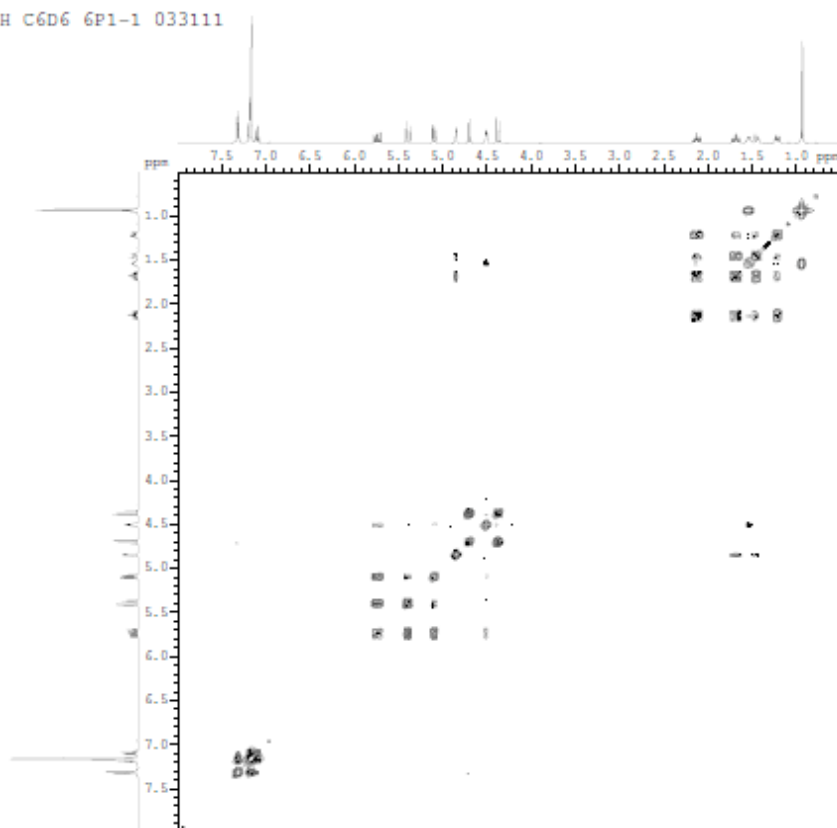

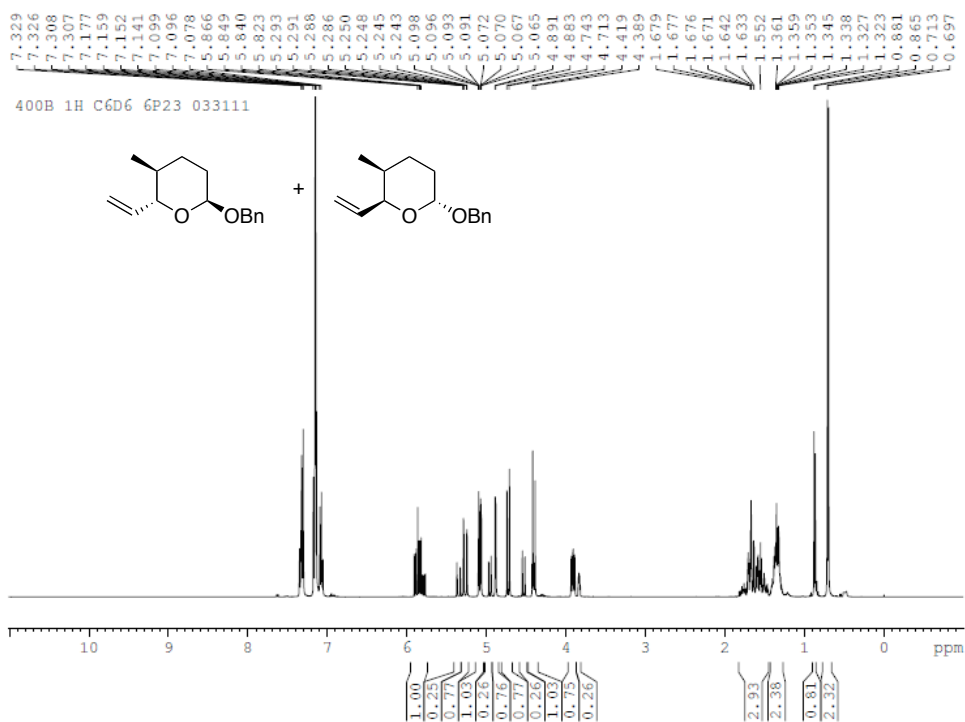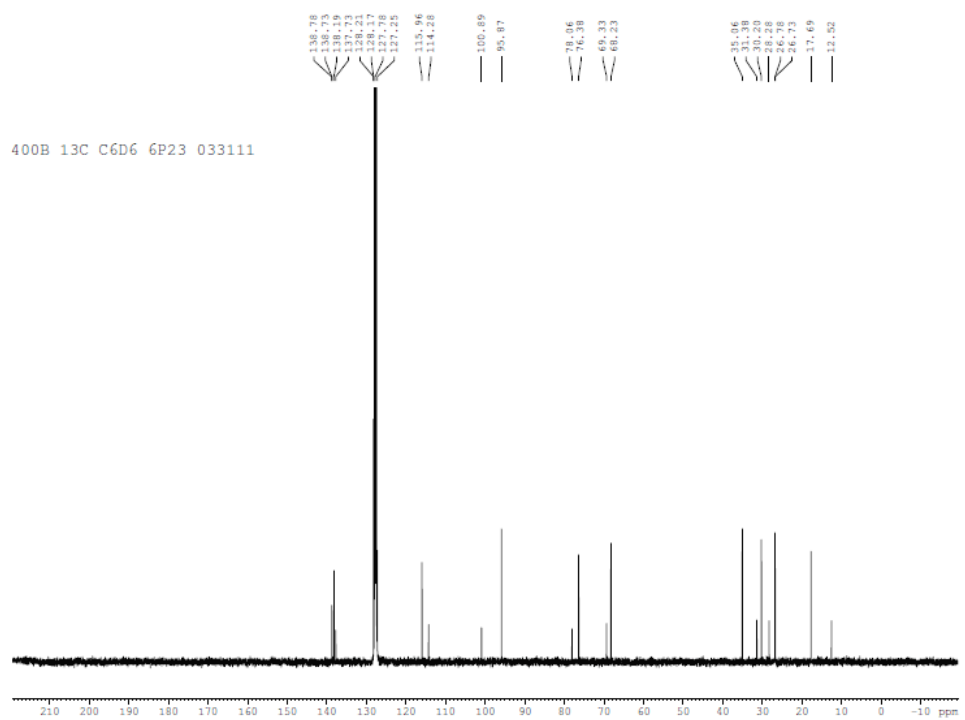

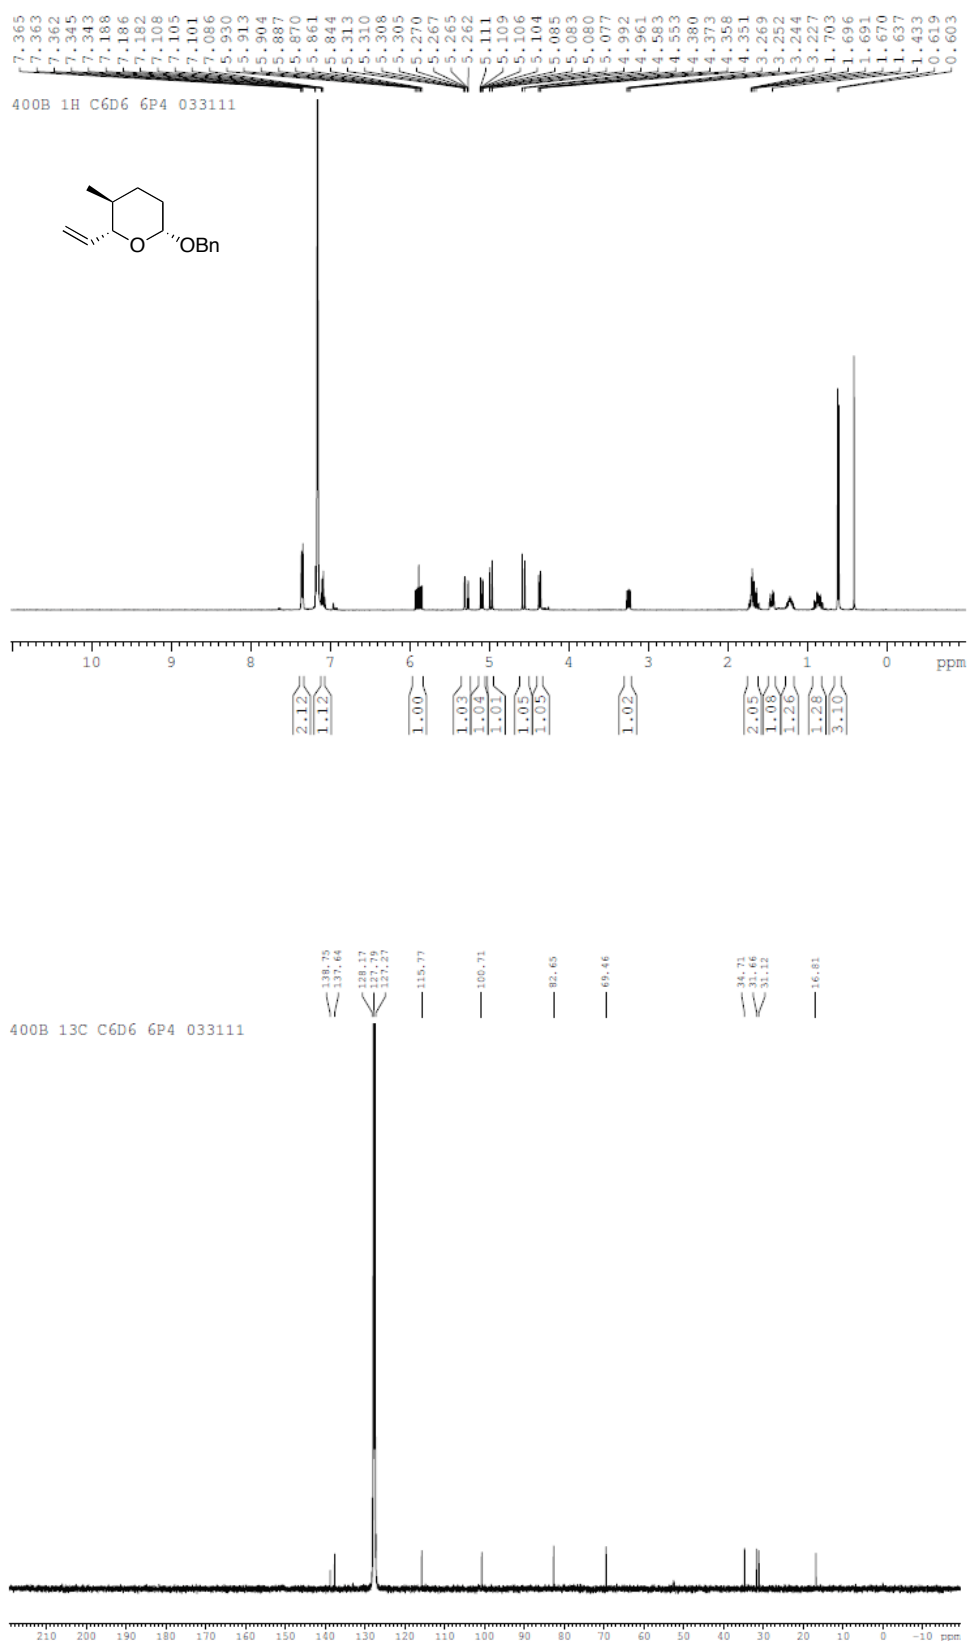

400B 1H COSY C6D6 6P4 033111

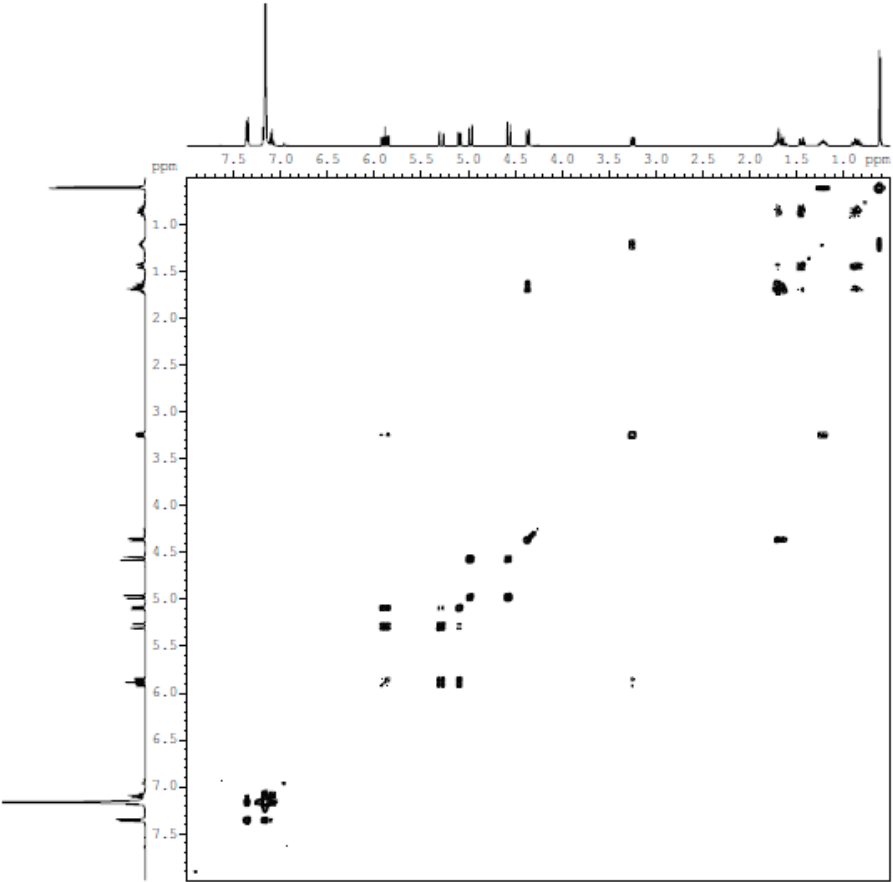



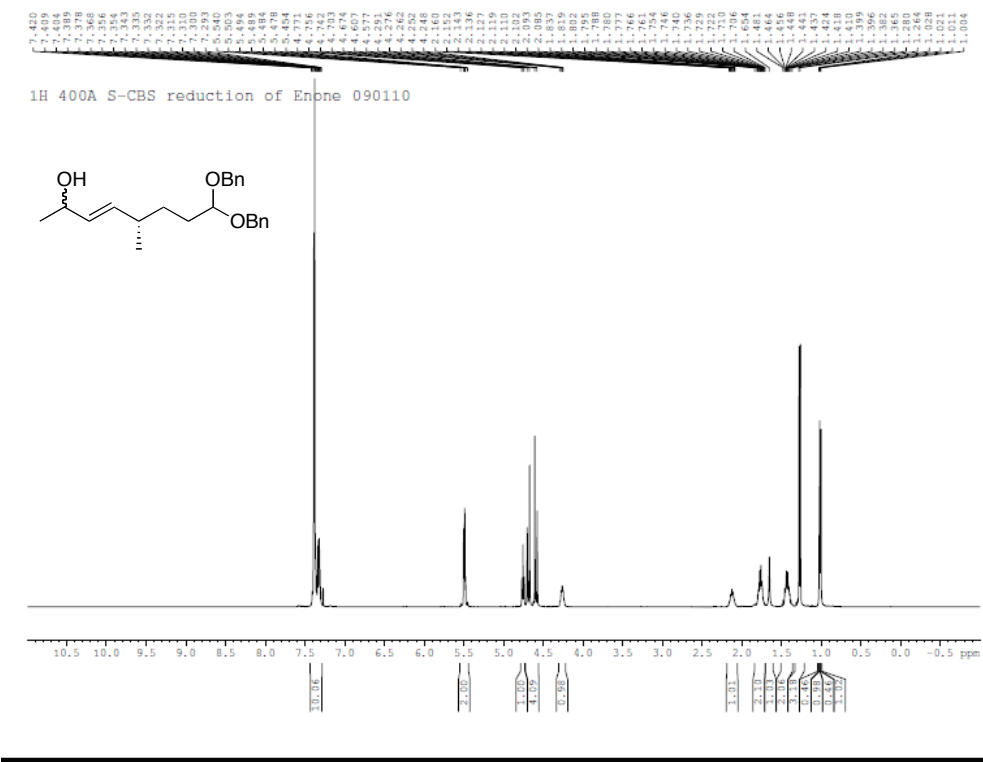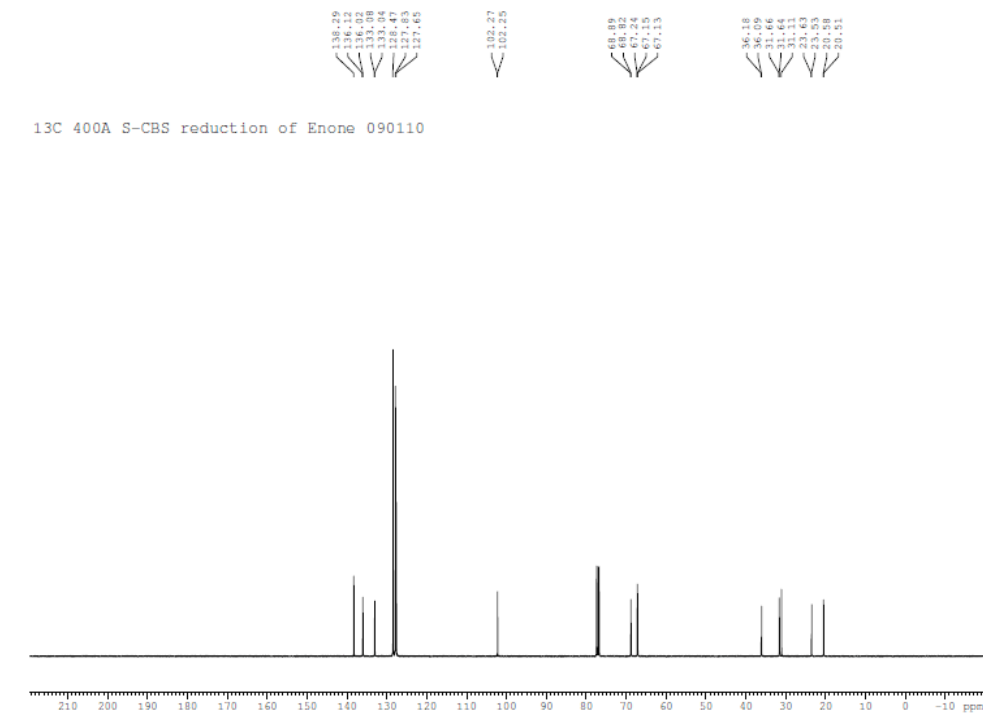



400B 1H COSY CD2Cl2 7P1 033111

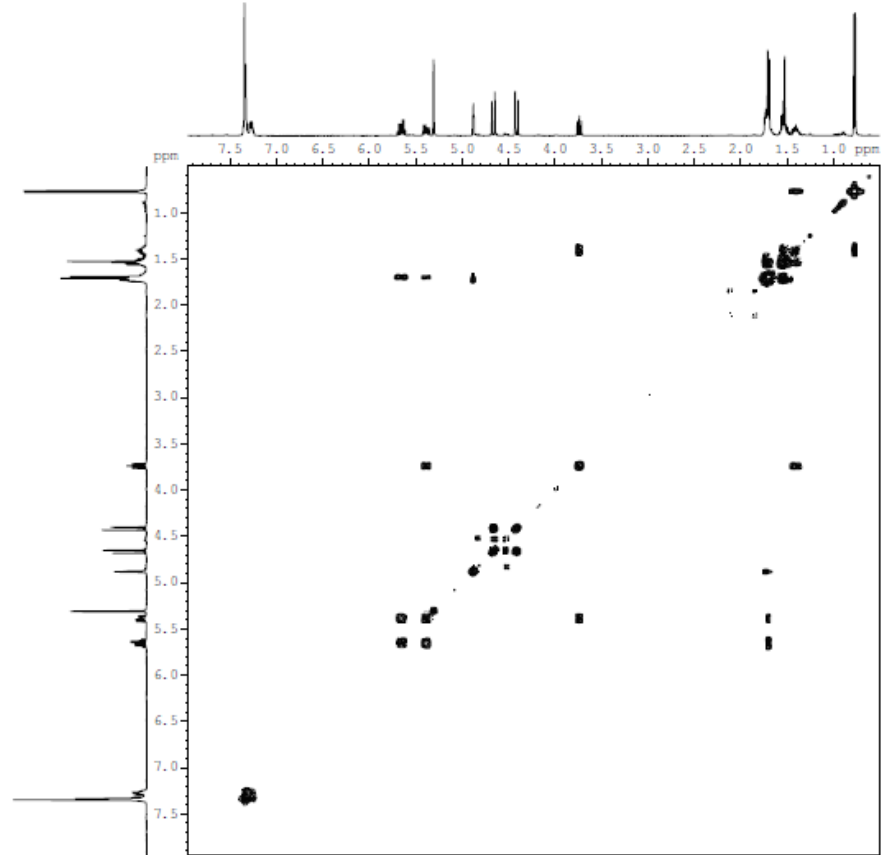

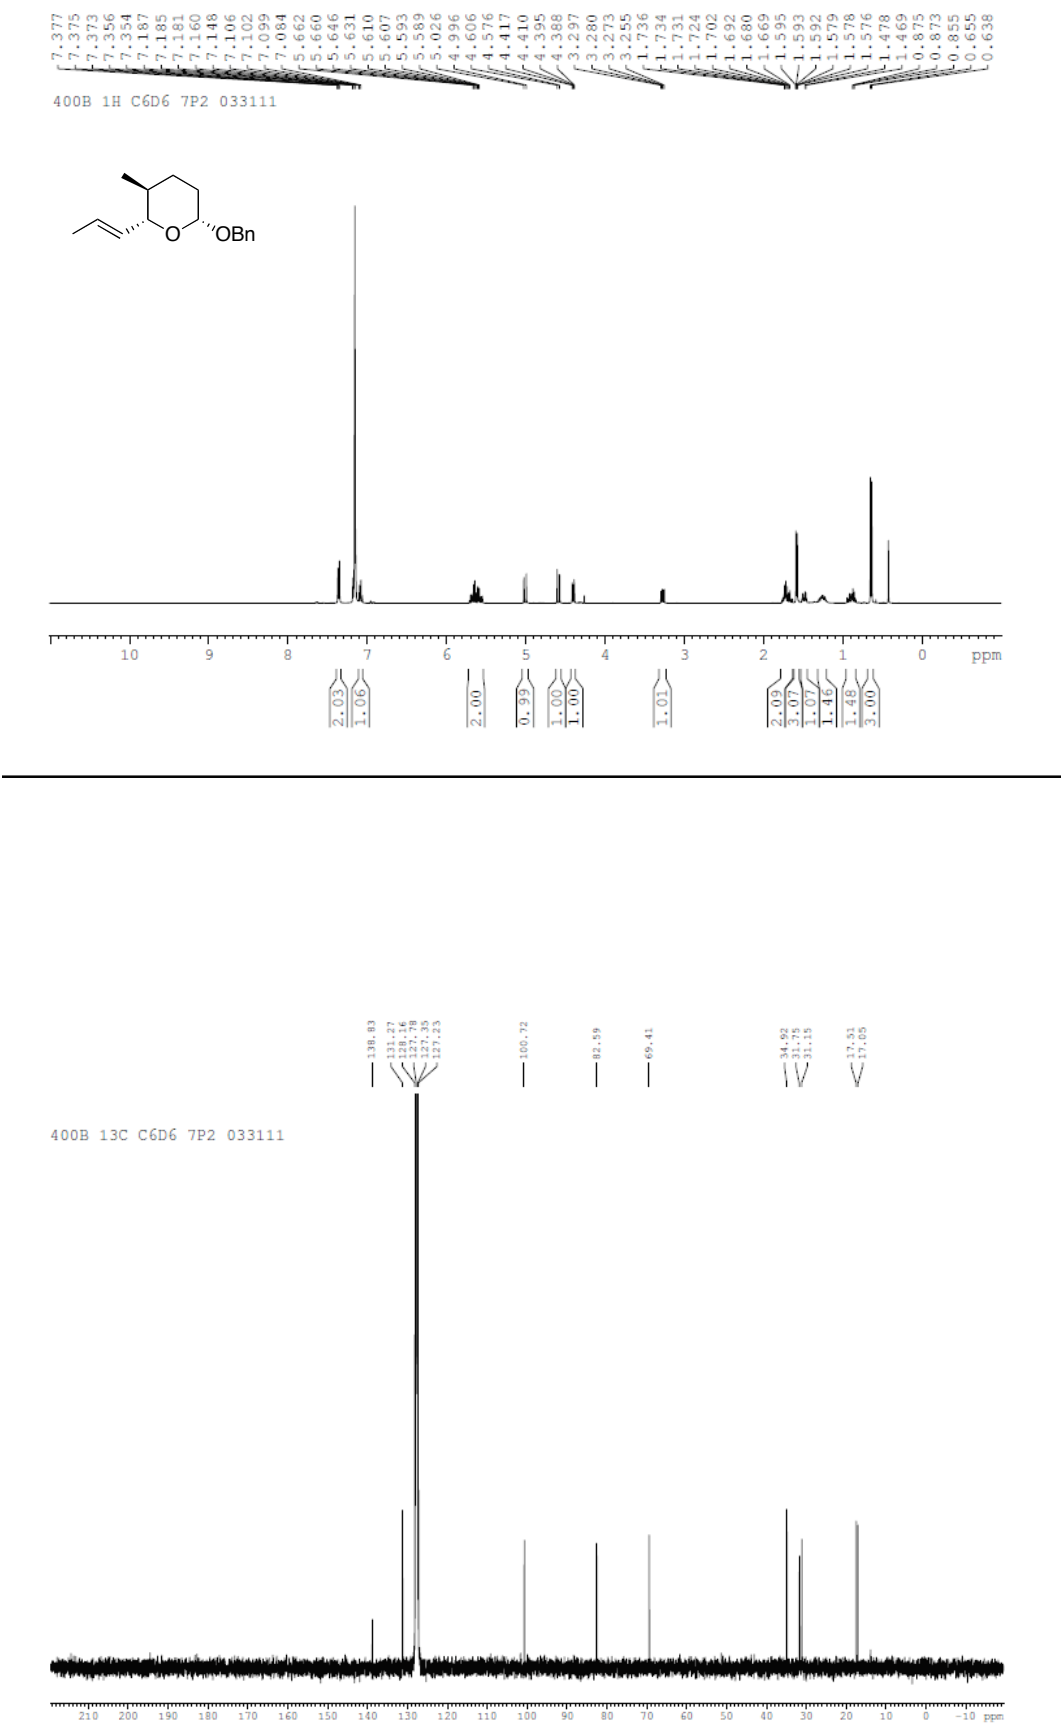

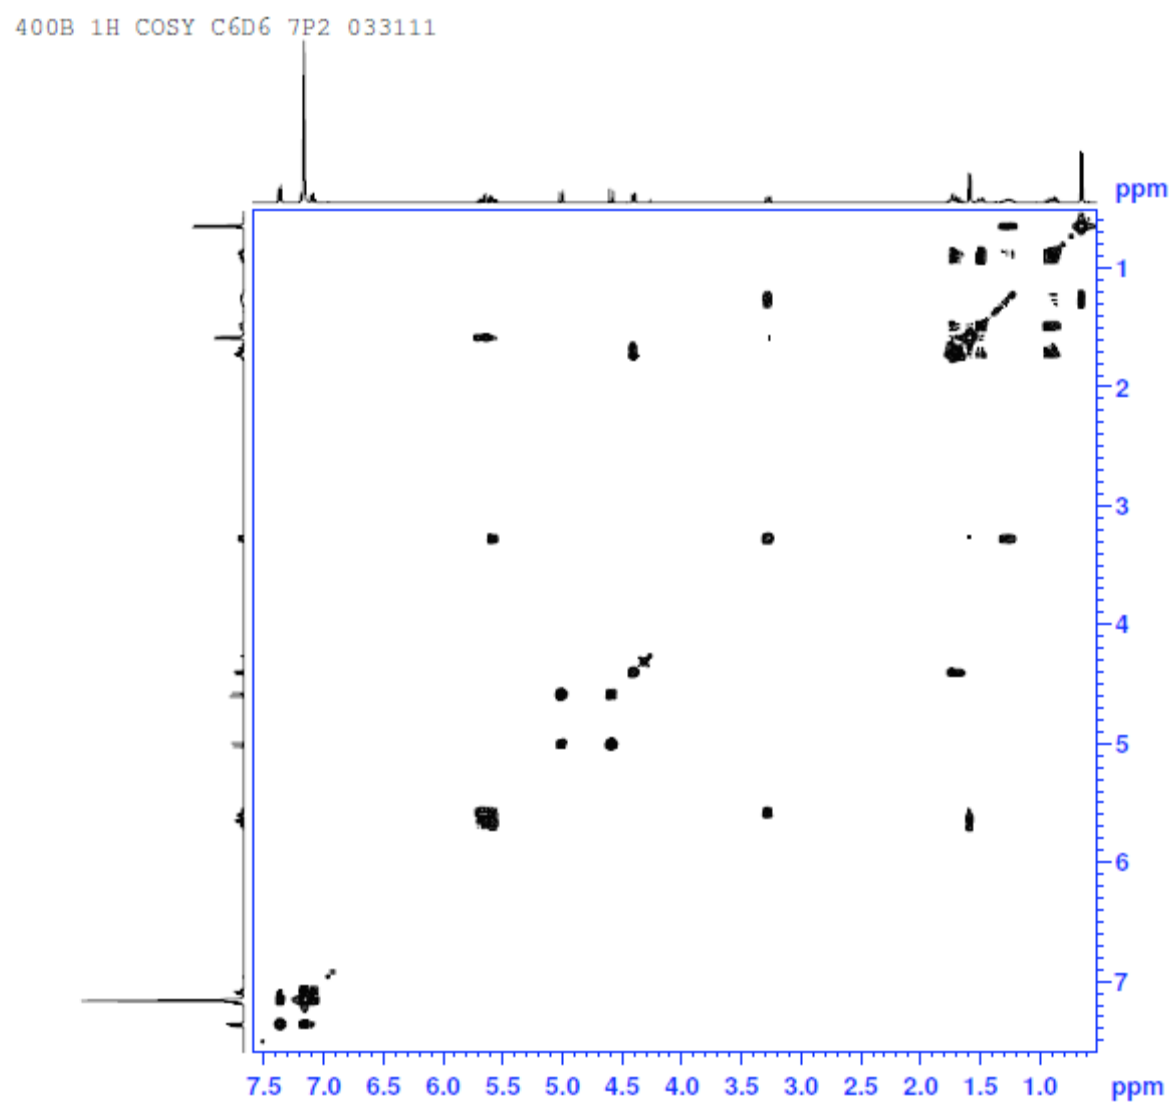





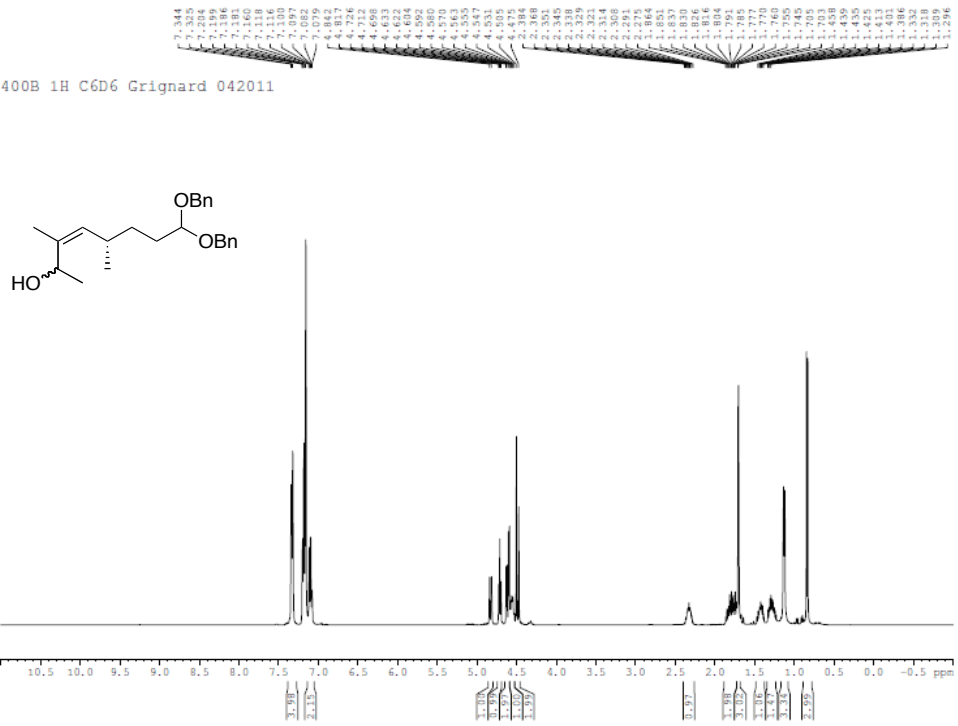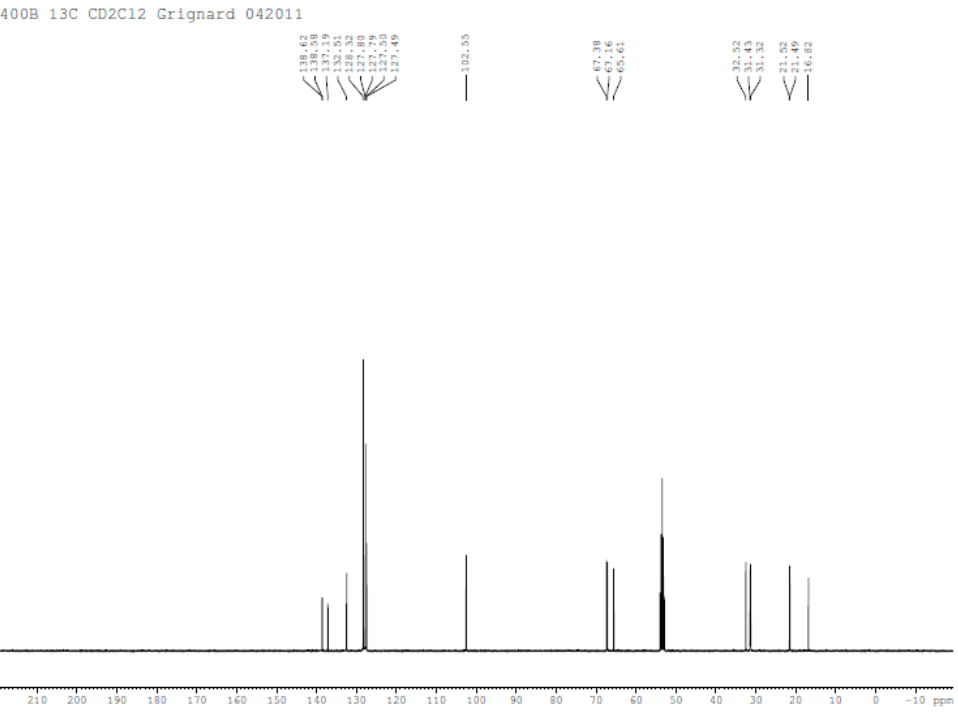



400B 1H COSY CD2Cl2 Grignard 042011

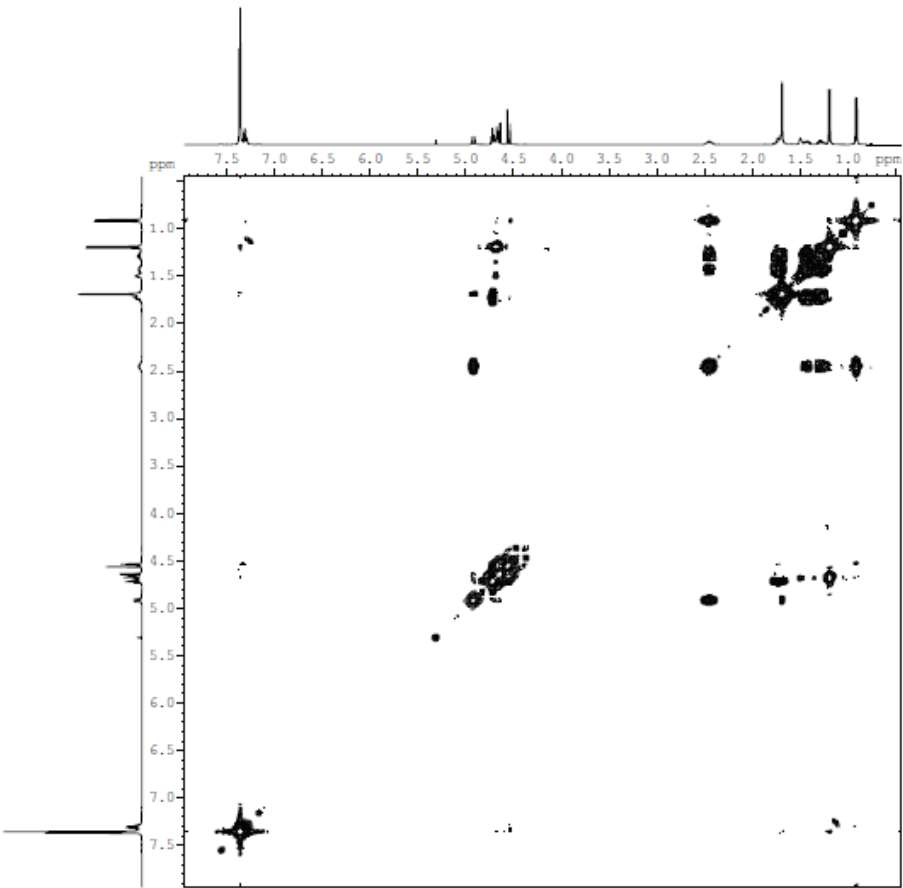

400B 1H NOESY C6D6 Grignard 042011

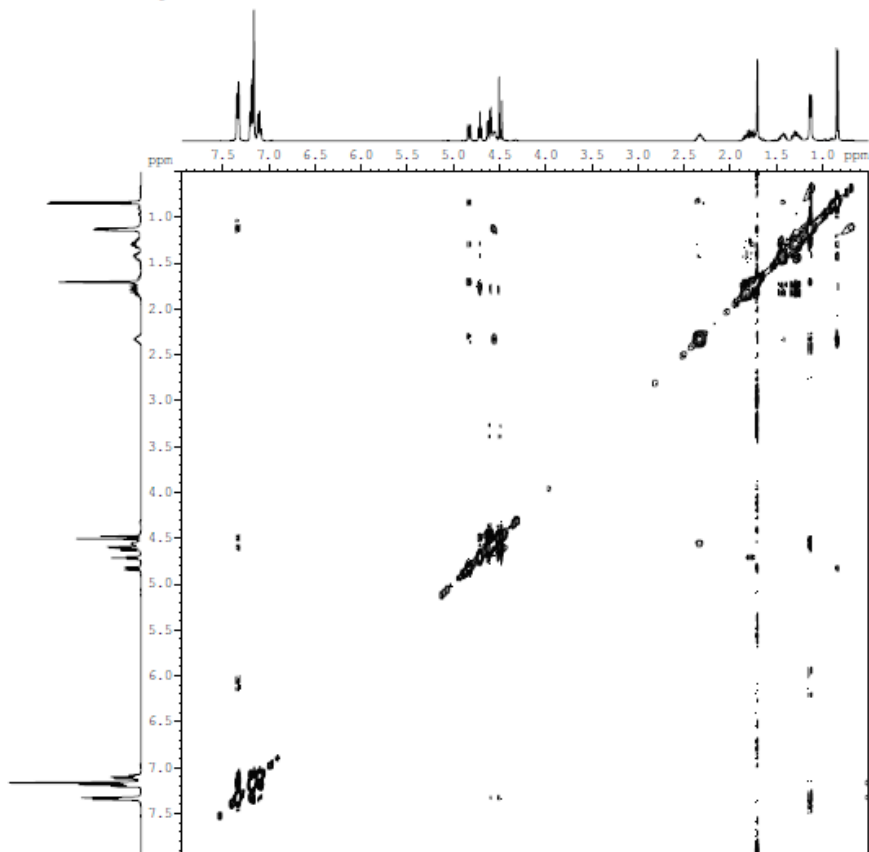

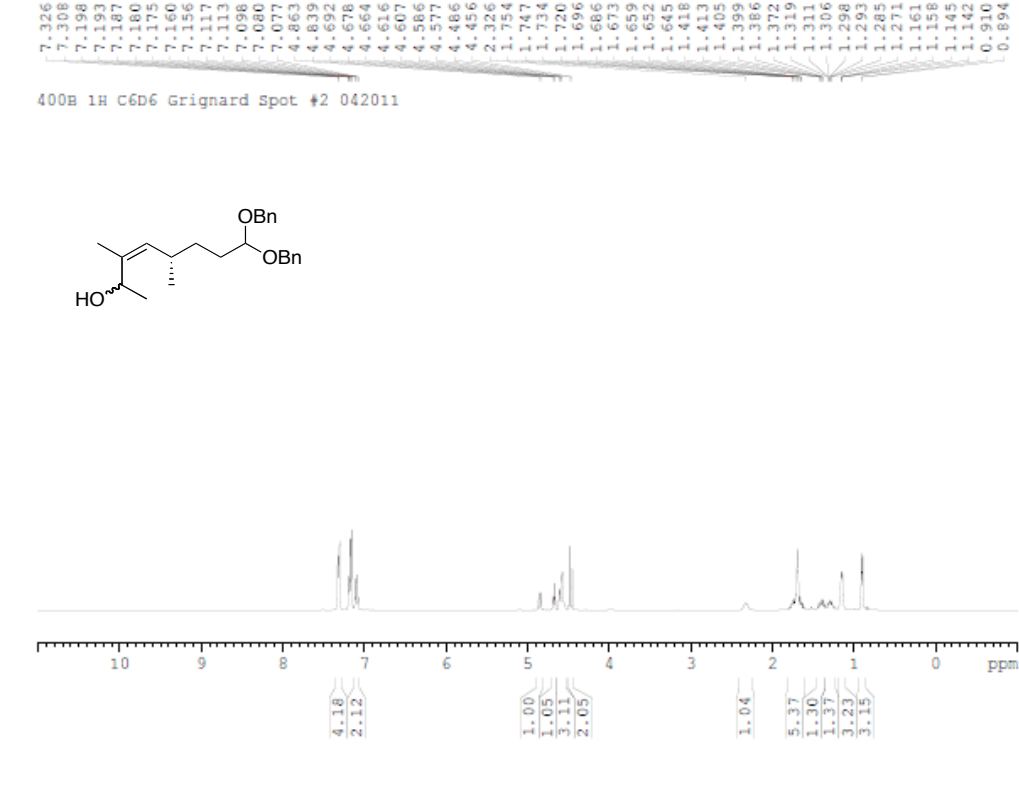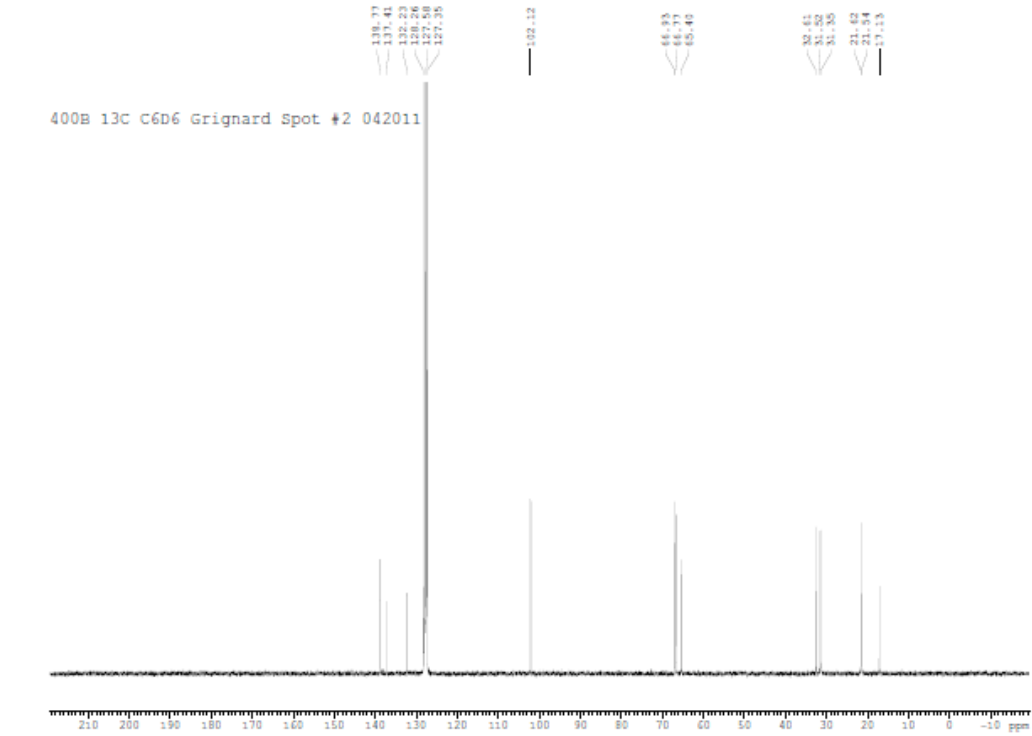

400B 1H COSY C6D6 Grignard Spot #2 042011

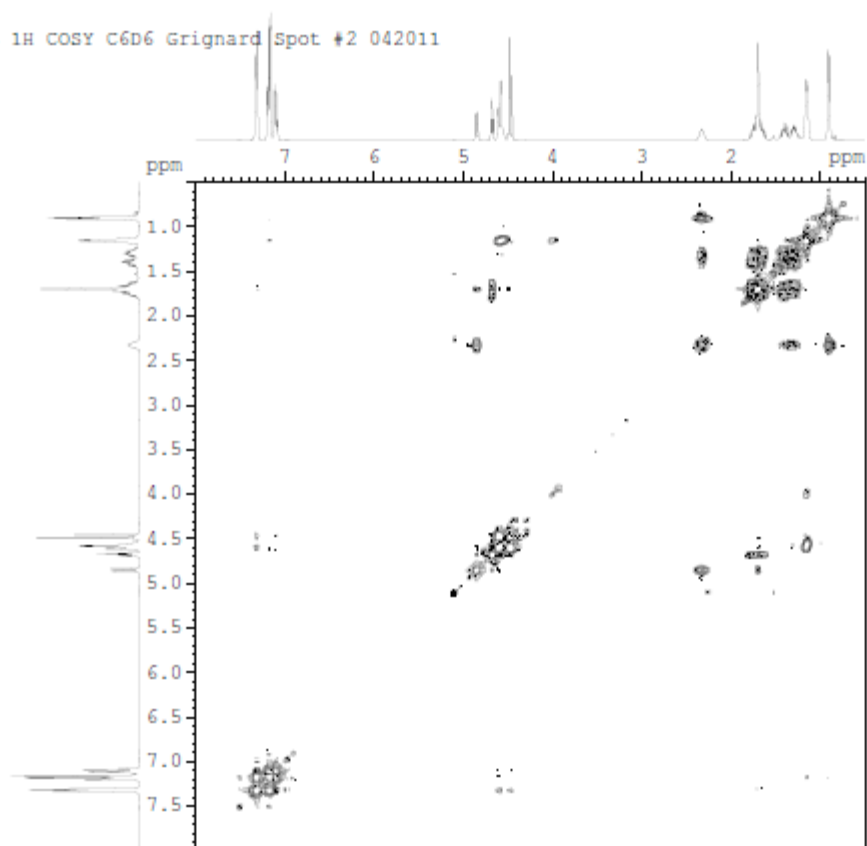

400B 1H NOESY C6D6 Grignard Spot #2 042011

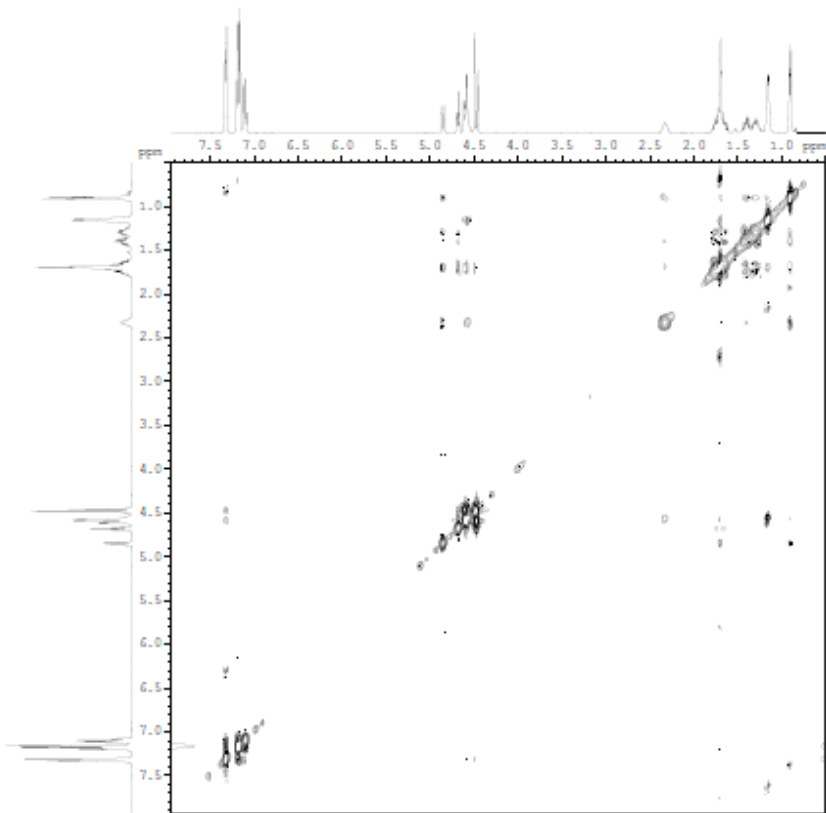



400B 1H COSY C6D6 X2P1-2 0421111

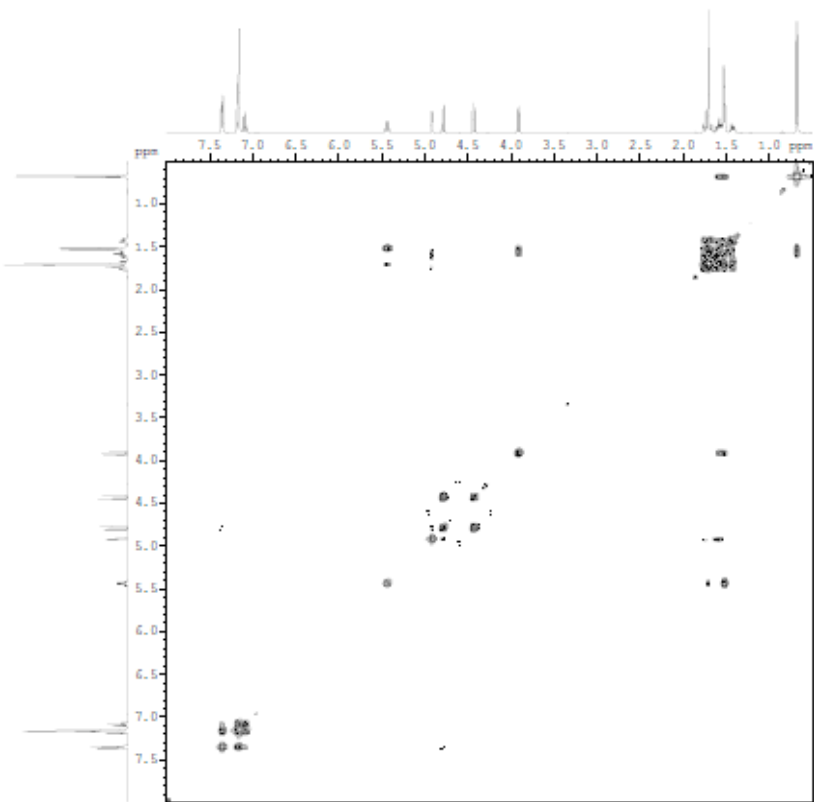

400B 1H NOESY C6D6 X2P1-2 042111

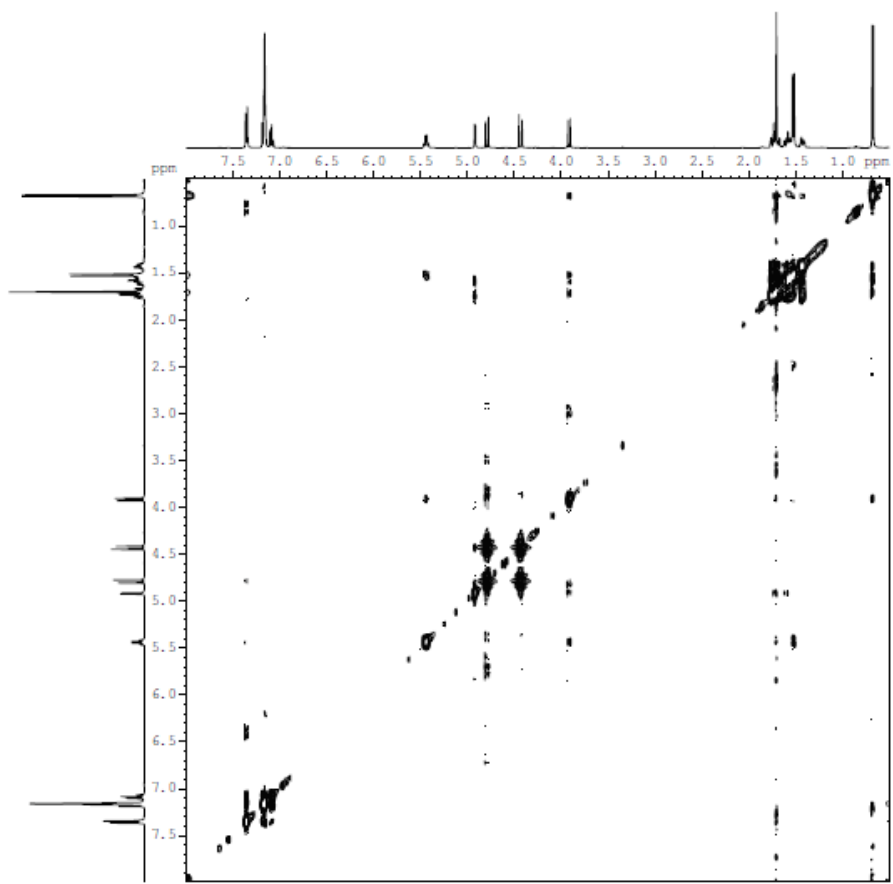



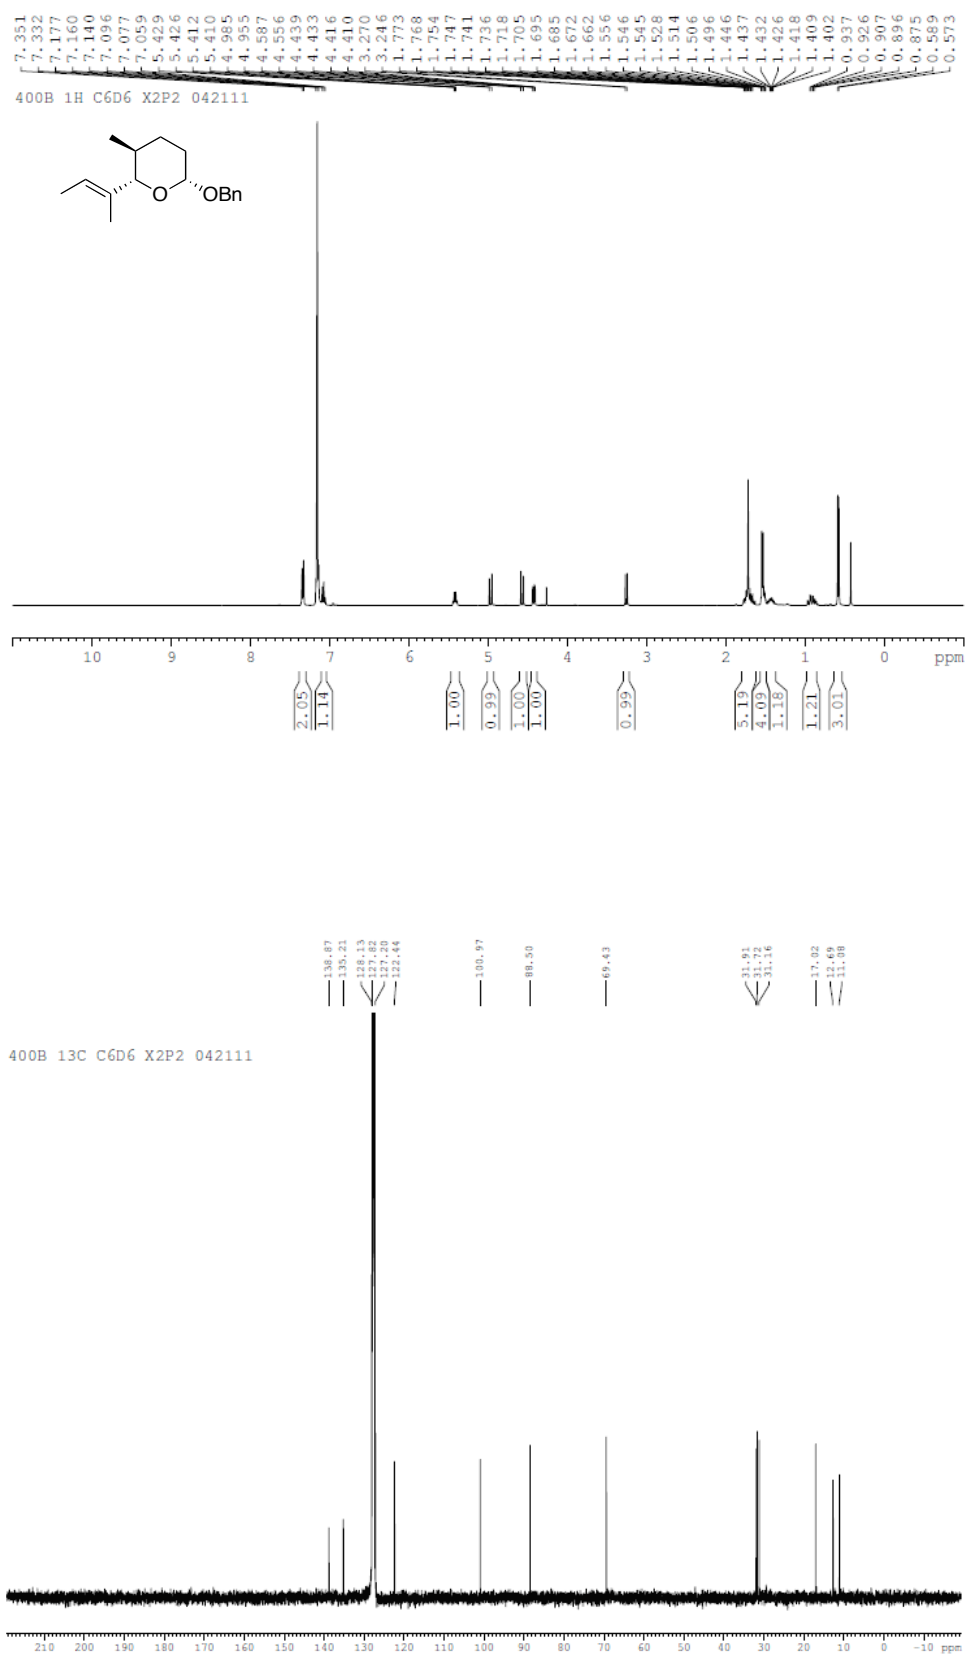

400B 1H COSY C6D6 X2P2 042111

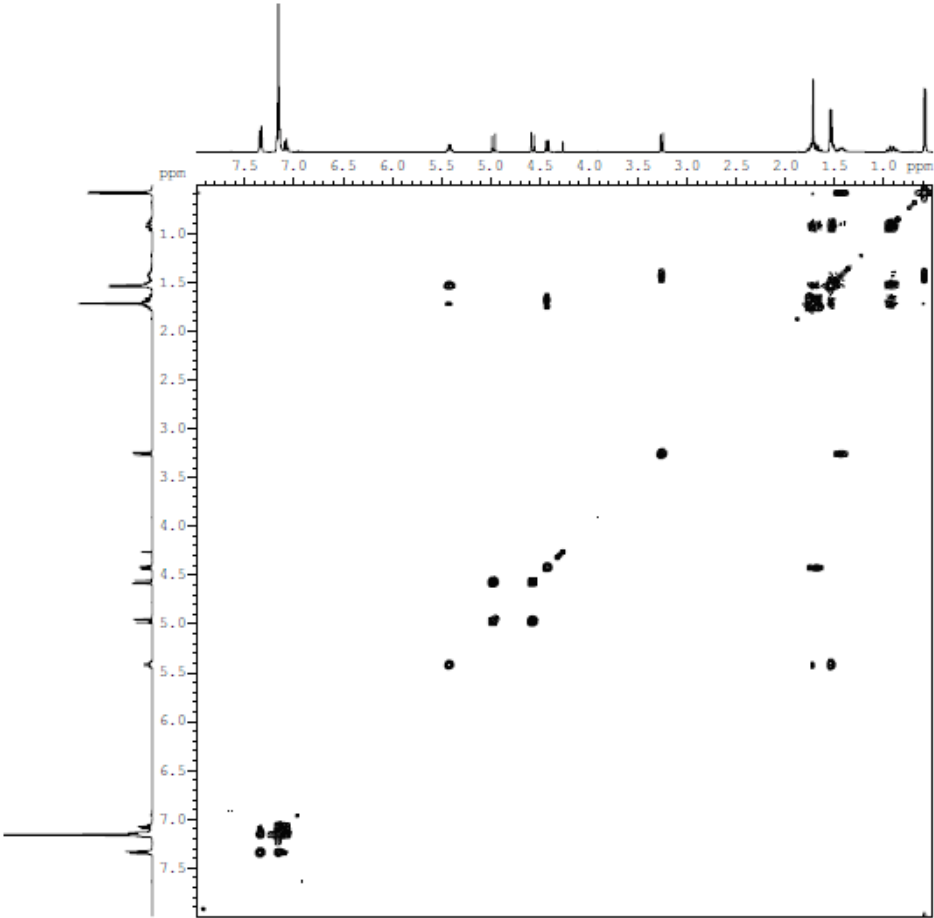

400B 1H NOESY C6D6 X2P2 042111

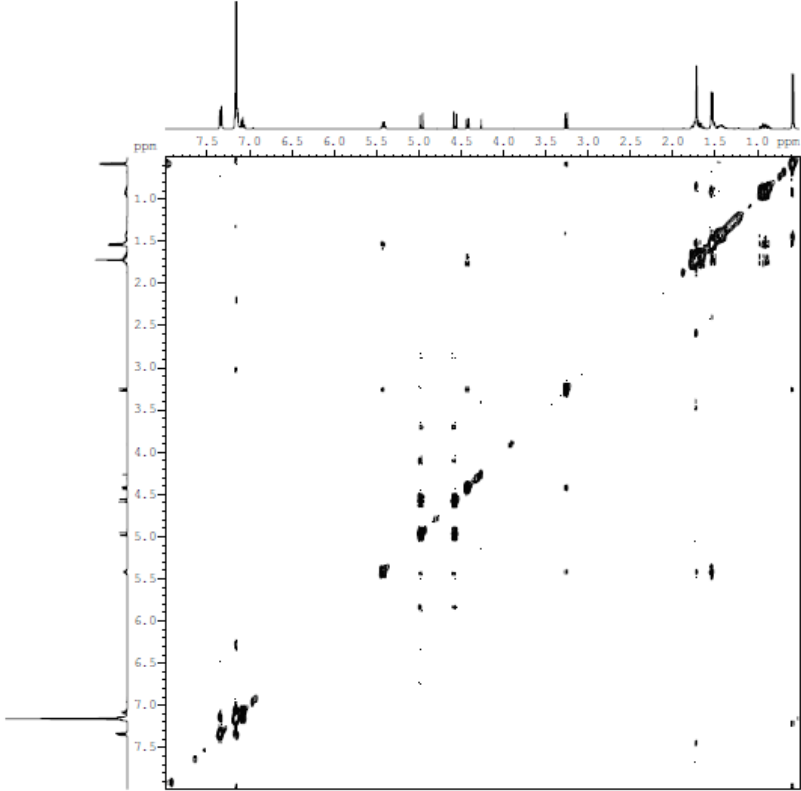

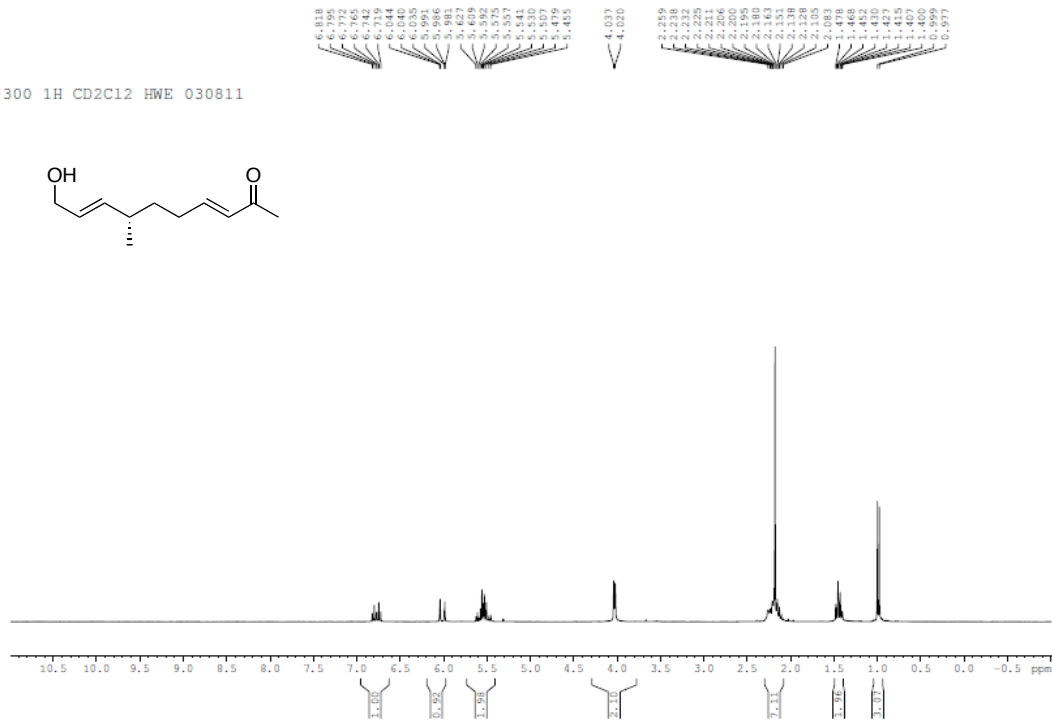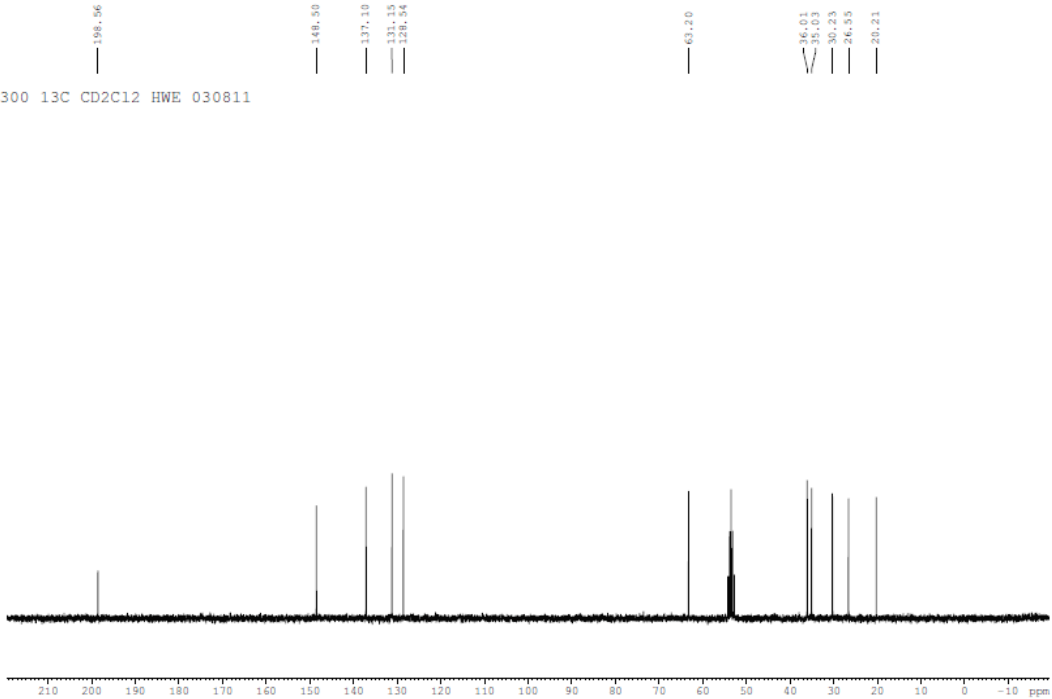



400B 1H COSY CD2Cl2 Rearrangement Major Product 031011-1

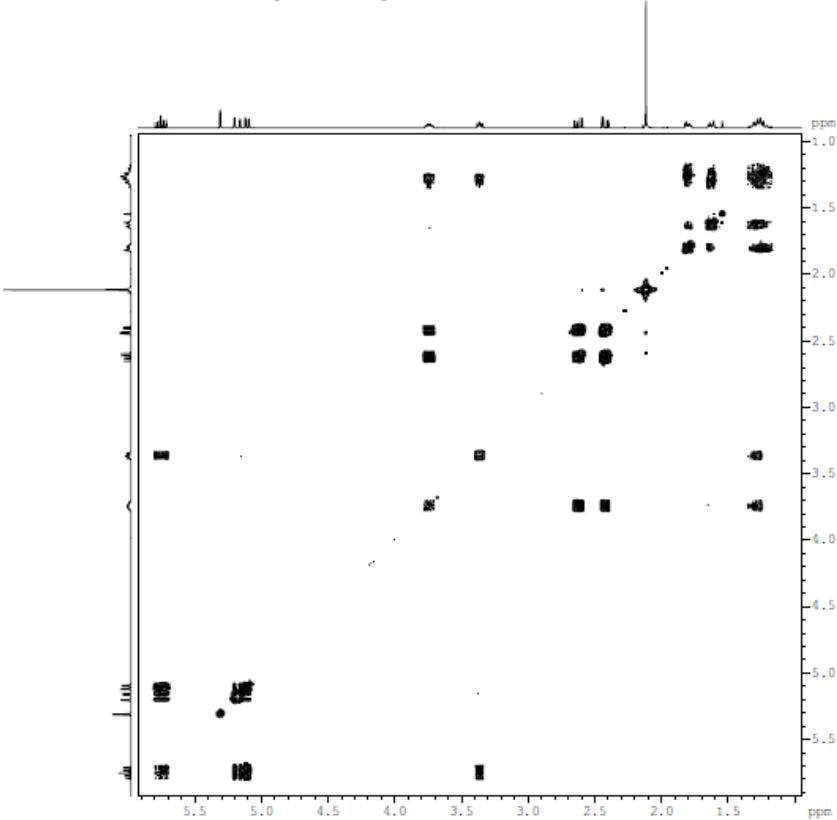

400B 1H CD2Cl2 NOESY Rearrangement Major Product 031011-3

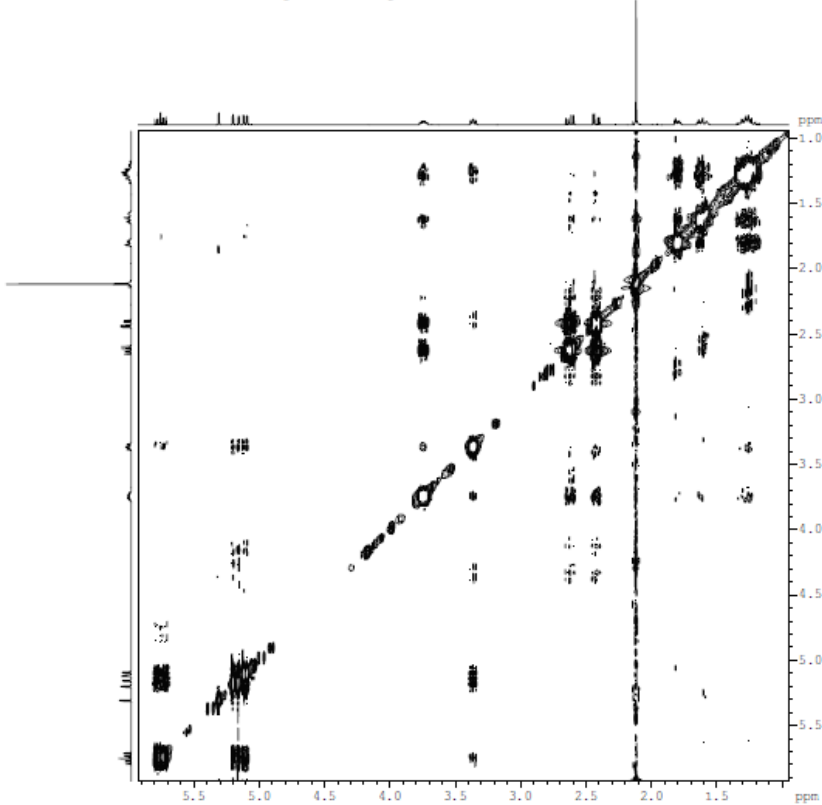

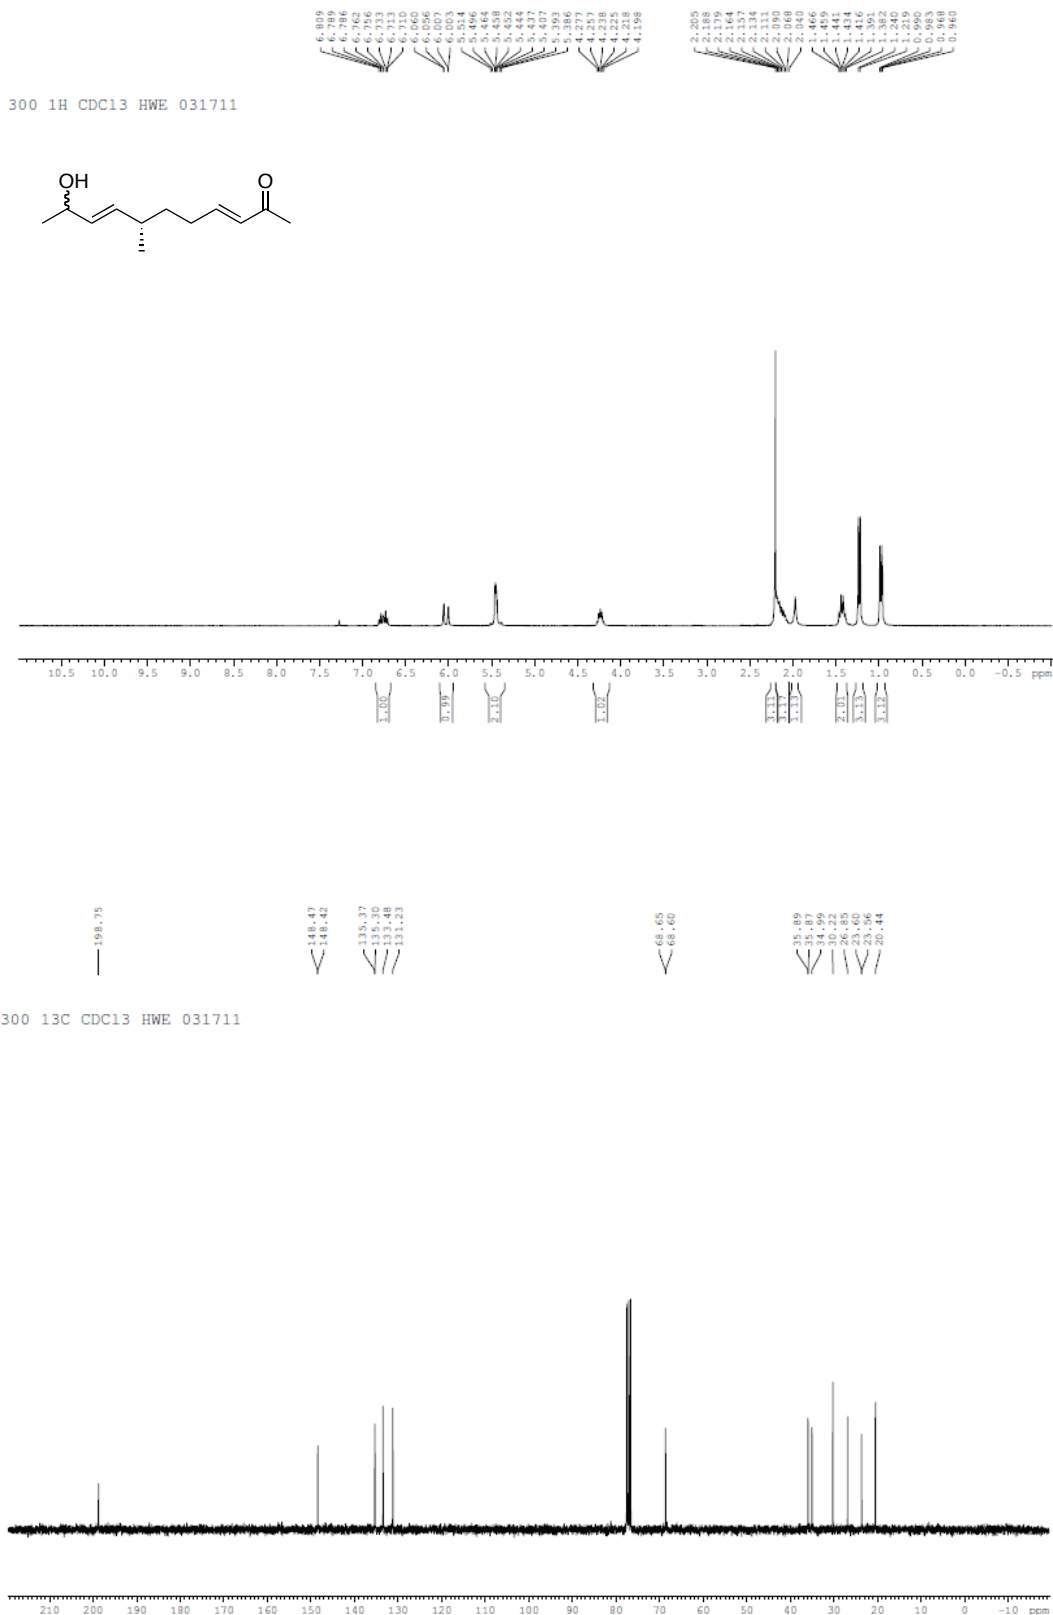



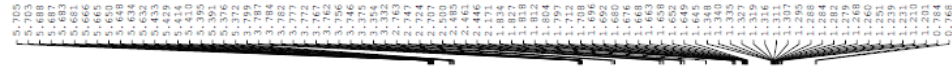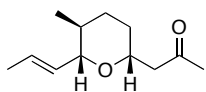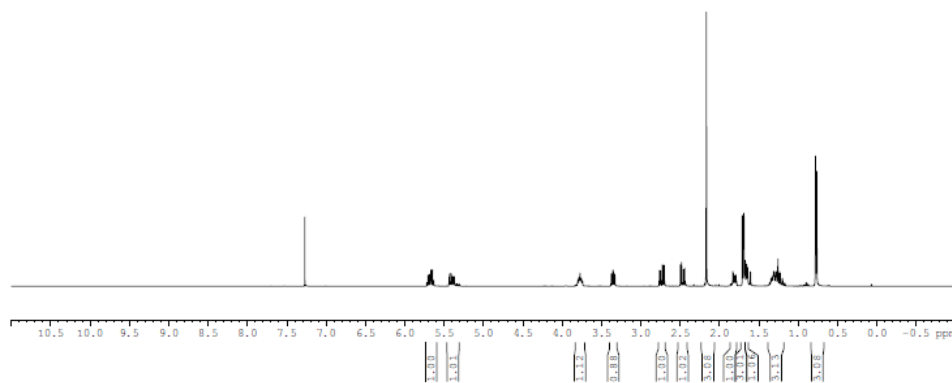

400B 1H COSY CDC13 Rearrangement Major Product 031811-1

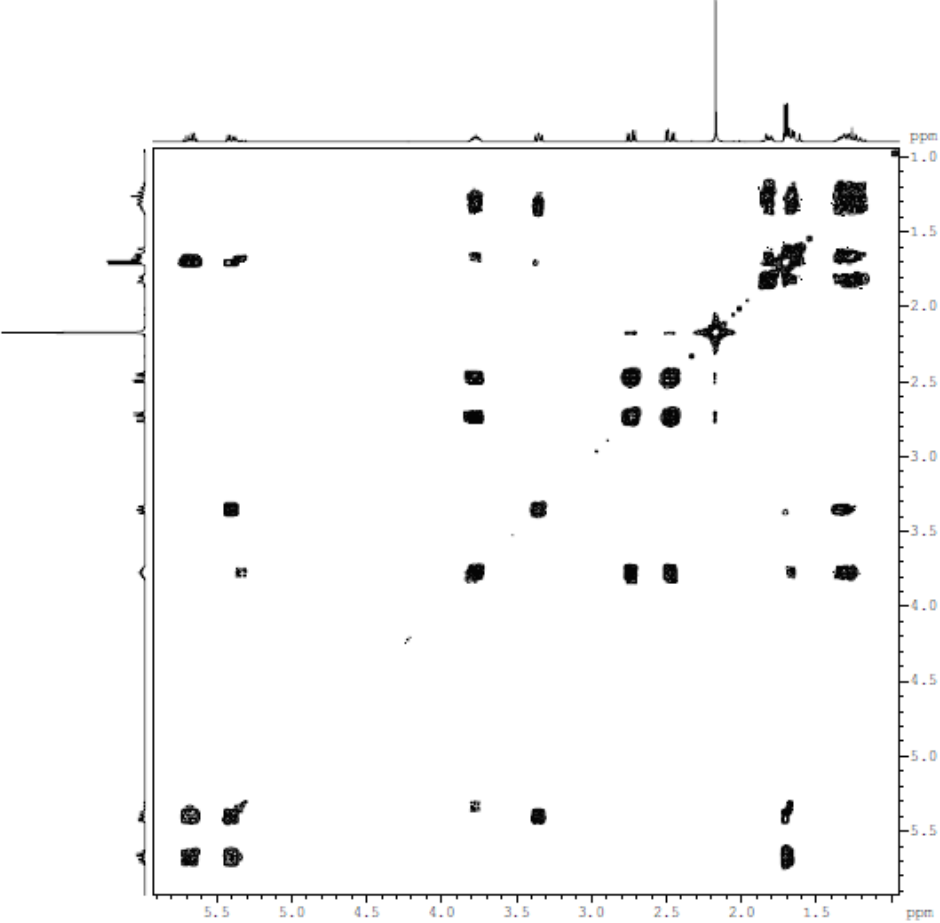

400B 1H NOESY CDC13 Rearrangement Major Product 031811-1

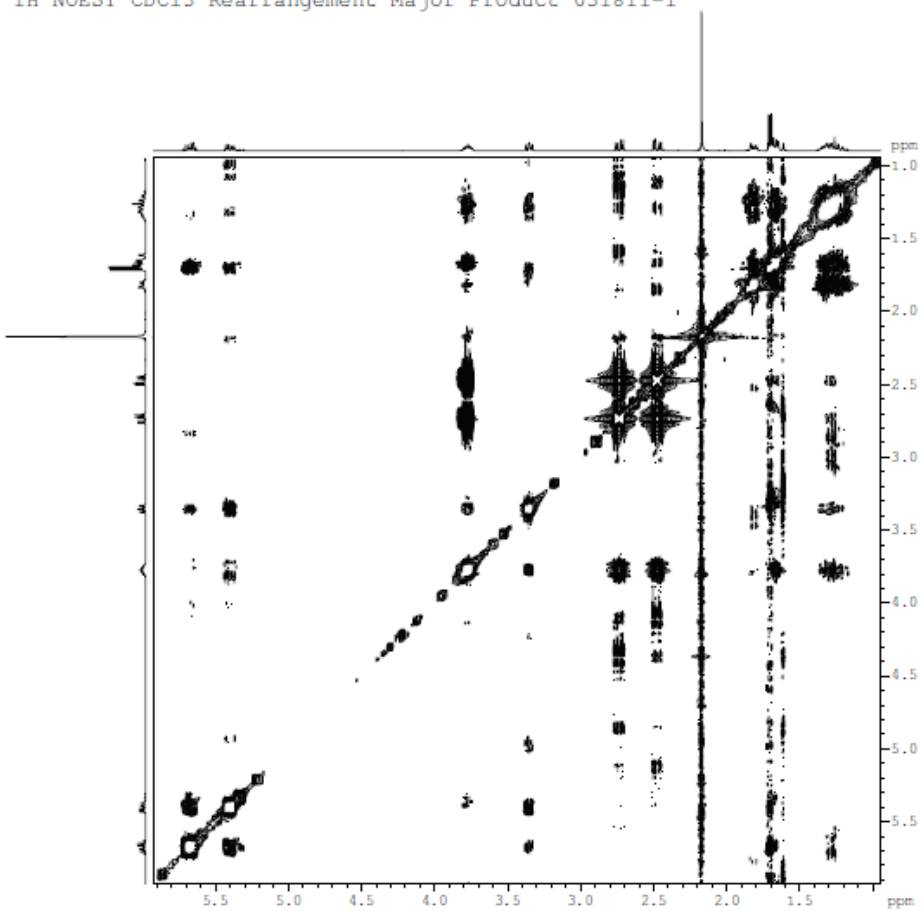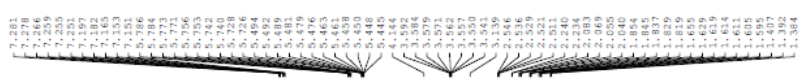

SW-F-104 500 MHz500 1H deprotection 113010

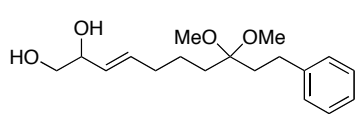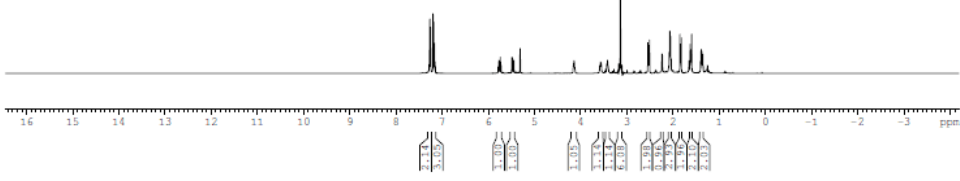

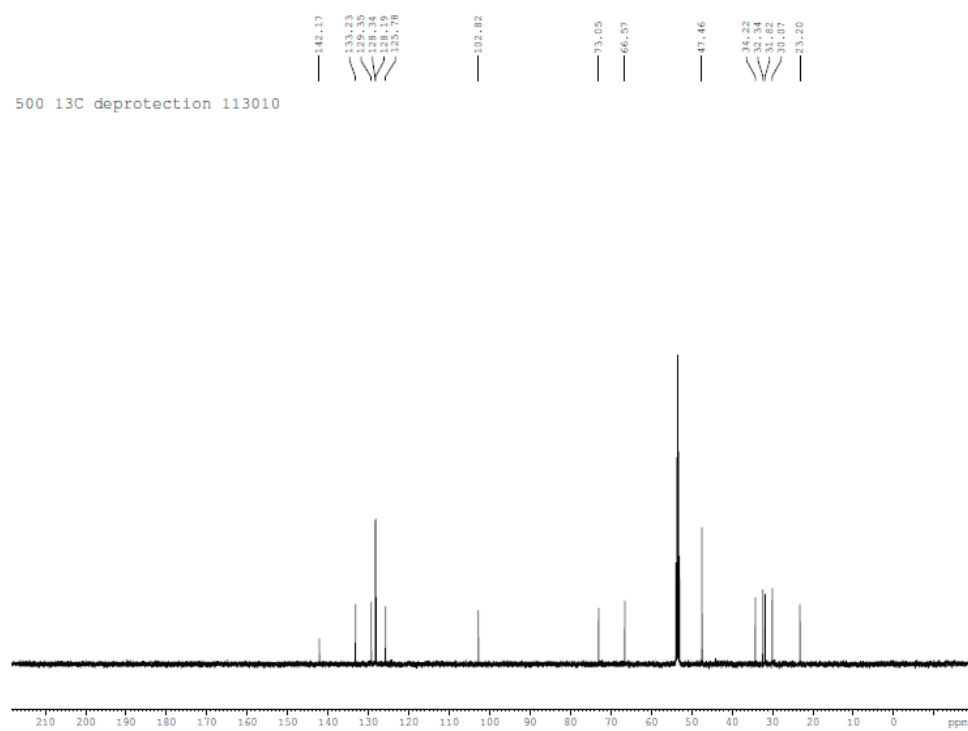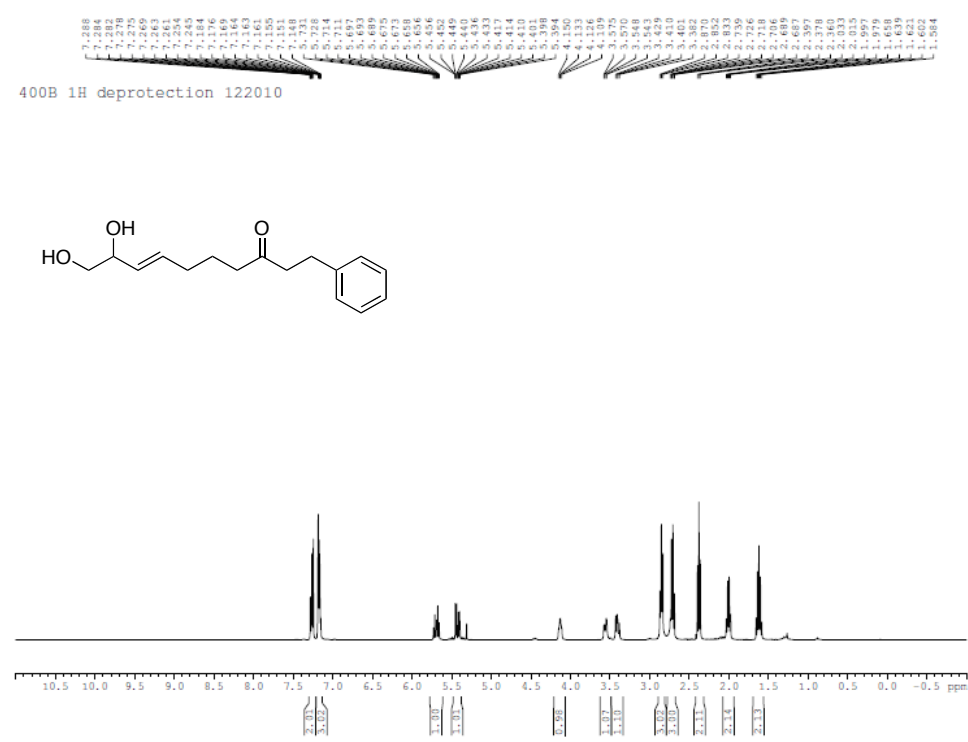



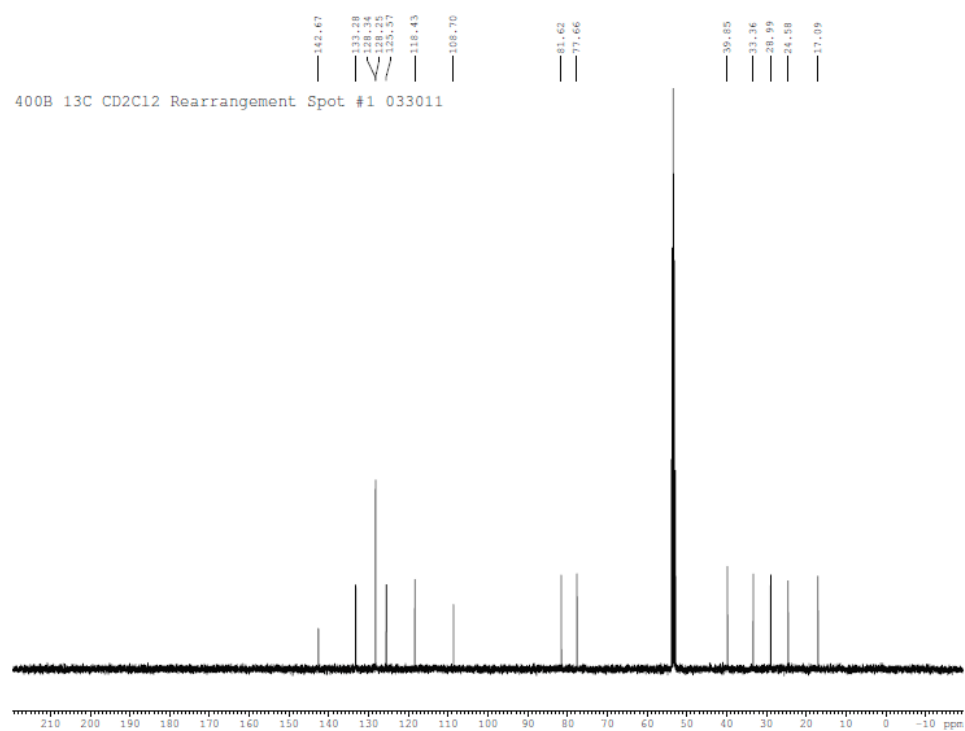

400B 1H COSY CD2Cl2 Rearrangement Spot #1 033011

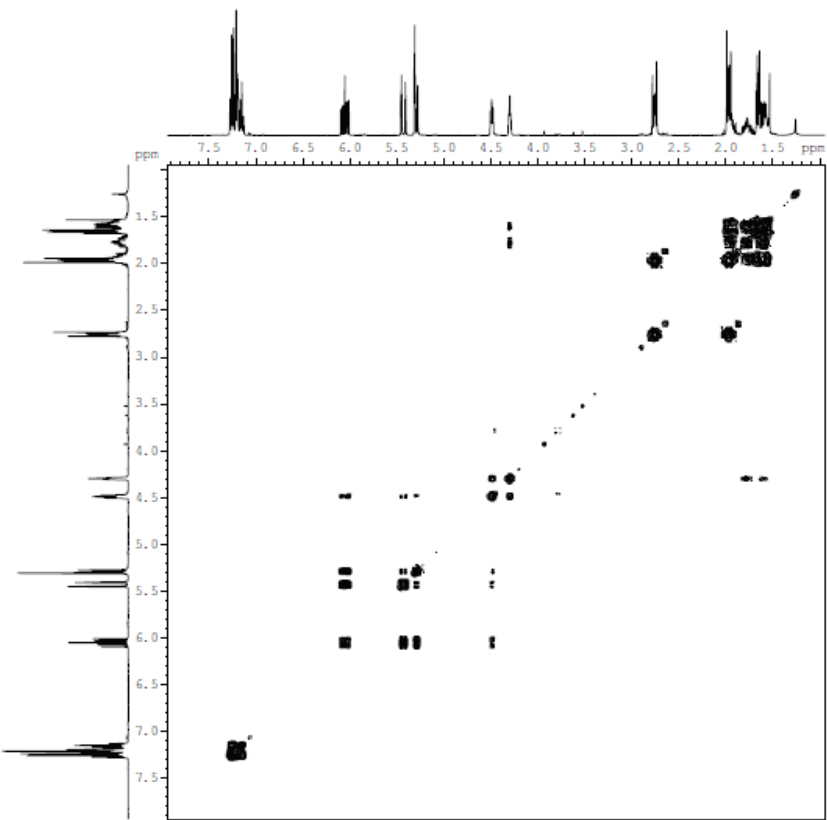

400B 1H NOESY CD2Cl2 Rearrangement Spot #1 033011

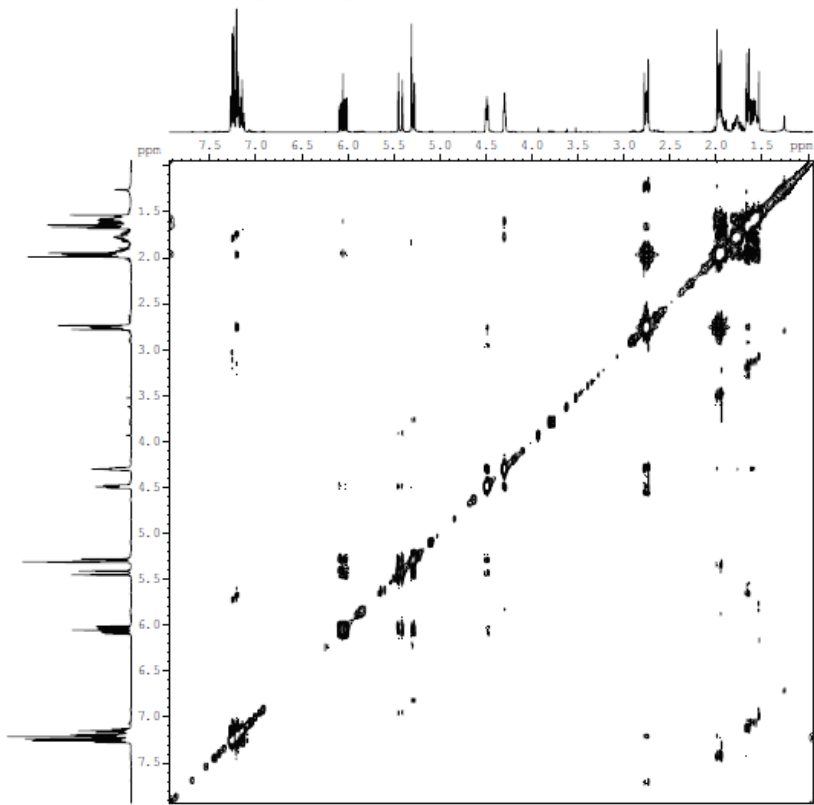



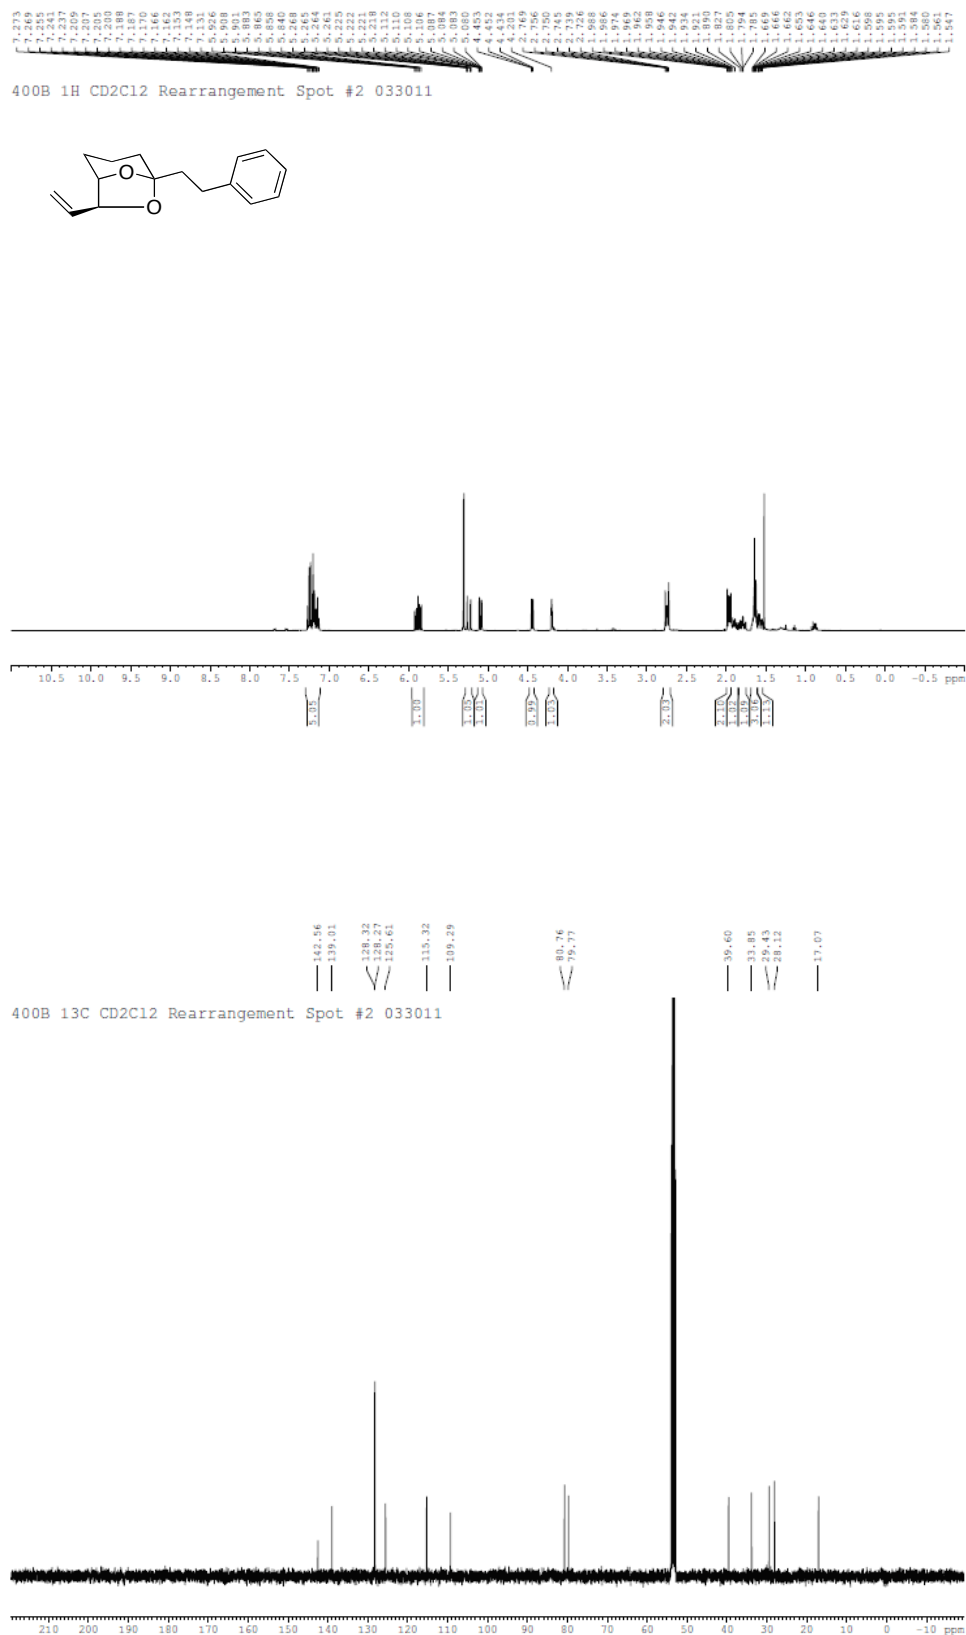

400B 1H COSY CD2Cl2 Rearrangement Spot #2 033011

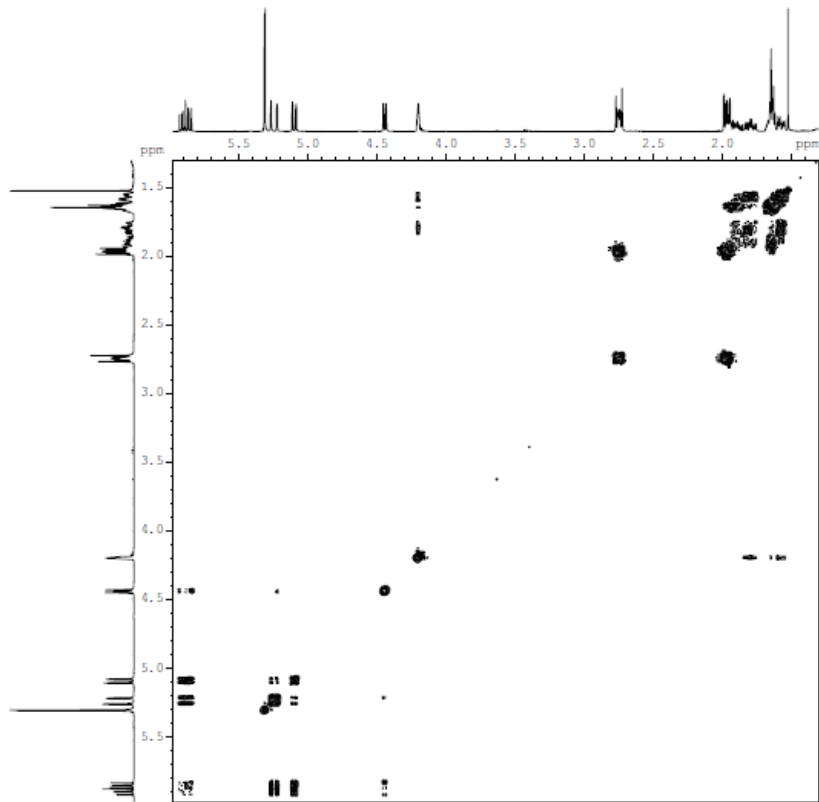

400B 1H CD2Cl2 NOESY Rearrangement Spot #2-2 033011

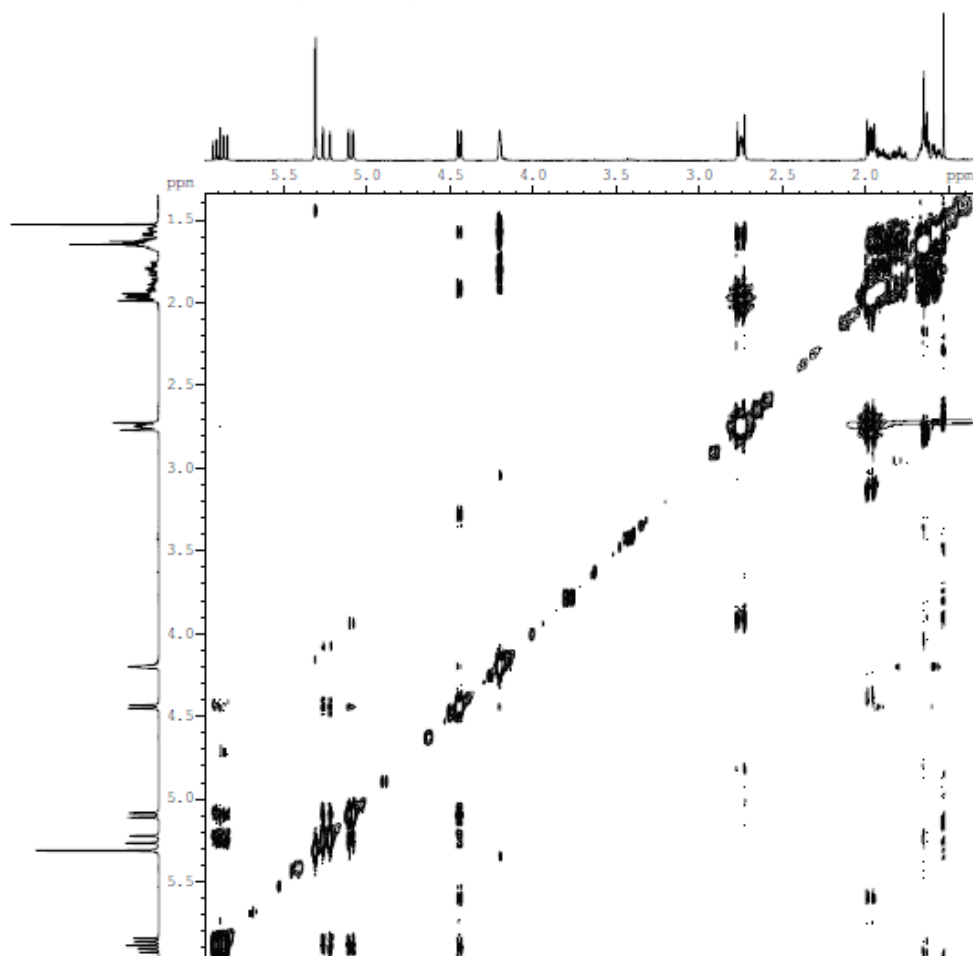



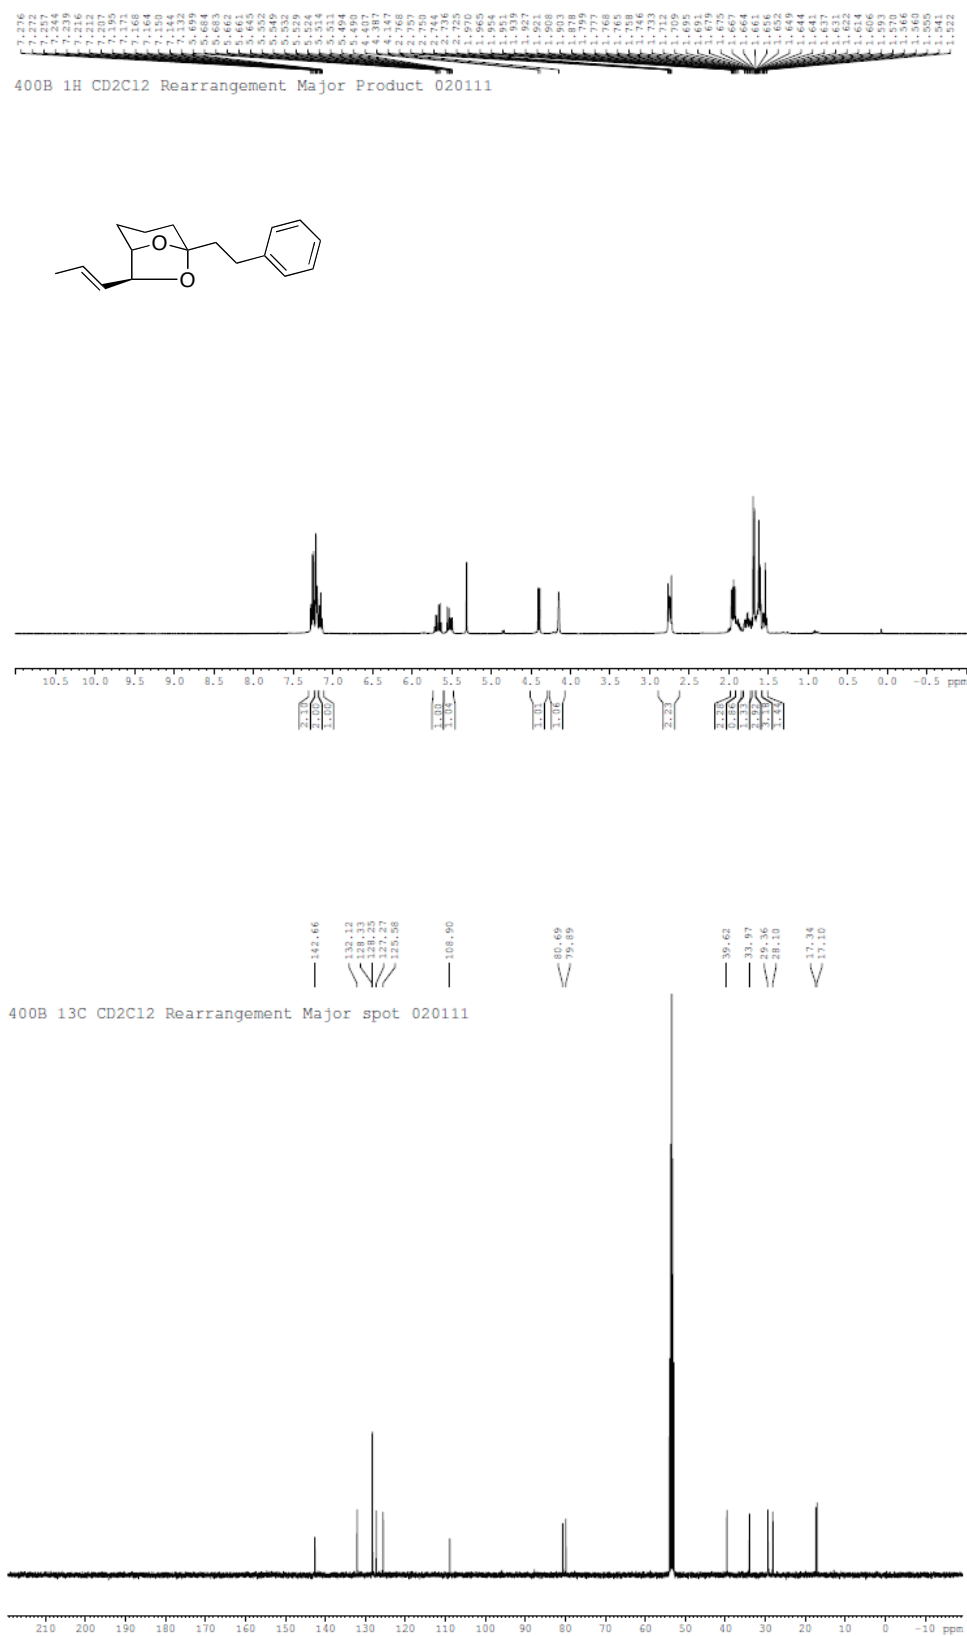

400B COSY CD2Cl2 Rearrangement Major Product 020111

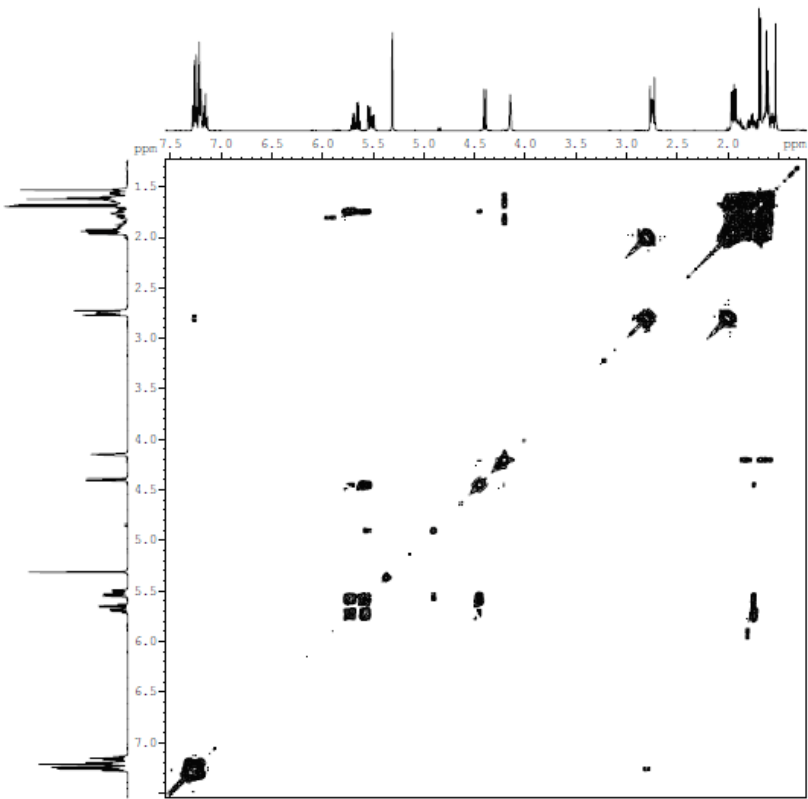

400B NOESY Rearrangement major product 020111

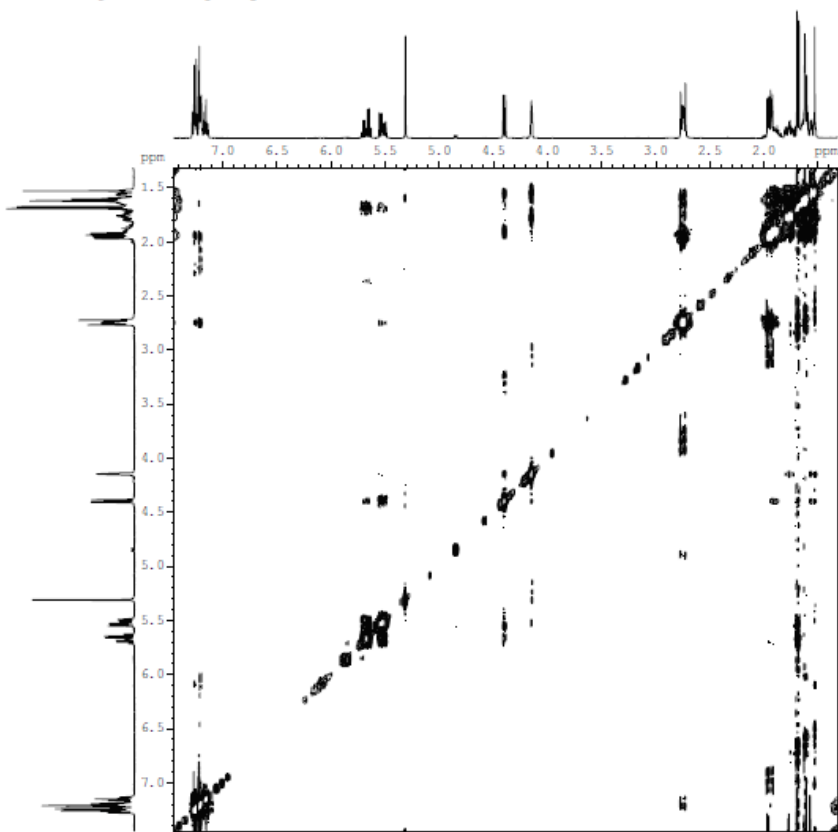

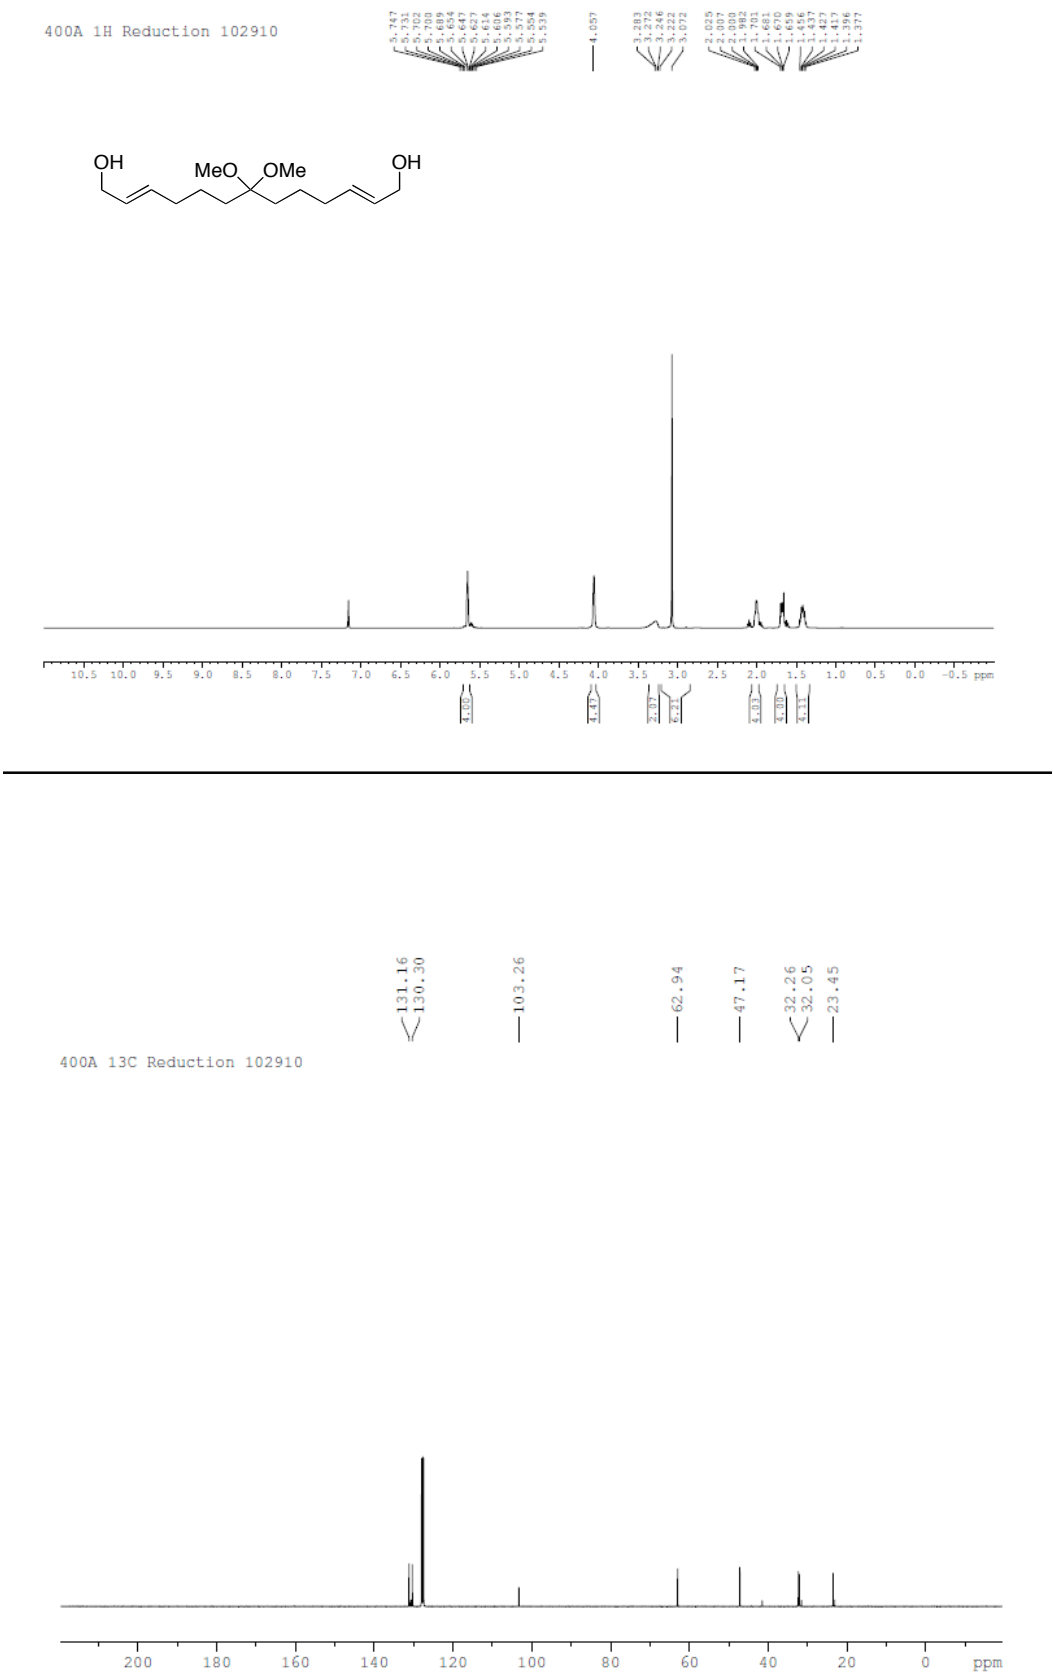



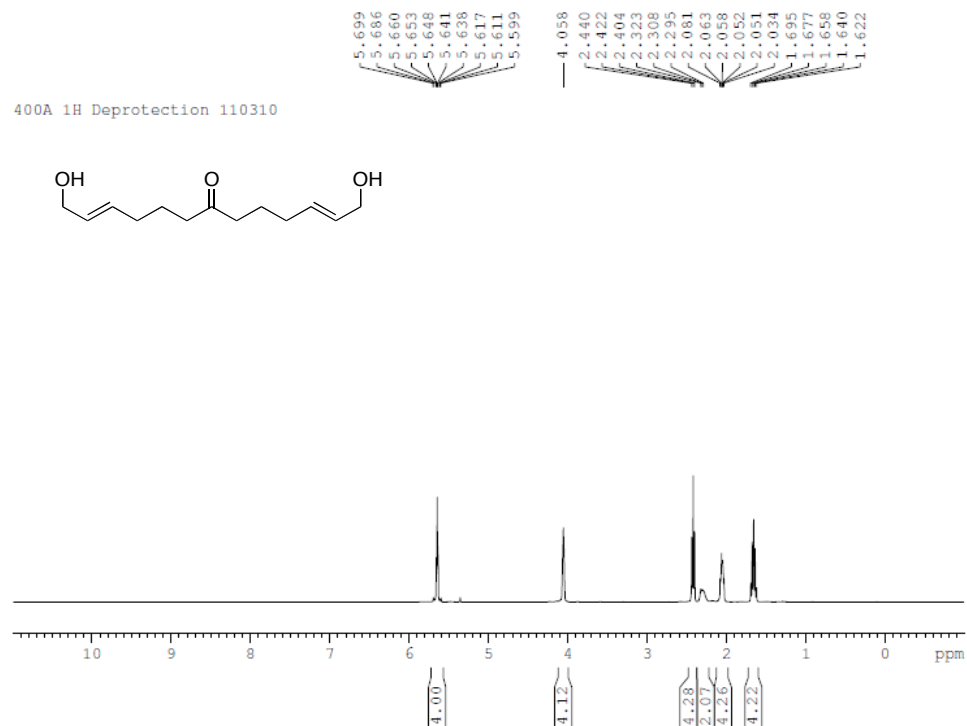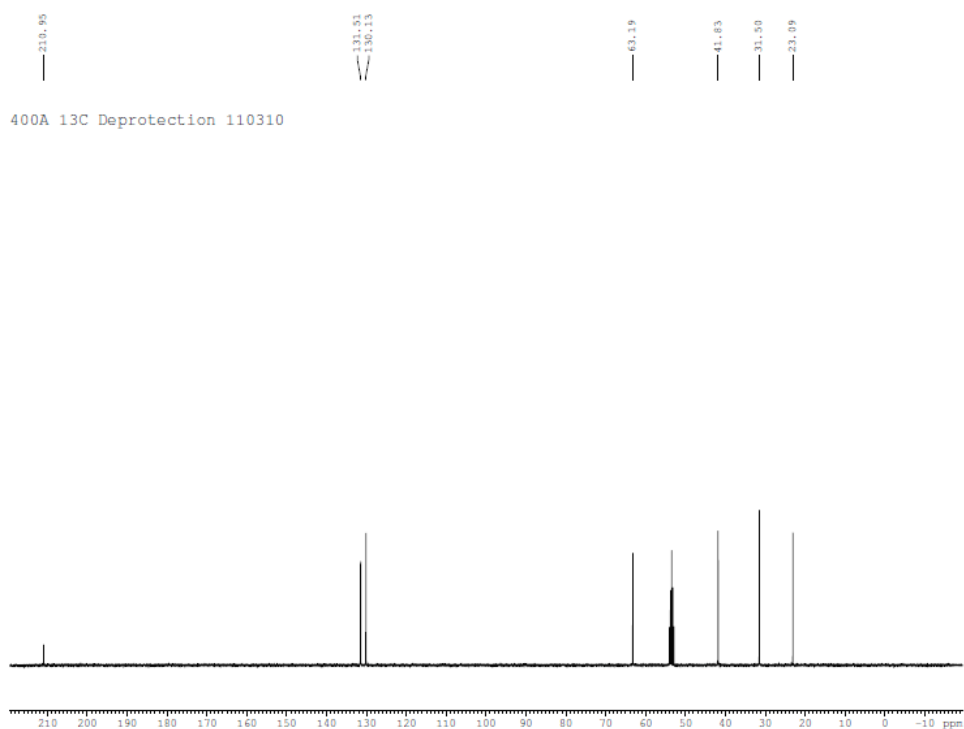

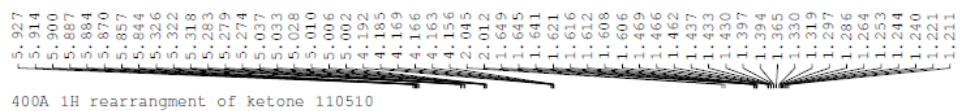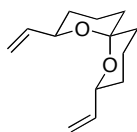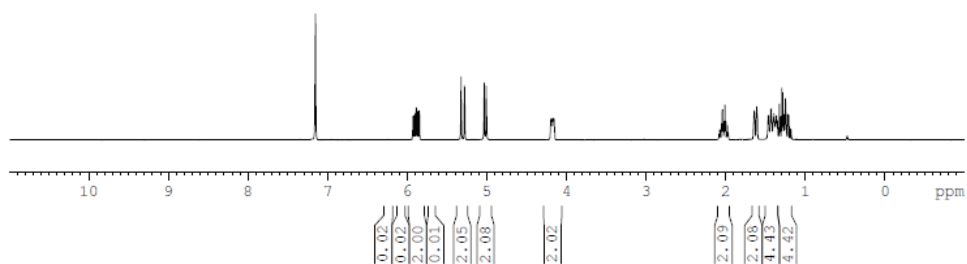

400A 13C rearrangment of ketone 110510

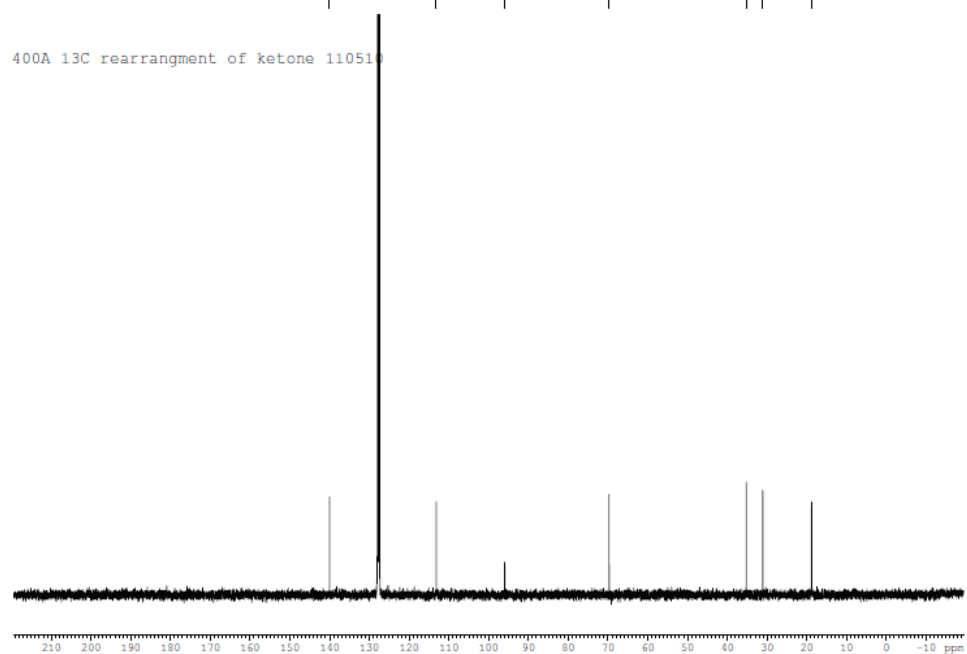



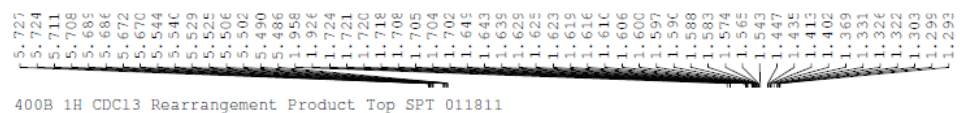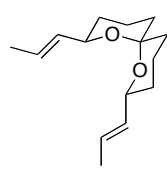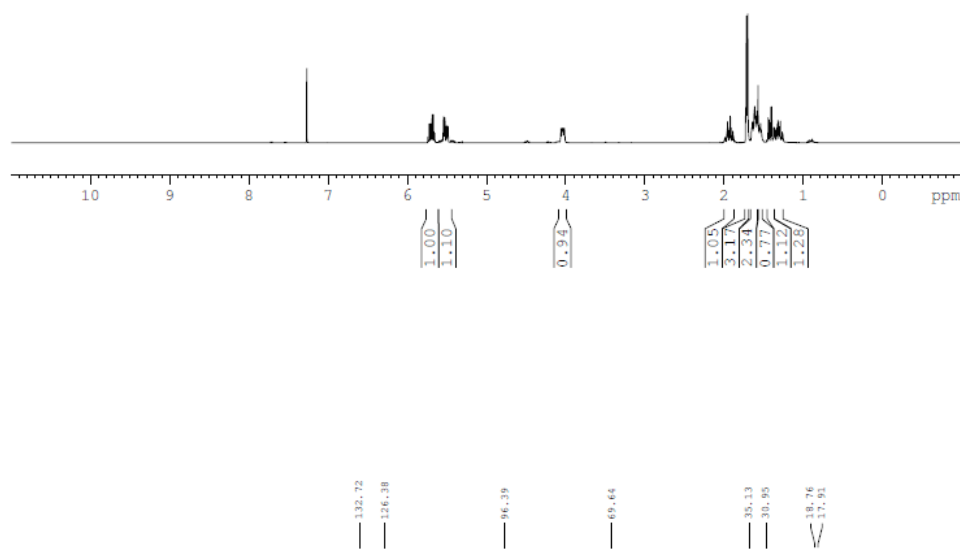





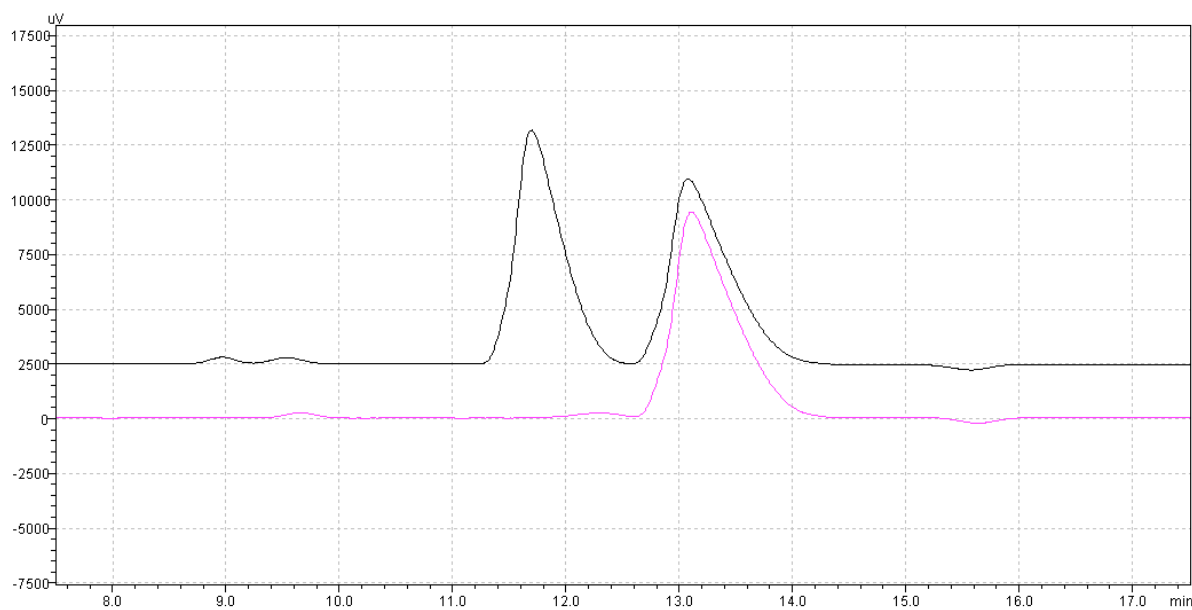

|                  | Ret. T | Area     | Area % | ee   |
|------------------|--------|----------|--------|------|
| Racemic ketal    | 11.695 | 308218.4 | 49.74  |      |
|                  | 13.075 | 311457.1 | 50.26  | 0.52 |
| Enantio-Enriched | 12.29  | 7190.9   | 2      |      |
|                  | 13.105 | 349449.5 | 98     | 96   |





400B 1H COSY CD2Cl2 Rearrangement Spot Bot #1

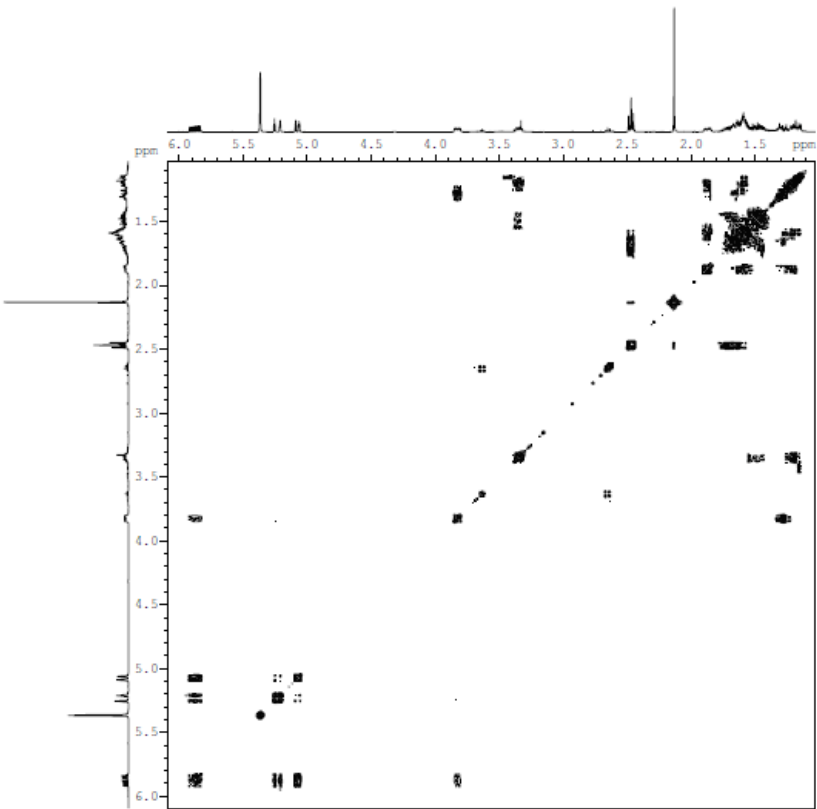

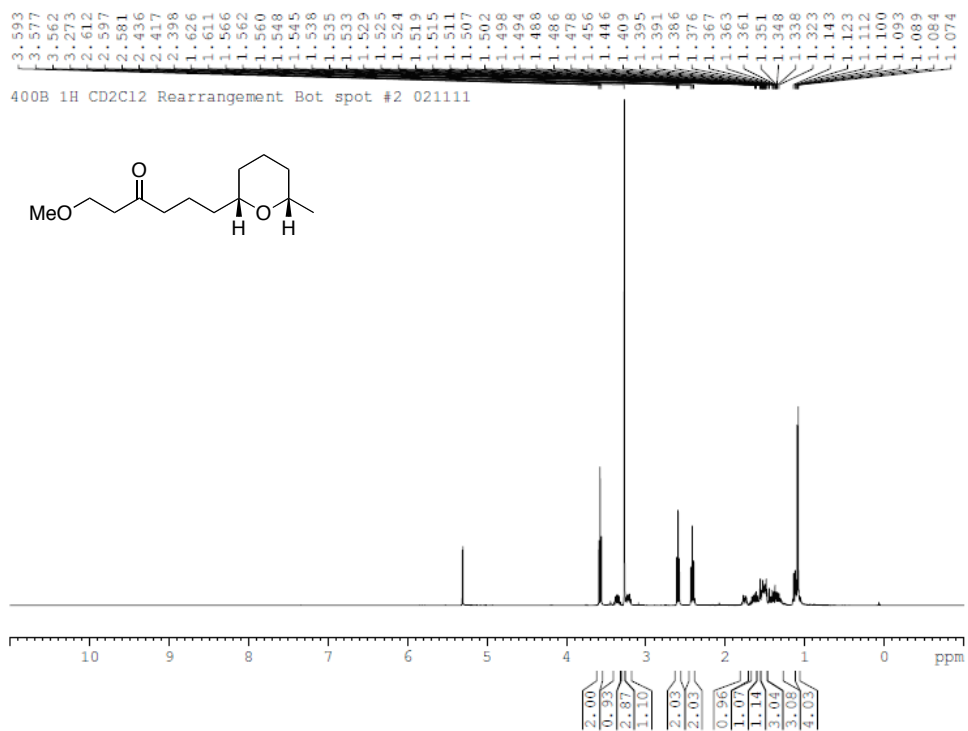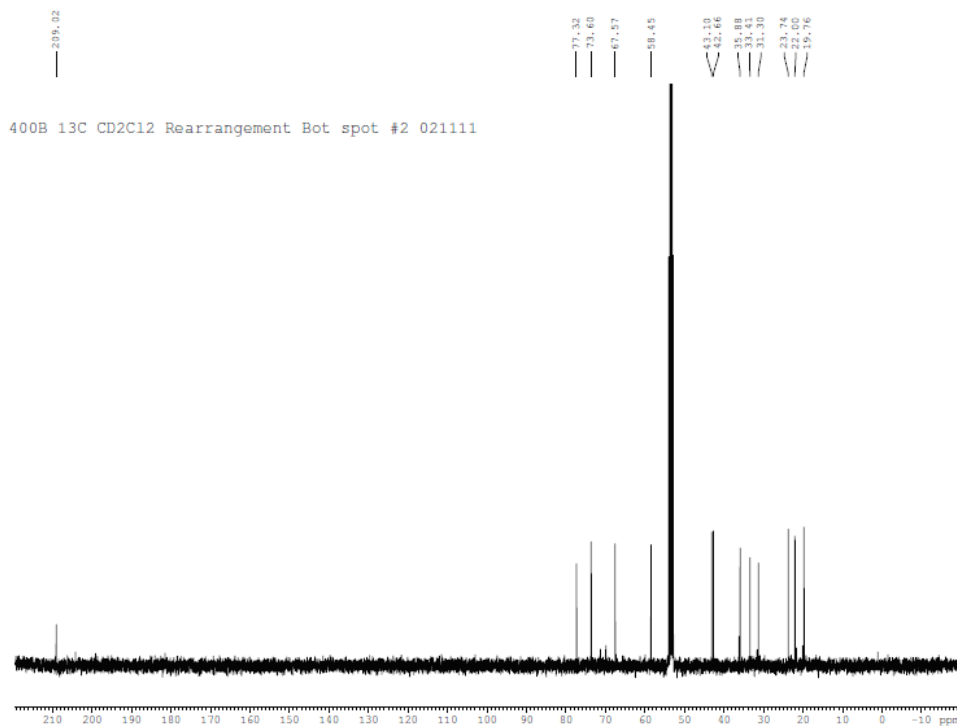

400B 1H COSY CD2Cl2 Rearrangement Bot spot #2 021111

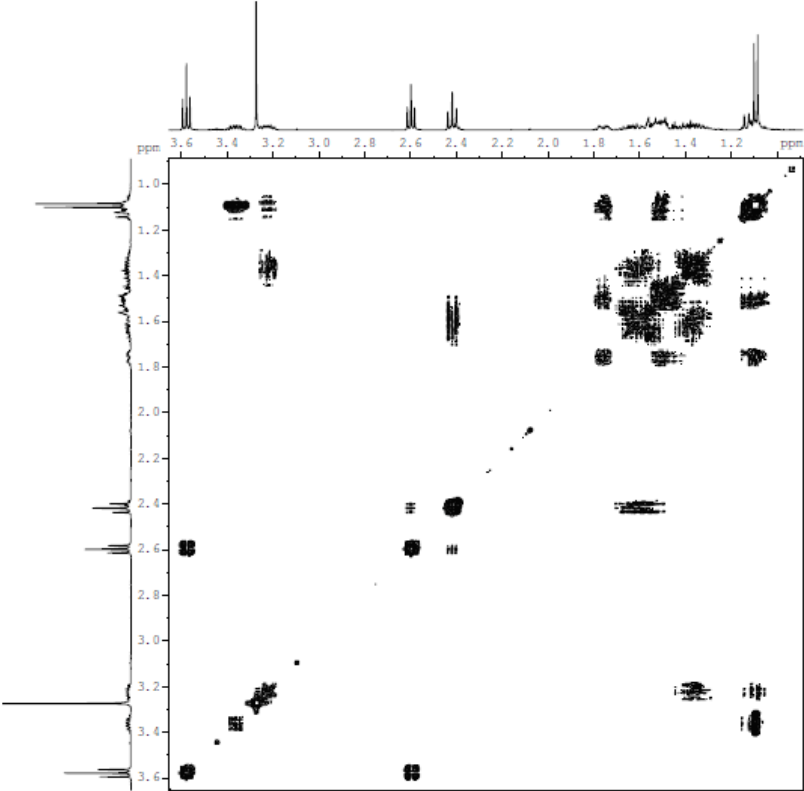





400B 1H COSY CDC13 Rearrangement Major 032811

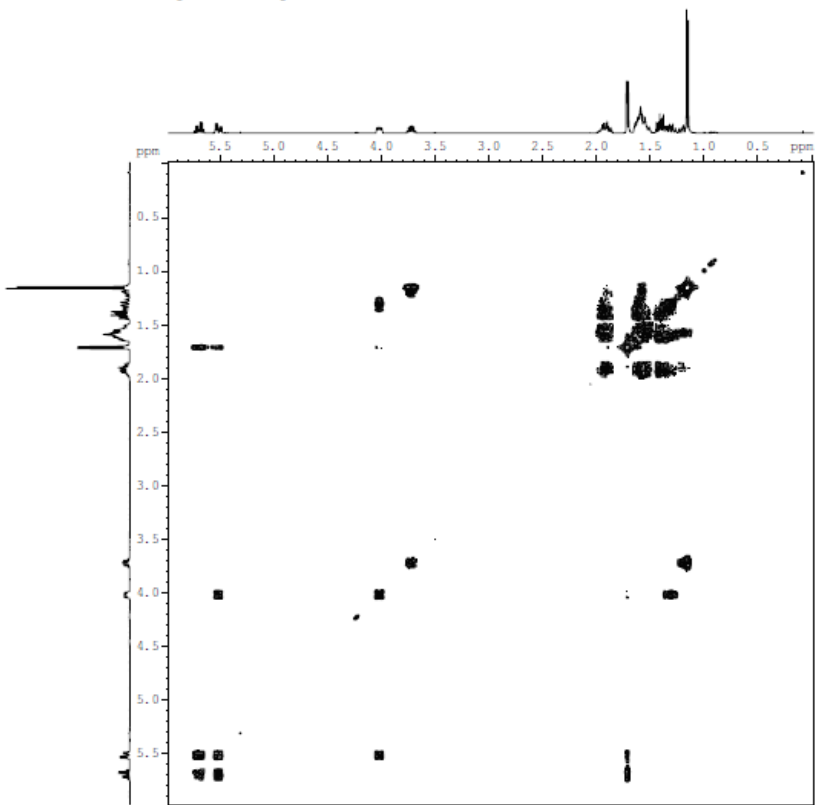

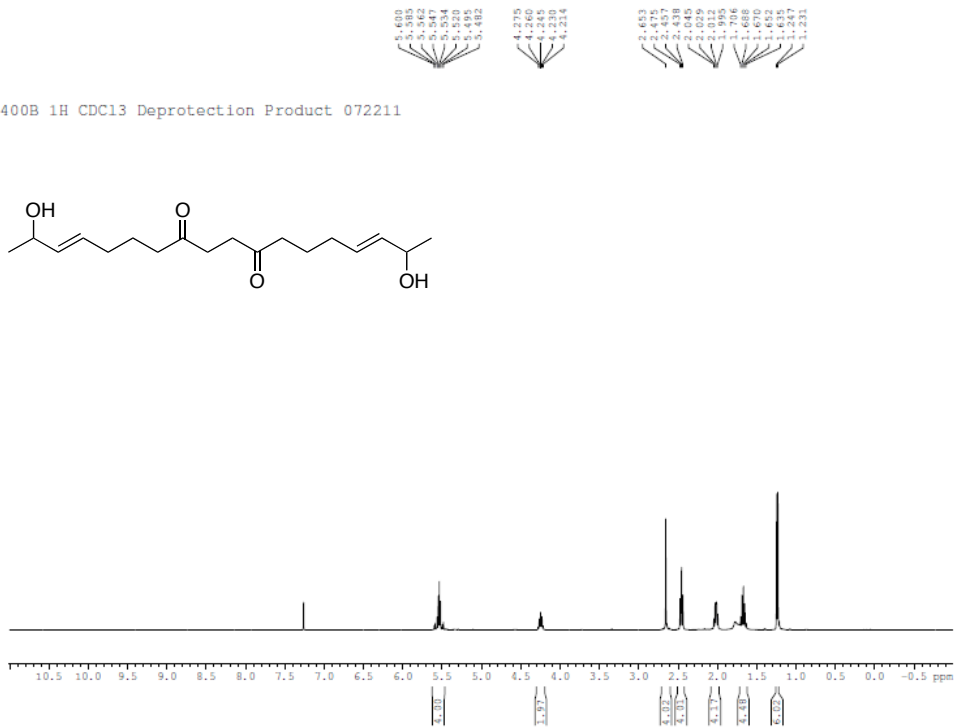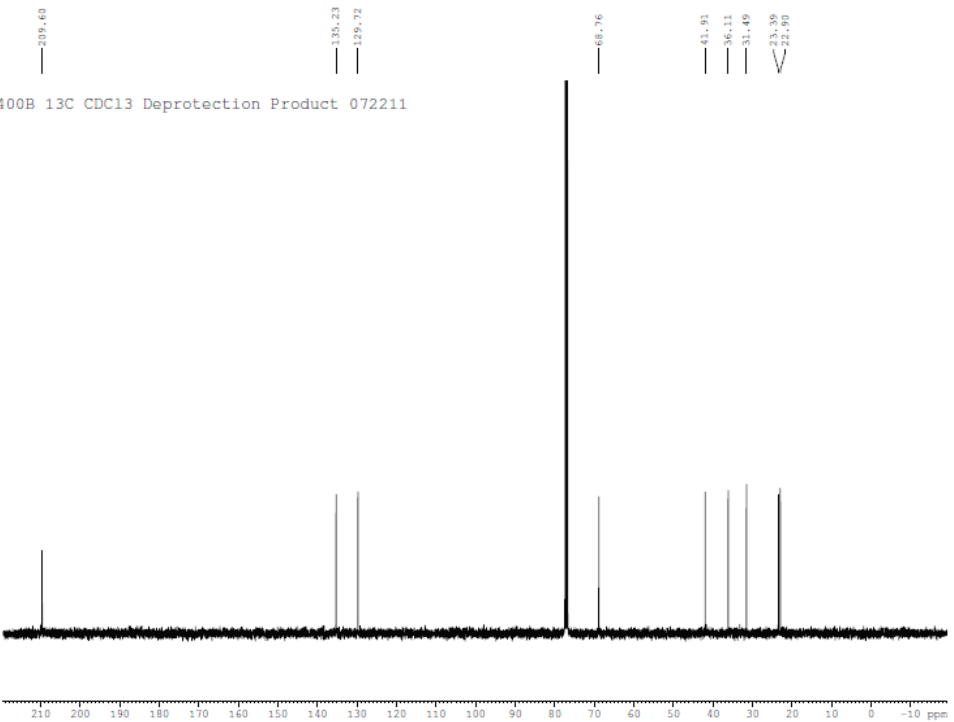

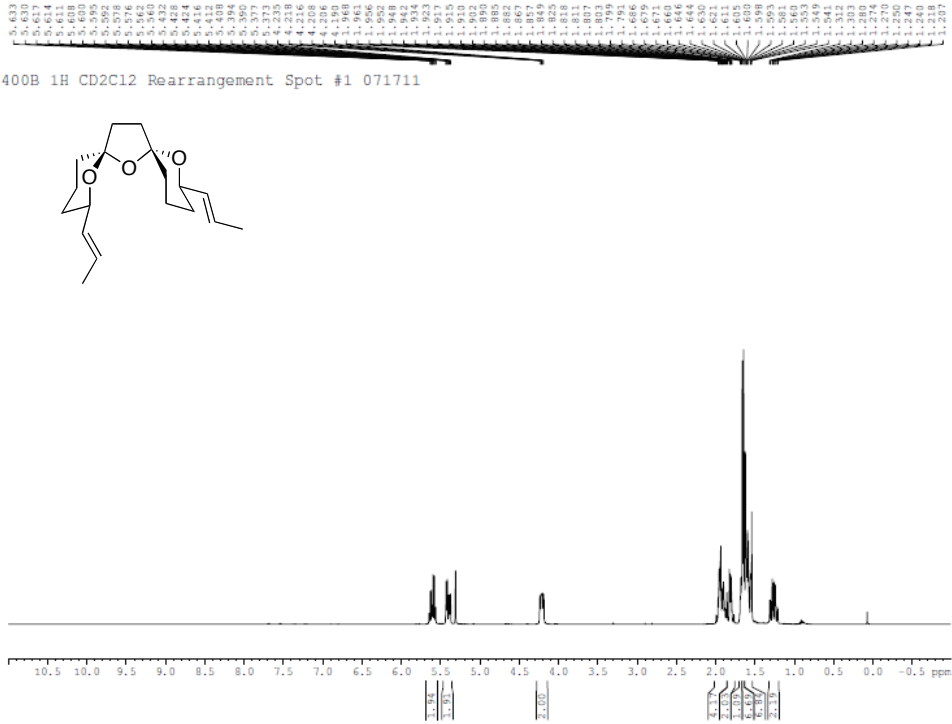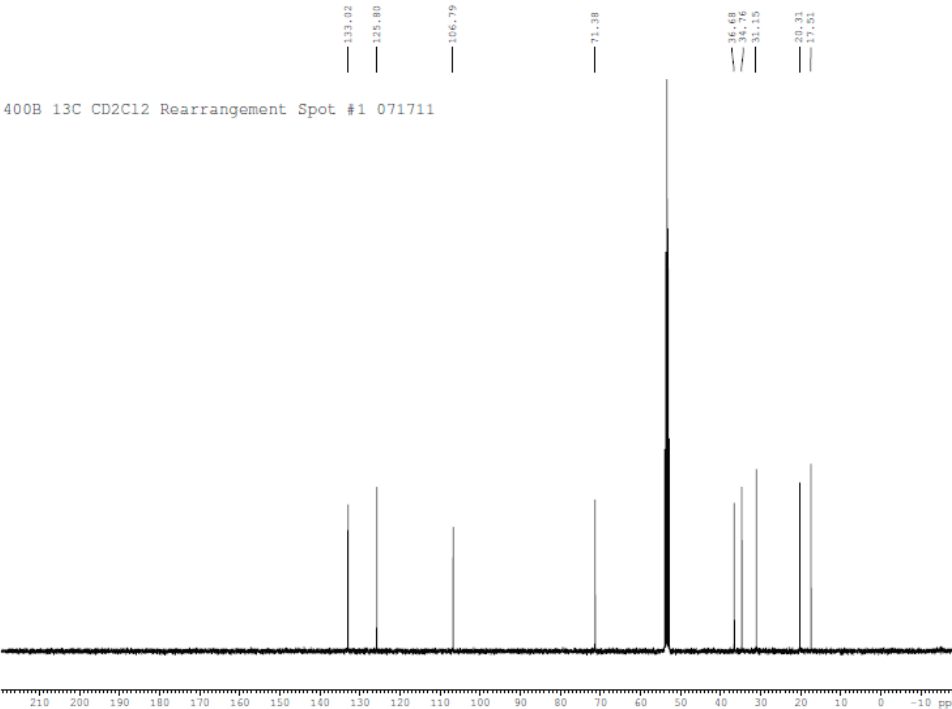



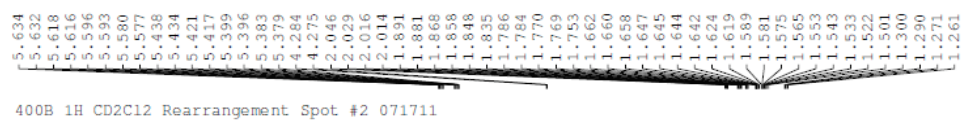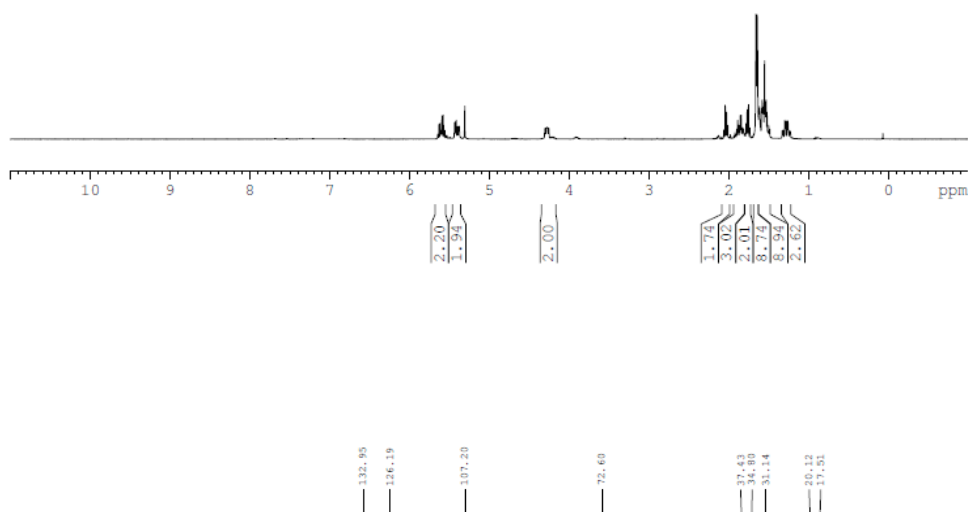

Supplement: c1sc00570g.pdf [file c1sc00570g.pdf]
